# Supplementary material for: A Co–Cu bimetallic magnetic nanocatalyst with synergistic and bifunctional performance for the base-free Suzuki, Sonogashira, and C–N cross-coupling reactions in water
Source: Royal Society of Chemistry journal article supplement (doi:10.1039/d0dt01846e), 2020-01-01
Supplement: d0dt01846e1.pdf [file d0dt01846e1.pdf]

## Support Information

### A Co-Cu bimetallic magnetic nanocatalyst with synergistic and bi-functional performance for the base-free Suzuki, Sonogashira, and C-N cross-coupling reactions in water

Mohammad Ali Nasseri,\* Zinat Rezazadeh, Milad Kazemnejadi, Ali Allahresani

*Department of Chemistry, Faculty of Sciences, University of Birjand, P. O. Box 97175-615, Birjand, Iran.*

\* Corresponding author: Email: [manaseri@birjand.ac.ir](mailto:manaseri@birjand.ac.ir)

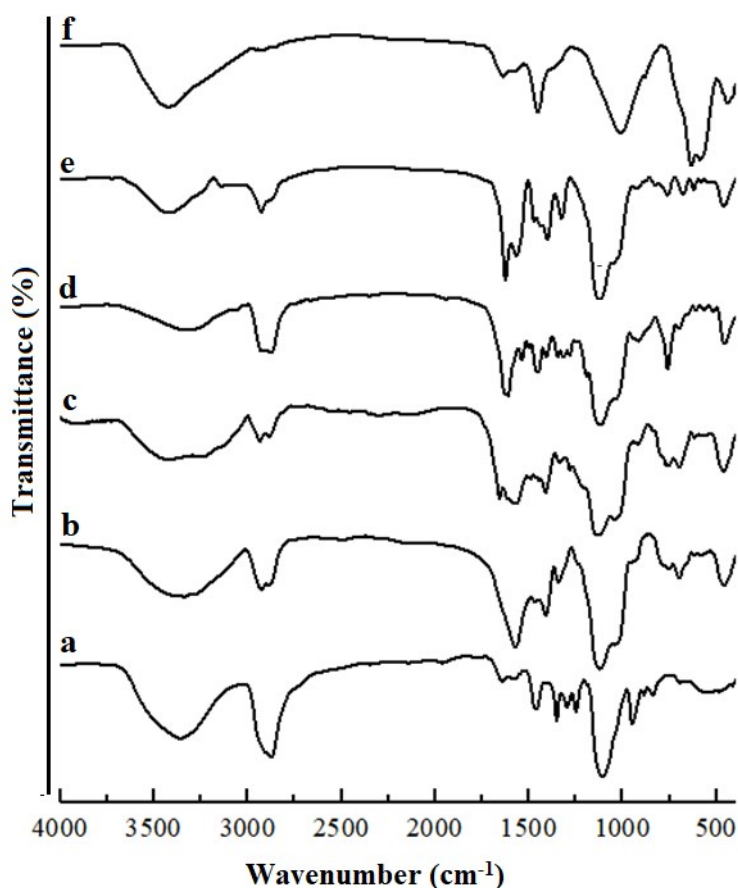

**Figure S1.** FT-IR spectra of (a) 1, (b) 2, (c) 3, (d) 4, (e) 5, (f) 6 compound

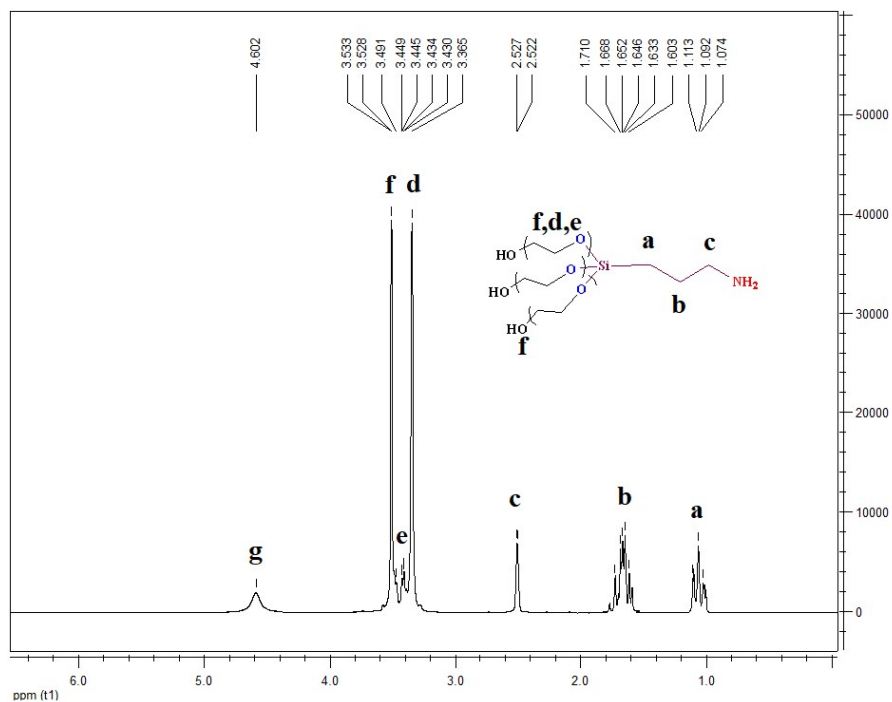

**Figure S2.** <sup>1</sup>H NMR spectrum of **1** (DMSO-*d*<sub>6</sub>, 300 MHz)

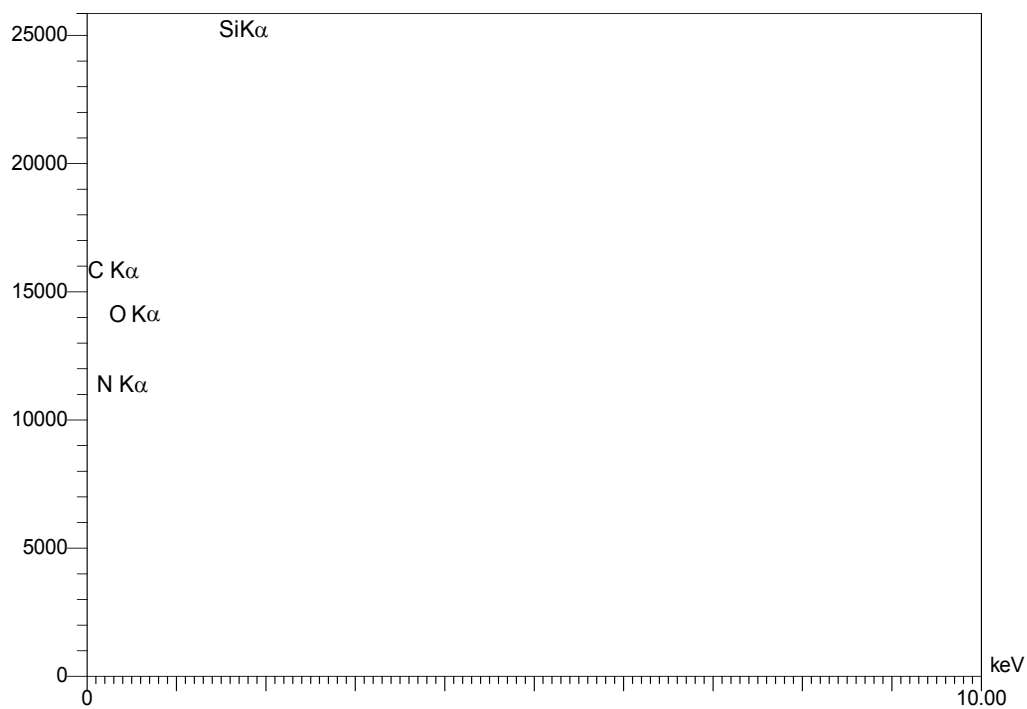

**Figure S3.** EDX analysis of PEG-APTES (**1**)

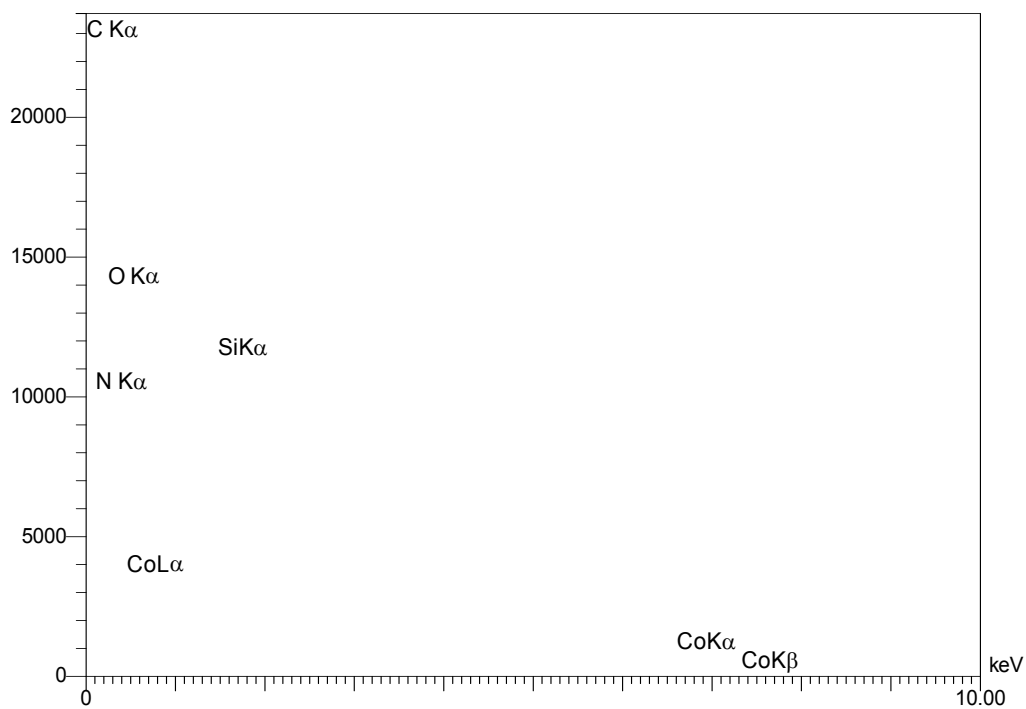

**Figure S4.** EDX analysis of PEG-APTES/Co (2)

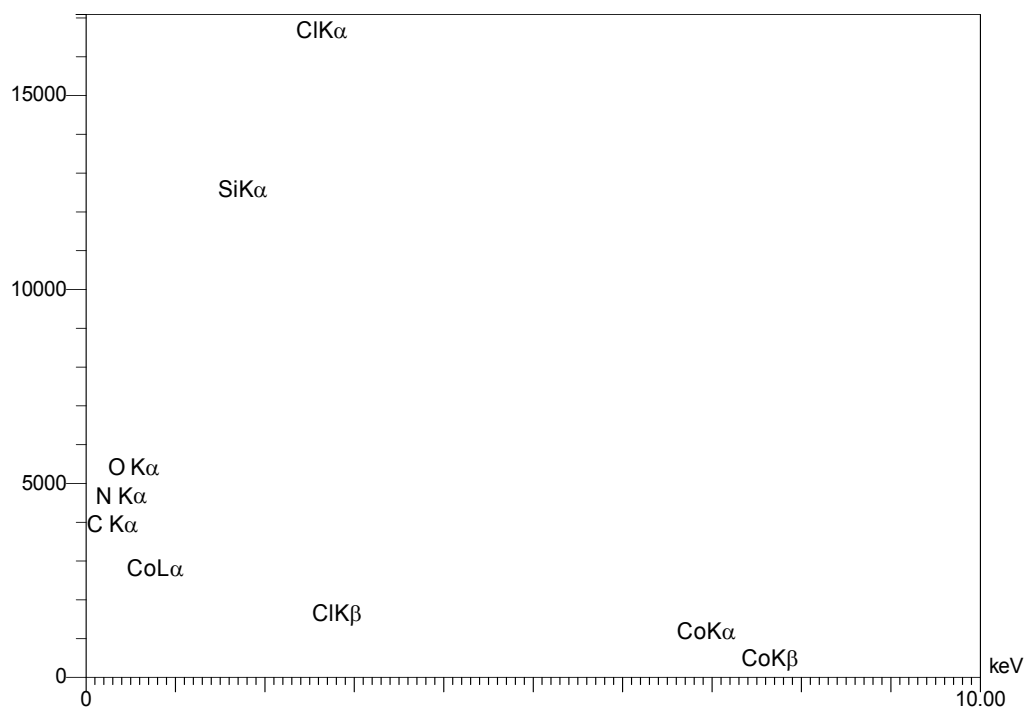

**Figure S5.** EDX analysis of PEG-APTES-Schiff base/Co (3)

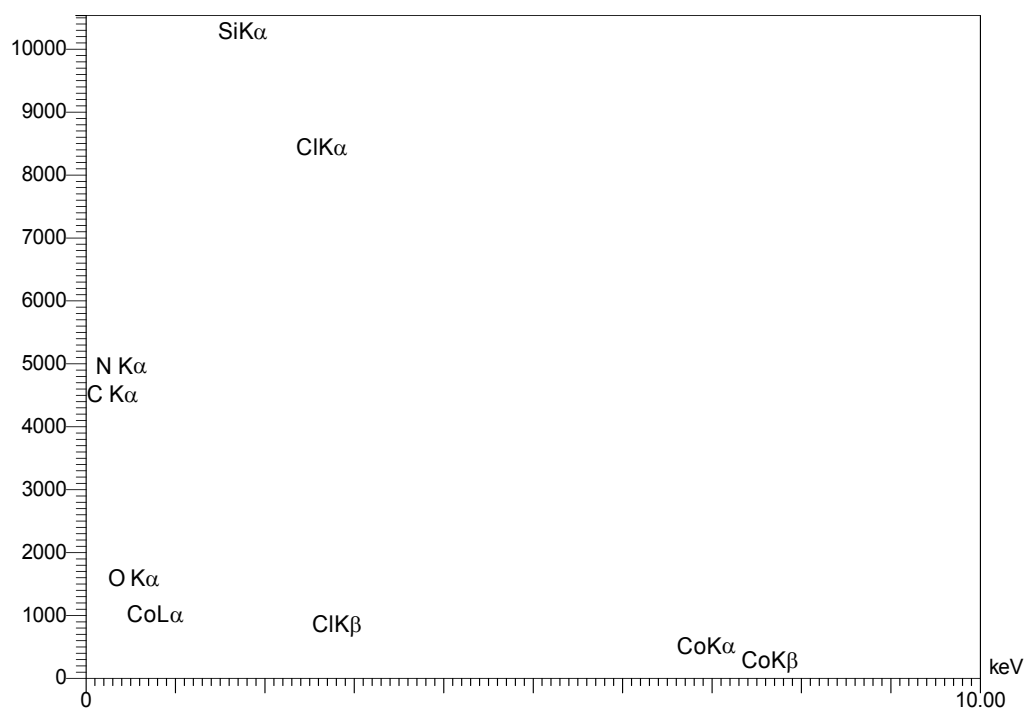

**Figure S6.** EDX analysis of Co complex-Schiff base-IL (4)

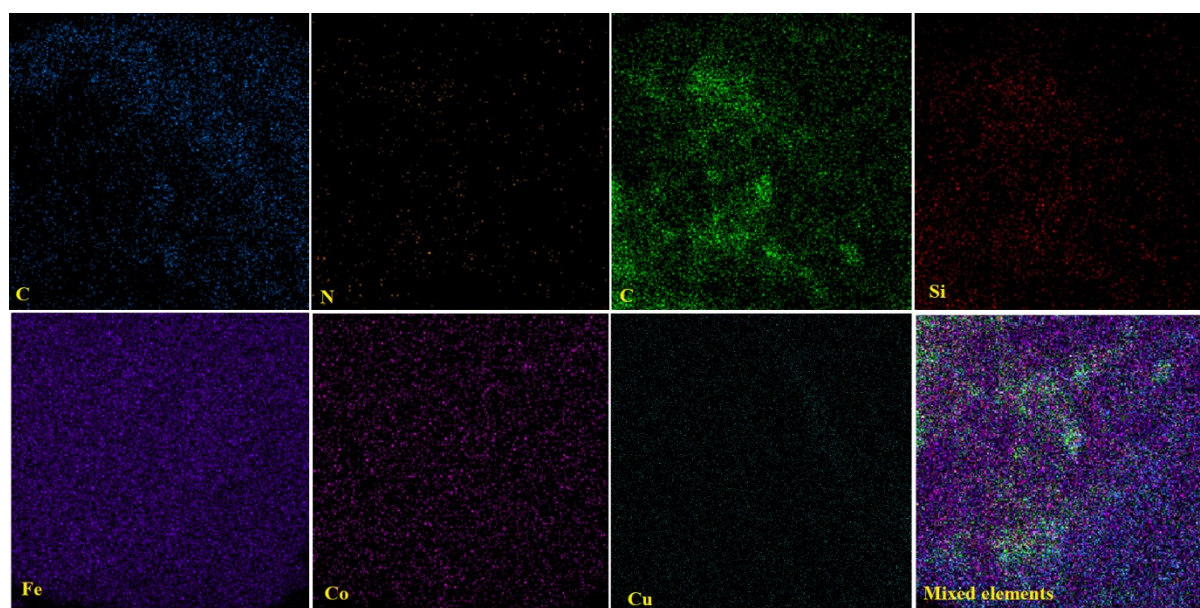

**Figure S7.** EDX mapping of  $\text{Fe}_3\text{O}_4@$ PEG/Cu-Co catalyst 6

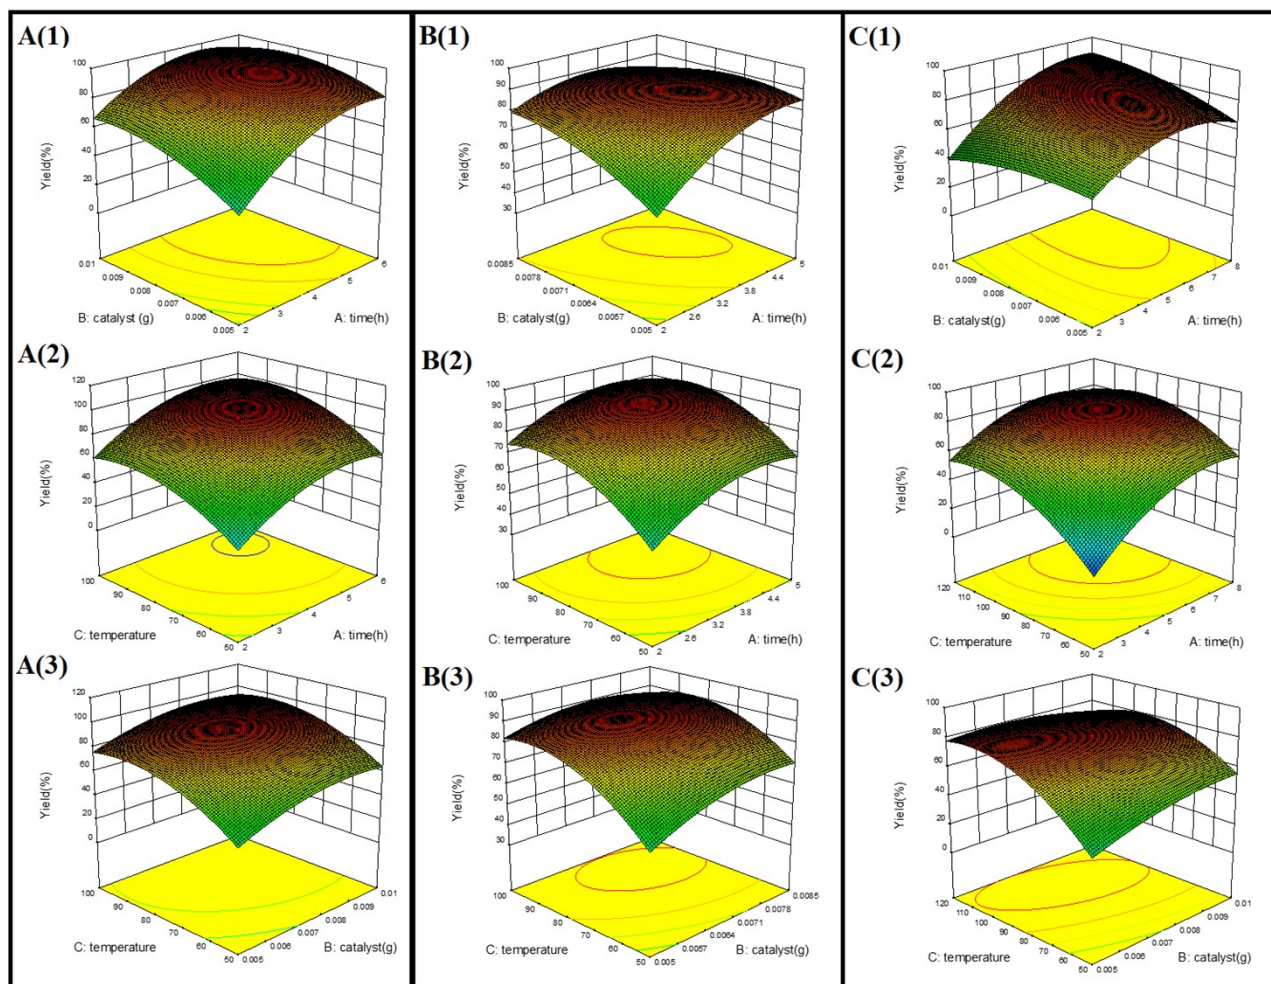

**Figure S8.** The 3D central design curves for foundation of optimization ranges for maximum response in (A) Sonogashira reaction model, (B) Suzuki reaction model, and (C) C-N cross coupling reaction model.

The model F-value of 535.95, 754.48, and 1465.52 for A, B, and C reactions, respectively indicate that the Quadratic model is significant. Values of "Prob>F" less than 0.0500 indicated that the model terms are significant. The "Lack of Fit F-value" of 2.59, 0.60, and 0.98 for A, B, and C reactions respectively, imply the Lack of Fit is not significant, which the Quadratic model to fit.

**Table S1.** ANOVA for Response Surface Quadratic Model in Sonogashira cross coupling [analysis of variance table]

| Source                       | Sum of Squares | df | Mean Squares | F-Value | p-value Prob > F | significance |
|------------------------------|----------------|----|--------------|---------|------------------|--------------|
| Model                        | 14472.66       | 7  | 2067.52      | 535.95  | < 0.0001         | significant  |
| C.V. %= 1.96                 |                |    |              |         |                  |              |
| R <sup>2</sup> = 0.9968      |                |    |              |         |                  |              |
| Adj R <sup>2</sup> = 0.9950  |                |    |              |         |                  |              |
| Pred R <sup>2</sup> = 0.9888 |                |    |              |         |                  |              |
| Adeq Precisor= 67.673        |                |    |              |         |                  |              |
| A-time                       | 3870.40        | 1  | 3870.40      | 1003.30 | < 0.0001         |              |
| B-amount of catalyst         | 1247.00        | 1  | 1247.00      | 323.25  | < 0.0001         |              |

|                |          |    |         |        |          |                 |
|----------------|----------|----|---------|--------|----------|-----------------|
| C-temperature  | 3275.40  | 1  | 3275.40 | 849.07 | < 0.0001 |                 |
| AB             | 190.12   | 1  | 190.12  | 49.29  | < 0.0001 |                 |
| AC             | 3.13     | 1  | 3.13    | 0.95   | 0.3537   |                 |
| BC             | 10.13    | 1  | 10.13   | 3.06   | 0.1106   |                 |
| A <sup>2</sup> | 2956.31  | 1  | 2956.31 | 766.35 | < 0.0001 |                 |
| B <sup>2</sup> | 1126.84  | 1  | 1126.84 | 292.10 | < 0.0001 |                 |
| C <sup>2</sup> | 2883.78  | 1  | 2883.78 | 747.55 | < 0.0001 |                 |
| Residual       | 46.29    | 12 | 3.86    |        |          |                 |
| Lack of Fit    | 36.29    | 7  | 5.18    | 2.59   | 0.1559   | not significant |
| Pure Error     | 10.00    | 5  | 2.00    |        |          |                 |
| Cor Total      | 14518.95 | 19 |         |        |          |                 |

**Table S2.** ANOVA for Response Surface Quadratic Model in Suzuki cross coupling [analysis of variance table]

| Source                       | Sum of Squares | df | Mean Squares | F-Value | p-value Prob > F | significance    |
|------------------------------|----------------|----|--------------|---------|------------------|-----------------|
| Model                        | 5989.98        | 9  | 665.55       | 754.48  | < 0.0001         | significant     |
| C.V. %= 1.29                 |                |    |              |         |                  |                 |
| R <sup>2</sup> = 0.9985      |                |    |              |         |                  |                 |
| Adj R <sup>2</sup> = 0.9972  |                |    |              |         |                  |                 |
| Pred R <sup>2</sup> = 0.9945 |                |    |              |         |                  |                 |
| Adeq Precisor= 90.066        |                |    |              |         |                  |                 |
| A-time                       | 865.61         | 1  | 865.61       | 981.27  | < 0.0001         |                 |
| B-amount of catalyst         | 354.61         | 1  | 354.61       | 401.99  | < 0.0001         |                 |
| C-temperature                | 1630.57        | 1  | 1630.57      | 1848.44 | < 0.0001         |                 |
| AB                           | 378.12         | 1  | 378.12       | 428.65  | < 0.0001         |                 |
| AC                           | 10.12          | 1  | 10.12        | 11.48   | 0.0069           |                 |
| BC                           | 78.12          | 1  | 78.12        | 88.56   | < 0.0001         |                 |
| A <sup>2</sup>               | 1034.19        | 1  | 1034.19      | 1172.37 | < 0.0001         |                 |
| B <sup>2</sup>               | 430.58         | 1  | 430.58       | 488.11  | < 0.0001         |                 |
| C <sup>2</sup>               | 1671.41        | 1  | 1671.41      | 1894.74 | < 0.0001         |                 |
| Residual                     | 8.82           | 10 | 0.88         |         |                  |                 |
| Lack of Fit                  | 3.32           | 5  | 0.66         | 0.60    | 0.7033           | not significant |
| Pure Error                   | 5.50           | 5  | 1.10         |         |                  |                 |
| Cor Total                    | 5998.80        | 19 |              |         |                  |                 |

**Table S3.** ANOVA for Response Surface Quadratic Model in C-N cross coupling [analysis of variance table]

| Source                       | Sum of Squares | df | Mean Squares | F-Value | p-value Prob > F | significance |
|------------------------------|----------------|----|--------------|---------|------------------|--------------|
| Model                        | 14371.65       | 9  | 1596.85      | 1465.52 | < 0.0001         | significant  |
| C.V. %= 1.87                 |                |    |              |         |                  |              |
| R <sup>2</sup> = 0.9992      |                |    |              |         |                  |              |
| Adj R <sup>2</sup> = 0.9986  |                |    |              |         |                  |              |
| Pred R <sup>2</sup> = 0.9966 |                |    |              |         |                  |              |
| Adeq Precisor= 99.173        |                |    |              |         |                  |              |
| A-time                       | 3663.12        | 1  | 3663.12      | 3361.84 | < 0.0001         |              |
| B-amount of catalyst         | 170.00         | 1  | 170.00       | 156.01  | < 0.0001         |              |
| C-temperature                | 2974.51        | 1  | 2974.51      | 2729.87 | < 0.0001         |              |
| AB                           | 512.00         | 1  | 512.00       | 469.89  | < 0.0001         |              |
| AC                           | 220.50         | 1  | 220.50       | 202.36  | < 0.0001         |              |
| BC                           | 338.00         | 1  | 338.00       | 310.20  | < 0.0001         |              |
| A <sup>2</sup>               | 3472.86        | 1  | 3472.86      | 3187.23 | < 0.0001         |              |
| B <sup>2</sup>               | 370.36         | 1  | 370.36       | 339.90  | < 0.0001         |              |
| C <sup>2</sup>               | 3791.69        | 1  | 3791.69      | 3479.84 | < 0.0001         |              |
| Residual                     | 10.90          | 10 | 1.09         |         |                  |              |

|             |          |    |      |      |        |                 |
|-------------|----------|----|------|------|--------|-----------------|
| Lack of Fit | 5.40     | 5  | 1.08 | 0.98 | 0.5081 | not significant |
| Pure Error  | 5.50     | 5  | 1.10 |      |        |                 |
| Cor Total   | 14382.55 | 19 |      |      |        |                 |

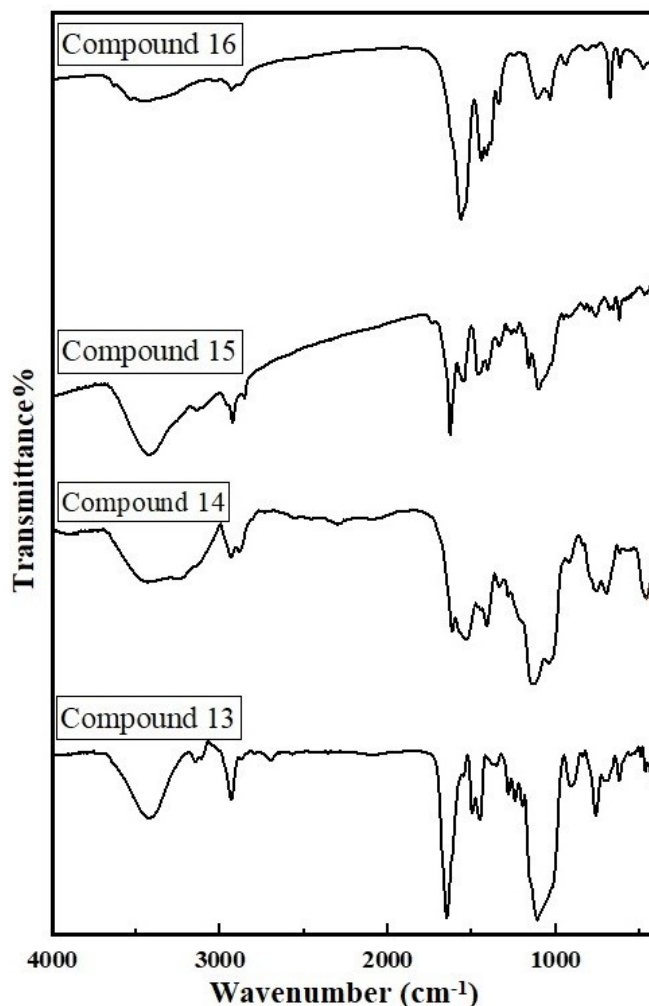

Fig. S9 FTIR spectra of compounds 13, 14, 15, and 16

#### Characterization data for compound 13

FTIR analysis  $\nu$  ( $\text{cm}^{-1}$ ): 1103 (Si-O-Si), 1485 (C=C), 1555 (C=C), 1683 (C=N), 3403 (O-H). EXD analysis (mean average of 5 point): wt% = C 56.76, Cl 1.39, N 1.96, O 37.58, Si 2.31.

#### Characterization data for compound 14

FTIR analysis  $\nu$  ( $\text{cm}^{-1}$ ): 1111 (Si-O-Si), 1410 (C=C), 1570 (C=C), 1668 (C=N), 3423 (O-H), 486 (Co-O). EXD analysis (mean average of 5 point): wt% = C 55.63, Cl 1.34, N 1.94, O 37.53, Si 2.26, Co 1.30. ICP analysis: Co wt% 1.37.

#### Characterization data for compound 15

FTIR analysis  $\nu$  ( $\text{cm}^{-1}$ ): 1100 (Si-O-Si), 1410 (C=C), 1493 (C=C), 1670 (C=N), 3406 (O-H), 484 (Cu-O), 622 (Cu-N). EXD analysis (mean average of 5 point): wt% = C 55.13, Cl 1.22, N 1.94, O 37.53, Si 2.26, Cu 1.92. ICP analysis: Cu wt% 1.95.

#### **Characterization data for compound 16**

FTIR analysis  $\nu$  ( $\text{cm}^{-1}$ ): 1114 (Si-O-Si), 1408 (C=C), 1484 (C=C), 1610 (C=N), 34019 (O-H), 490 (Co-O), 622 (Co-N), 460 (Cu-O). EXD analysis (mean average of 5 point): wt% = C 56.09, Cl 1.34, N 1.44, O 36.53, Si 2.24, Cu 1.19, Co 2.07. ICP analysis: Cu wt% 1.23, Co 2.00 wt% .



### 1-phenyl-1H-imidazole (Table 1, 9a)

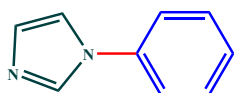

Prepared according to the general C-N coupling procedure on 1mmol scale and obtained an isolated yield of 80% (115.33 mg) as a pale yellow oil.  $^1\text{H}$  NMR (250 MHz,  $\text{CDCl}_3$ ):  $\delta$  (ppm)= 7.15-7.45 (m, 6H), 7.80 (s, 1H);  $^{13}\text{C}$  NMR (62.5 MHz,  $\text{CDCl}_3$ ):  $\delta$  (ppm)= 118.2, 121.5, 127.5, 130.0, 130.3, 135.5, 137.4.

### 1-phenylpiperidine (Table 1, 9b)

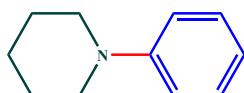

Prepared according to the general C-N coupling procedure on 1mmol scale and obtained an isolated yield of 75% (120.93 mg) as a pale yellow oil.  $^1\text{H}$  NMR (250 MHz,  $\text{CDCl}_3$ ):  $\delta$  (ppm)= 1.62 (m, 6H), 3.73 (d,  $J=5.0$  Hz, 4H), 6.73-6.80 (m, 3H), 7.07-7.17 (m, 2H), 6.93 (m, 2H), 7.22-7.25 (m, 2H);  $^{13}\text{C}$  NMR (62.5 MHz,  $\text{CDCl}_3$ ):  $\delta$  (ppm)= 24.6, 25.6, 54.1, 114.4, 123.6, 129.1, 150.5.

### 1-phenyl-1H-indole (Table 1, 9c)

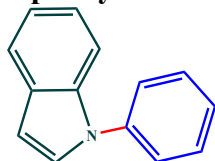

Prepared according to the general C-N coupling procedure on 1mmol scale and obtained an isolated yield of 68% (131.40 mg) as a colorless oil.  $^1\text{H}$  NMR (250 MHz,  $\text{CDCl}_3$ ):  $\delta$  (ppm)= 6.60 (m, 1H), 7.20 (m, 2H), 7.32 (m, 2H), 7.41-7.65 (m, 6H);  $^{13}\text{C}$  NMR (62.5 MHz,  $\text{CDCl}_3$ ):  $\delta$  (ppm)= 103.5, 110.6, 120.4, 121.1, 122.3, 124.3, 126.5, 128.0, 129.3, 129.6, 135.8, 139.8.

### 4-phenylmorpholine (Table 1, 9d)

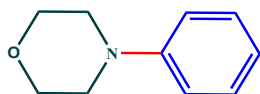

Prepared according to the general C-N coupling procedure on 1mmol scale and obtained an isolated yield of 73% (119.15 mg) as a pale yellow solid.  $^1\text{H}$  NMR (250 MHz,  $\text{CDCl}_3$ ):  $\delta$  (ppm)= 3.14 (t,  $J_1=4.0$  Hz,  $J_2=7.5$  Hz, 4H), 3.30 (t,  $J_1=4.0$  Hz,  $J_2=7.5$  Hz, 4H), 6.60 (m, 3H), 7.27 (m, 2H);  $^{13}\text{C}$  NMR (62.5 MHz,  $\text{CDCl}_3$ ):  $\delta$  (ppm)= 49.2, 66.8, 115.6, 119.9, 129.1, 151.2.

### Diphenylamine (Table 1, 9e)

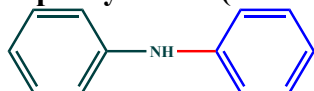

Prepared according to the general C-N coupling procedure on 1mmol scale and obtained an isolated yield of 65% (109.99 mg) as a yellow solid.  $^1\text{H}$  NMR (250 MHz,  $\text{CDCl}_3$ ):  $\delta$  (ppm)= 5.64 (s, br, 1H), 6.95 (m, 2H), 7.10 (m, 4H), 7.26 (m, 4H);  $^{13}\text{C}$  NMR (62.5 MHz,  $\text{CDCl}_3$ ):  $\delta$  (ppm)= 117.8, 121.0, 130.0, 145.9.

### 1-phenyl-1H-pyrrole (Table 1, 9f)

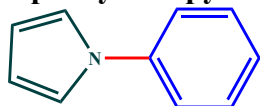

Prepared according to the general C-N coupling procedure on 1mmol scale and obtained an isolated yield of 80% (114.55 mg) as a white solid.  $^1\text{H}$  NMR (250 MHz,  $\text{CDCl}_3$ ):  $\delta$  (ppm)= 6.27 (t,  $J_1=2.25$  Hz,  $J_2=4.5$  Hz, 2H), 7.00 (m, 2H), 7.12-7.18 (m, 1H), 7.28-7.33 (m, 4H);  $^{13}\text{C}$  NMR (62.5 MHz,  $\text{CDCl}_3$ ):  $\delta$  (ppm)= 110.4, 120.5, 121.2, 126.9, 130.5, 140.7.

### 1-phenylpyrrolidine (Table 1, 9g)

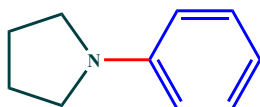

Prepared according to the general C-N coupling procedure on 1mmol scale and obtained an isolated yield of 78% (114.83 mg) as a pale yellow liquid.  $^1\text{H}$  NMR (250 MHz,  $\text{CDCl}_3$ ):  $\delta$  (ppm)= 2.05 (t,  $J_1=5.0$  Hz,  $J_2=7.5$  Hz, 4H), 3.27 (t,  $J_1=5.0$  Hz,  $J_2=7.5$  Hz, 4H), 6.55-6.60 (m, 3H), 7.20 (m, 2H);  $^{13}\text{C}$  NMR (62.5 MHz,  $\text{CDCl}_3$ ):  $\delta$  (ppm)= 25.3, 51.3, 114.7, 121.8, 130.0, 150.7.

### 1-(p-tolyl)-1H-imidazole (Table 1, 9h)

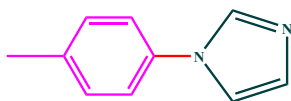

Prepared according to the general C-N coupling procedure on 1mmol scale and obtained an isolated yield of 70% (110.74 mg) as a white solid.  $^1\text{H}$  NMR (250 MHz,  $\text{CDCl}_3$ ):  $\delta$  (ppm)= 2.51 (s, 3H), 6.90 (d,  $J=7.5$  Hz, 2H), 7.12 (d,  $J=7.5$  Hz, 2H), 7.22 (d,  $J=7.5$  Hz, 2H), 7.70 (s, 1H);  $^{13}\text{C}$  NMR (62.5 MHz,  $\text{CDCl}_3$ ):  $\delta$  (ppm)= 20.5, 118.0, 123.7, 130.2, 130.7, 134.4, 135.1, 138.8.

### 4-(4-nitrophenyl)morpholine (Table 1, 9i)

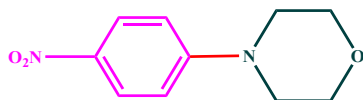

Prepared according to the general C-N coupling procedure on 1mmol scale and obtained an isolated yield of 75% (156.15 mg) as a yellow solid.  $^1\text{H}$  NMR (250 MHz,  $\text{CDCl}_3$ ):  $\delta$  (ppm)= 3.38 (t,  $J_1=4.25$  Hz,  $J_2=7.5$  Hz, 4H), 3.47 (t,  $J_1=4.25$  Hz,  $J_2=7.5$  Hz, 4H), 6.80 (m, 1H), 7.20 (m, 1H), 8.14 (m, 2H);  $^{13}\text{C}$  NMR (62.5 MHz,  $\text{CDCl}_3$ ):  $\delta$  (ppm)= 54.3, 66.5, 112.6, 124.3, 136.9, 154.2.

### 1-(4-nitrophenyl)-1H-imidazole (Table 1, 9j)

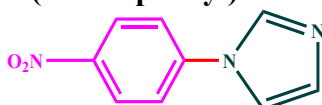

Prepared according to the general C-N coupling procedure on 1mmol scale and obtained an isolated yield of 87% (164.57 mg) as a light brown solid.  $^1\text{H}$  NMR (250 MHz,  $\text{CDCl}_3$ ):  $\delta$  (ppm)= 7.21 (d,  $J=7.7$  Hz, 1 H), 7.32 (d,  $J=7.7$  Hz, 1 H), 7.52 (d,  $J=7.5$  Hz, 2 H), 7.93 (s, 1 H), 8.30 (m, 2 H);  $^{13}\text{C}$  NMR (62.5 MHz,  $\text{CDCl}_3$ ):  $\delta$  (ppm)= 118.6, 122.0, 125.0, 130.2, 136.2, 143.1, 147.9.

### 1-(p-Tolyl)-1H-pyrrole (Table 1, 9k)

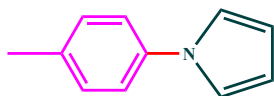

Prepared according to the general C-N coupling procedure on 1mmol scale and obtained an isolated yield of 70% (110.04 mg) as a pale yellow oil.  $^1\text{H}$  NMR (250 MHz,  $\text{CDCl}_3$ ):  $\delta$  (ppm)= 2.41 (s, 3H), 6.37 (m, 2H), 7.10 (m, 2H), 7.26 (m, 2H), 7.30-7.33 (m, 2H);  $^{13}\text{C}$  NMR (62.5 MHz,  $\text{CDCl}_3$ ):  $\delta$  (ppm)= 20.9, 110.0, 119.4, 120.5, 130.0, 135.5, 138.6.

### Diphenylacetylene (Table 2, 11a)

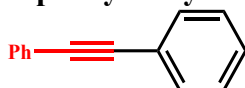

Prepared according to the general Sonogashira coupling procedure on 1mmol aryl halide scale and obtained an isolated yield of 95% (169.31 mg) as a colorless solid.  $^1\text{H}$  NMR (250 MHz,  $\text{CDCl}_3$ ):  $\delta$  (ppm)= 6.93-7.29 (m, 5H), 7.44-7.98 (m, 5H);  $^{13}\text{C}$  NMR (62.5 MHz,  $\text{CDCl}_3$ ):  $\delta$  (ppm)= 89.5, 123.4, 126.5, 127.7, 128.3, 128.5, 128.8, 129.3, 131.5.

### 1-methyl-4-(phenylethynyl)benzene (Table 2, 11b)

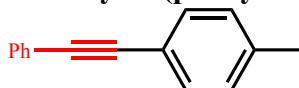

Prepared according to the general Sonogashira coupling procedure on 1mmol aryl halide scale and obtained an isolated yield of 95% (182.63 mg) as a white solid.  $^1\text{H}$  NMR (250 MHz,  $\text{CDCl}_3$ ):  $\delta$  (ppm)= 2.22 (s, 3H), 6.71-7.16 (m, 3H), 7.19-7.71 (m, 6H);  $^{13}\text{C}$  NMR (62.5 MHz,  $\text{CDCl}_3$ ):  $\delta$  (ppm)= 21.5, 88.7, 89.6, 120.2, 123.5, 128.0, 128.3, 129.1, 131.5, 131.6, 138.4.

### 2-(Phenylethynyl)aniline (Table 2, 11c)

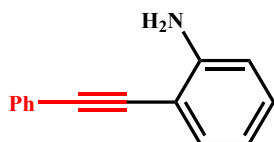

Prepared according to the general Sonogashira coupling procedure on 1mmol aryl halide scale and obtained an isolated yield of 65% (125.60 mg) as a yellowish-brown solid.  $^1\text{H}$  NMR (250 MHz,  $\text{CDCl}_3$ ):  $\delta$  (ppm)= 3.76 (s, 2 H), 6.75 (m, 2 H), 7.31-7.34 (m, 3 H), 7.46 - 7.54 (m, 4 H);  $^{13}\text{C}$  NMR (62.5 MHz,  $\text{CDCl}_3$ ):  $\delta$  (ppm)= 93.4, 108.0, 113.6, 118.8, 127.3, 127.9, 128.8, 129.0, 131.8, 133.3, 151.0.

### 3-(Phenylethynyl)aniline (Table 2, 11d)

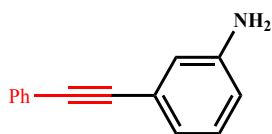

Prepared according to the general Sonogashira coupling procedure on 1mmol aryl halide scale and obtained an isolated yield of 68% (131.40 mg) as a yellow pale oil.  $^1\text{H}$  NMR (250 MHz,  $\text{CDCl}_3$ ):  $\delta$ (ppm)= 3.79 (s, 2H), 7.25-7.37 (m, 6H), 7.52-7.54 (m, 4H).  $^{13}\text{C}$  NMR (62.5 MHz,  $\text{CDCl}_3$ ):  $\delta$ (ppm)= 74.0, 81.7, 121.9, 128.4, 128.5, 129.3, 132.6.

#### 4-(phenylethynyl)aniline (Table 2, 11e)

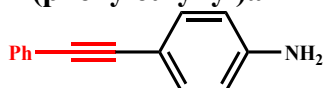

Prepared according to the general Sonogashira coupling procedure on 1mmol aryl halide scale and obtained an isolated yield of 78% (150.72 mg) as a yellow oil.  $^1\text{H}$  NMR (250 MHz,  $\text{CDCl}_3$ ):  $\delta$  (ppm)= 3.63 (s, 2H,  $\text{NH}_2$ ), 6.53 (m, 3H), 7.29-7.40 (m, 5H).  $^{13}\text{C}$  NMR (62.5 MHz,  $\text{CDCl}_3$ ):  $\delta$  (ppm)= 87.4, 90.2, 112.6, 115.0, 124.0, 127.8, 128.3, 131.4, 133.0, 146.8.

#### 4-(phenylethynyl)benzaldehyde (Table 2, 11f)

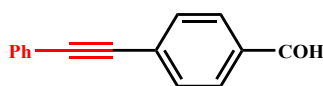

Prepared according to the general Sonogashira coupling procedure on 1mmol aryl halide scale and obtained an isolated yield of 97% (200.05 mg) as a brown oil.  $^1\text{H}$  NMR (250 MHz,  $\text{CDCl}_3$ ):  $\delta$  (ppm)= 7.28–7.34 (m, 7 H), 7.55 (m, 1 H), 7.96 (m, 1 H), 10.55 (s, 1 H);  $^{13}\text{C}$  NMR (62.5 MHz,  $\text{CDCl}_3$ ):  $\delta$  (ppm)= 126.6, 127.3, 128.0, 129.4, 129.7, 129.8, 130.7, 133.3, 135.2, 135.4, 190.0.

#### 1-methyl-2-(phenylethynyl)benzene (Table 2, 11g)

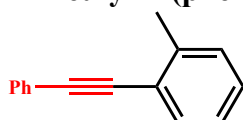

Prepared according to the general Sonogashira coupling procedure on 1mmol aryl halide scale and obtained an isolated yield of 80% (153.80 mg) as a colorless oil.  $^1\text{H}$  NMR (250 MHz,  $\text{CDCl}_3$ ):  $\delta$  (ppm)= 2.75 (s, 3H), 7.10–7.23 (m, 1H), 7.28-7.33 (m, 2H), 7.30–7.40 (m, 3H), 7.49–7.60 (m, 3H);  $^{13}\text{C}$  NMR (62.5 MHz,  $\text{CDCl}_3$ ):  $\delta$  (ppm)= 20.8, 123.0, 125.6, 128.2, 128.3, 129.3, 129.5, 131.5, 131.8, 132.5, 140.1.

#### 4-(Phenylethynyl)benzoic acid (Table 2, 11h)

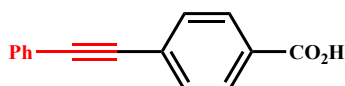

Prepared according to the general Sonogashira coupling procedure on 1mmol aryl halide scale and obtained an isolated yield of 97% (215.56 mg) as a brown solid.  $^1\text{H}$  NMR (250 MHz,  $\text{DMSO}-d_6$ ):  $\delta$  (ppm)= 7.49 (3H, m), 7.70-8.04 (6H, m), 12.98 (1H, s);  $^{13}\text{C}$  NMR (62.5 MHz,  $\text{DMSO}-d_6$ ):  $\delta$  (ppm)= 127.3, 127.5, 129.0, 129.6, 130.0, 130.5, 140.0, 145.1, 167.7.

### 1-nitro-4-(phenylethynyl)benzene (Table 2, 11i)

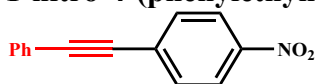

Prepared according to the general Sonogashira coupling procedure on 1mmol aryl halide scale and obtained an isolated yield of 98% (218.76 mg) as a white solid.  $^1\text{H NMR}$  (250 MHz,  $\text{CDCl}_3$ ):  $\delta$  (ppm)= 6.66-7.41 (m, 3H), 7.54-7.69 (m, 4H), 8.22 (d,  $J=7.7$  Hz, 2H);  $^{13}\text{C NMR}$  (62.5 MHz,  $\text{CDCl}_3$ ):  $\delta$  (ppm)= 87.5, 94.8, 122.0, 123.6, 128.5, 129.3, 130.2, 132.0, 132.3, 147.0.

### 1-Nitro-2-(phenylethynyl)benzene (Table 2, 11j)

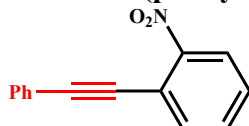

Prepared according to the general Sonogashira coupling procedure on 1mmol aryl halide scale and obtained an isolated yield of 92% (205.37 mg) as a orange oil.  $^1\text{H NMR}$  (250 MHz,  $\text{CDCl}_3$ ):  $\delta$  (ppm)= 7.35-7.41 (m, 5H), 7.55-7.57 (m, 4H);  $^{13}\text{C NMR}$  (62.5 MHz,  $\text{CDCl}_3$ ):  $\delta$  (ppm)= 74.0, 82.1, 121.7, 128.5, 129.2, 132.7.

### 4-(phenylethynyl)benzonitrile (Table 2, 11k)

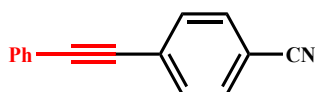

Prepared according to the general Sonogashira coupling procedure on 1mmol aryl halide scale and obtained an isolated yield of 95% (193.06 mg) as a pale yellow solid.  $^1\text{H NMR}$  (250 MHz,  $\text{CDCl}_3$ ):  $\delta$  (ppm)= 7.28-7.31 (m, 3H), 7.45-7.54 (m, 6H);  $^{13}\text{C NMR}$  (62.5 MHz,  $\text{CDCl}_3$ ):  $\delta$  (ppm)= 87.7, 93.8, 114.1, 118.6, 122.2, 128.2, 129.0, 129.5, 130.7, 132.0, 132.5.

### Biphenyl (Table 3, 12a)

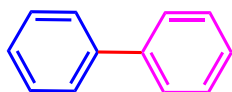

Prepared according to the general Suzuki coupling procedure on 1mmol aryl halide scale and obtained an isolated yield of 91% (140.33 mg) as a white solid.  $^1\text{H NMR}$  (250MHz,  $\text{CDCl}_3$ ):  $\delta$  (ppm)= 7.34 (m, 2H), 7.44 (m, 4H), 7.58-7.60 (m, 4H);  $^{13}\text{C NMR}$  (62.5 MHz,  $\text{CDCl}_3$ ):  $\delta$ (ppm)= 127.2, 127.3, 129.0, 141.3.

### 4-Methylbiphenyl (Table 3, 12b)

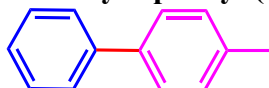

Prepared according to the general Suzuki coupling procedure on 1mmol aryl halide scale and obtained an isolated yield of 90% (151.40 mg) as a white solid.  $^1\text{H NMR}$  (250MHz,  $\text{CDCl}_3$ ):  $\delta$  (ppm)= 2.44 (s, 3H), 7.28 (m, 2H), 7.36 (m, 1H), 7.45-54 (m, 4H), 7.62 (m, 2H);  $^{13}\text{C NMR}$  (62.5 MHz,  $\text{CDCl}_3$ ):  $\delta$  (ppm)= 21.1, 127.0, 127.1, 129.0, 129.6, 137.0, 137.1, 138.6, 141.2.

### 2-Aminobiphenyl (Table 3, 12c)

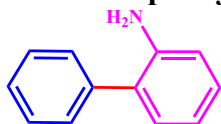

Prepared according to the general Suzuki coupling procedure on 1mmol aryl halide scale and obtained an isolated yield of 68% (115.06 mg) as a white solid.  $^1\text{H}$  NMR (250 MHz,  $\text{CDCl}_3$ ):  $\delta(\text{ppm})= 5.00$  (s, br, 2H), 6.73-6.82 (m, 2H), 7.28-7.50 (m, 5H), 7.50-7.66 (m, 2H), 8.59 (m, 1H).  $^{13}\text{C}$  NMR (62.5 MHz,  $\text{CDCl}_3$ ):  $\delta(\text{ppm})= 85.2, 94.8, 109.6, 115.1, 118.9, 122.9, 127.9, 128.0, 129.4, 131.1, 132.0, 145.7$

### 3-Aminobiphenyl (Table 3, 12d)

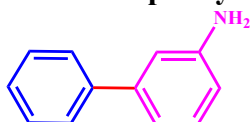

Prepared according to the general Suzuki coupling procedure on 1mmol aryl halide scale and obtained an isolated yield of 72% (121.83 mg) as a white solid.  $^1\text{H}$  NMR (250 MHz,  $\text{CDCl}_3$ ):  $\delta(\text{ppm})= 3.73$  (s, 2H), 7.33-7.39 (m, 6H), 7.50-7.58 (m, 1H), 7.86-8.86 (m, 2H).  $^{13}\text{C}$  NMR (62.5 MHz,  $\text{CDCl}_3$ ):  $\delta(\text{ppm})= 114.4, 118.5, 118.6, 127.3, 127.5, 130.1, 140.0, 140.7, 149.8$ .

### 4-Aminobiphenyl (Table 3, 12e)

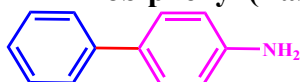

Prepared according to the general Suzuki coupling procedure on 1mmol aryl halide scale and obtained an isolated yield of 79% (133.68 mg) as a pale yellow solid.  $^1\text{H}$  NMR (250 MHz,  $\text{CDCl}_3$ ):  $\delta(\text{ppm})= 3.54$  (s, 2H,  $\text{NH}_2$ ), 6.66 (d,  $J=4.75$  Hz, 2H), 7.32-7.36 (m, 5H), 7.37 (m, 2H), 7.59 (d,  $J = 7.80$  Hz, ArH);  $^{13}\text{C}$  NMR (62.5 MHz,  $\text{CDCl}_3$ ):  $\delta(\text{ppm})= 87.4, 90.1, 112.7, 114.8, 124.0, 127.7, 128.3, 131.4, 133.0, 146.7$ .

### 4-Phenylbenzaldehyde (Table 3, 12f)

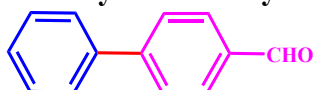

Prepared according to the general Suzuki coupling procedure on 1mmol aryl halide scale and obtained an isolated yield of 92% (167.64 mg) as a yellow solid.  $^1\text{H}$  NMR (250 MHz,  $\text{CDCl}_3$ ):  $\delta(\text{ppm})= 7.28$  (m, 3H), 7.52 (m, 2H), 7.65 (m, 2H), 7.98 (m, 2H), 10.08 (s, 1H),  $^{13}\text{C}$  NMR (62.5 MHz,  $\text{CDCl}_3$ ):  $\delta(\text{ppm})= 127.3, 127.7, 128.5, 130.0, 130.2, 135.3, 140.0, 147.2, 192.0$ .

### 2-Methylbiphenyl (Table 3, 12g)

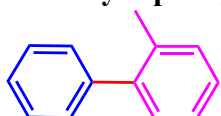

Prepared according to the general Suzuki coupling procedure on 1mmol aryl halide scale and obtained an isolated yield of 72% (121.12 mg) as a white solid.  $^1\text{H}$  NMR (250 MHz,  $\text{CDCl}_3$ ):  $\delta(\text{ppm})= 2.26$  (s, 3H), 7.28 (m, 3H), 7.38 (m, 3H), 7.48 (m, 3H);  $^{13}\text{C}$  NMR (62.5 MHz,  $\text{CDCl}_3$ ):  $\delta(\text{ppm})= 20.6, 125.9, 126.9, 127.3, 128.2, 128.9, 129.3, 129.9, 130.4, 135.4, 142.1$ .

#### 4-phenylbenzoic acid (Table 3, 12h)

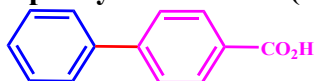

Prepared according to the general Suzuki coupling procedure on 1mmol aryl halide scale and obtained an isolated yield of 92% (182.36 mg) as a white solid.  $^1\text{H}$  NMR (250 MHz, DMSO- $d_6$ ):  $\delta$ (ppm)= 7.41 (m, 1H), 7.59 (m, 2H), 7.80 (m, 2H), 7.85 (d, 2H), 8.12 (d,  $J$  = 4.25 Hz, 2H), 13.20 (s, 1H);  $^{13}\text{C}$  NMR (62.5 MHz, DMSO- $d_6$ ):  $\delta$ (ppm)= 126.7, 127.0, 128.2, 129.0, 129.9, 130.6, 139.2, 143.6, 167.4.

#### 4-Nitrobiphenyl (Table 3, 12i)

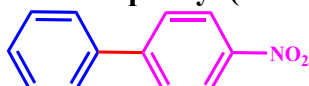

Prepared according to the general Suzuki coupling procedure on 1mmol aryl halide scale and obtained an isolated yield of 93% (185.25 mg) as a white solid.  $^1\text{H}$  NMR (250 MHz,  $\text{CDCl}_3$ ):  $\delta$  (ppm)= 7.45-7.76 (m, 7H), 8.31 (m, 2H);  $^{13}\text{C}$  NMR (62.5 MHz,  $\text{CDCl}_3$ ):  $\delta$  (ppm)= 125.0, 127.6, 128.0, 128.9, 129.5, 129.7, 141.1, 147.9.

#### 2-Nitrobiphenyl (Table 3, 12j)

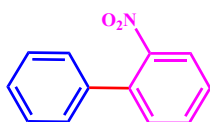

Prepared according to the general Suzuki coupling procedure on 1mmol aryl halide scale and obtained an isolated yield of 91% (181.27 mg) as a pale yellow solid.  $^1\text{H}$  NMR (250 MHz,  $\text{CDCl}_3$ ):  $\delta$  (ppm)= 7.43-7.52 (m, 3H), 7.58-7.64 (m, 3H), 7.91-8.44 (m, 3H);  $^{13}\text{C}$  NMR (62.5 MHz,  $\text{CDCl}_3$ ):  $\delta$  (ppm)= 121.9, 122.0, 127.2, 128.6, 129.2, 129.8, 133.0, 136.7, 142.9, 148.8.

#### 4-Cyanobiphenyl (Table 3, 12k)

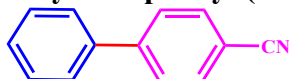

Prepared according to the general Suzuki coupling procedure on 1mmol aryl halide scale and obtained an isolated yield of 91% (163.09 mg) as a white solid.  $^1\text{H}$  NMR (250 MHz,  $\text{CDCl}_3$ ):  $\delta$  (ppm)= 7.41-7.48 (m, 3H), 7.58-7.76 (m, 6H);  $^{13}\text{C}$  NMR (62.5 MHz,  $\text{CDCl}_3$ ):  $\delta$  (ppm)= 110.9, 118.7, 127.4, 127.6, 128.8, 129.0, 129.3, 129.6, 130.0, 130.5, 132.2, 139.9, 146.2.

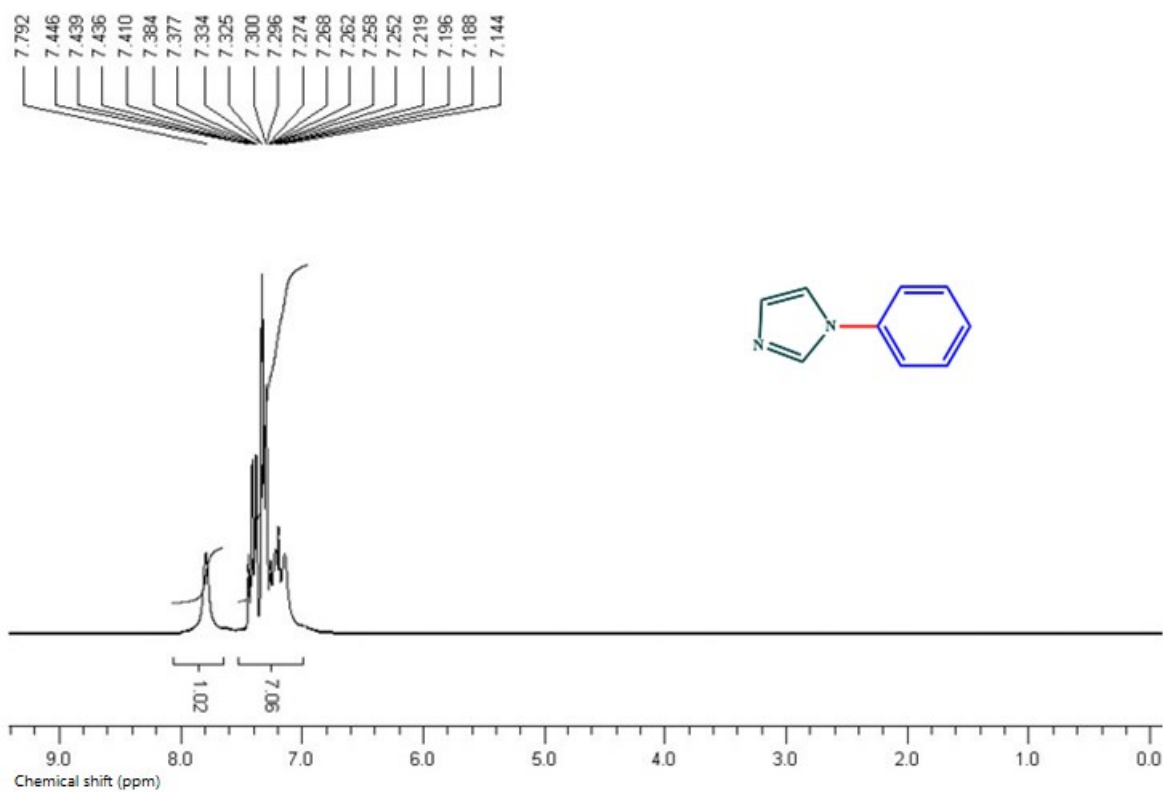

Figure S10.  $^1\text{H}$ NMR spectrum of **9a**

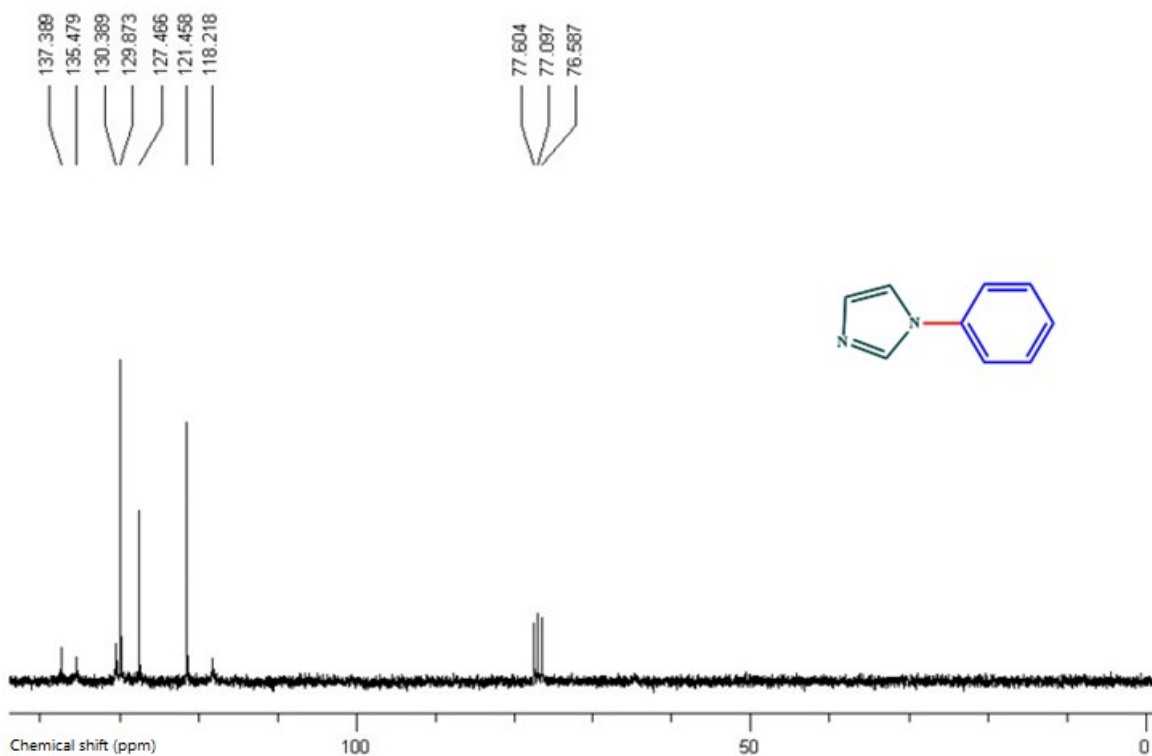

Figure S11.  $^{13}\text{C}$ NMR spectrum of **9a**



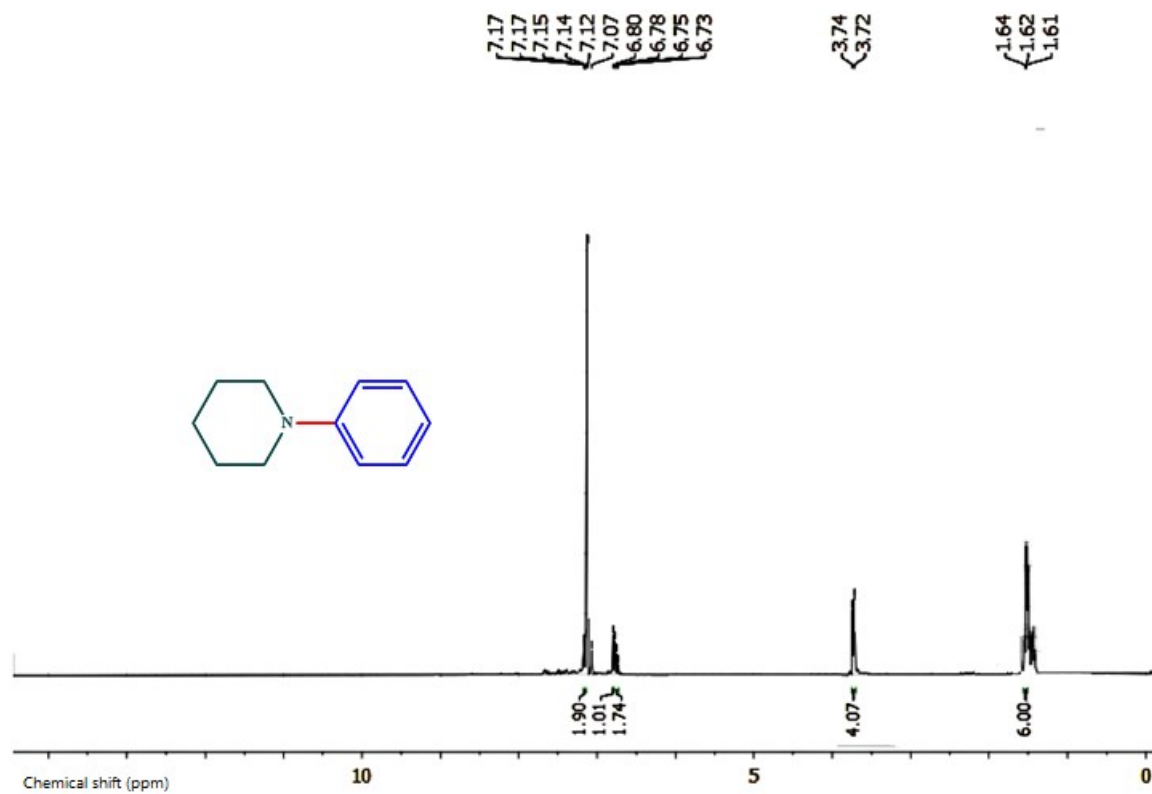

Figure S12. <sup>1</sup>H NMR spectrum of 9b

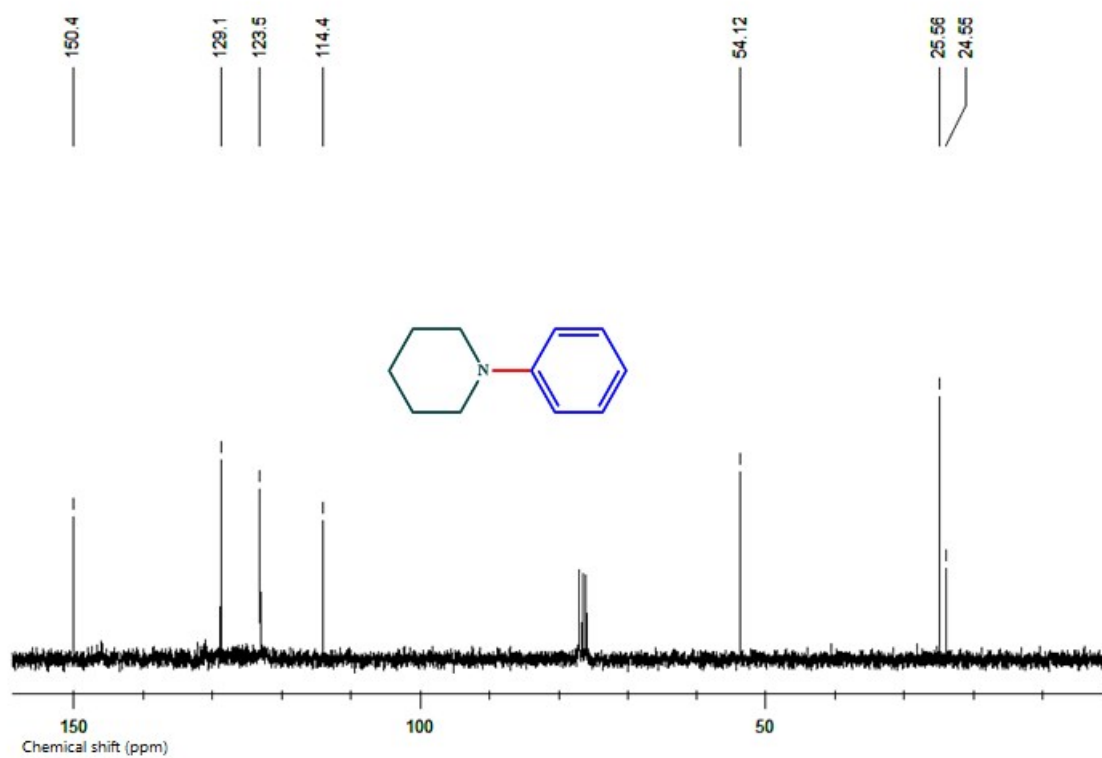

Figure S13. <sup>13</sup>C NMR spectrum of 9b

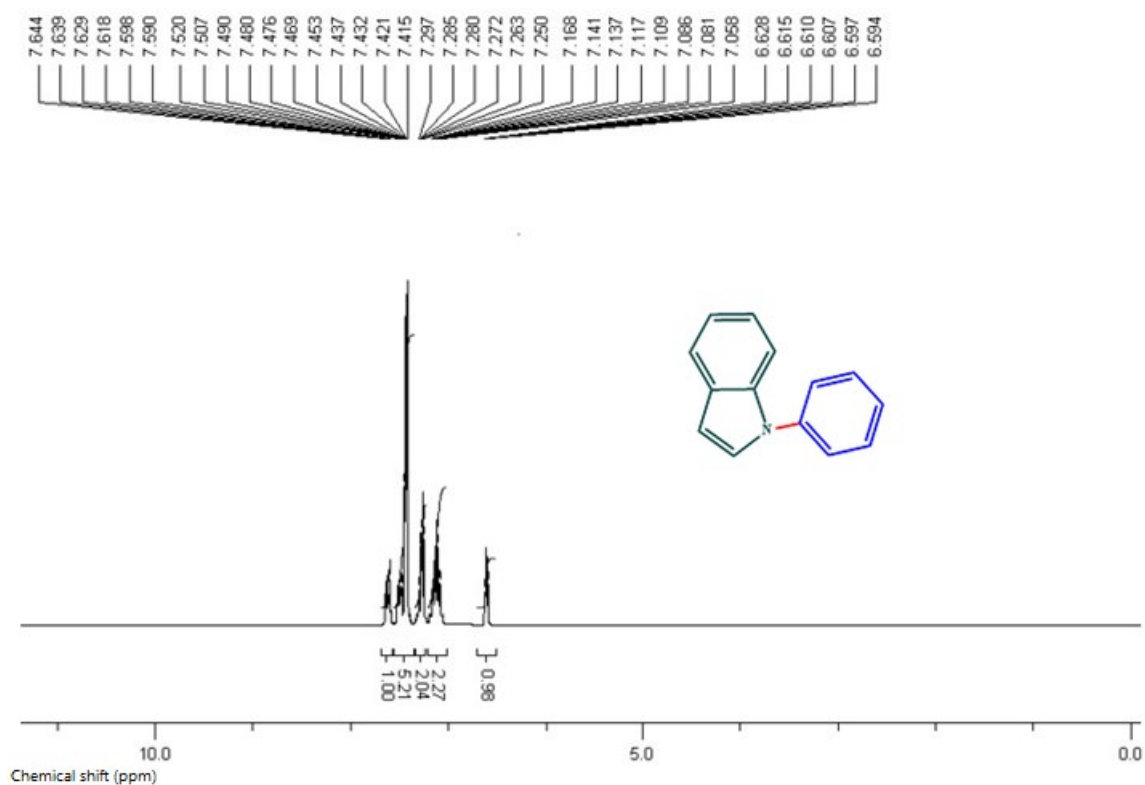

Figure S14. <sup>1</sup>H NMR spectrum of 9c

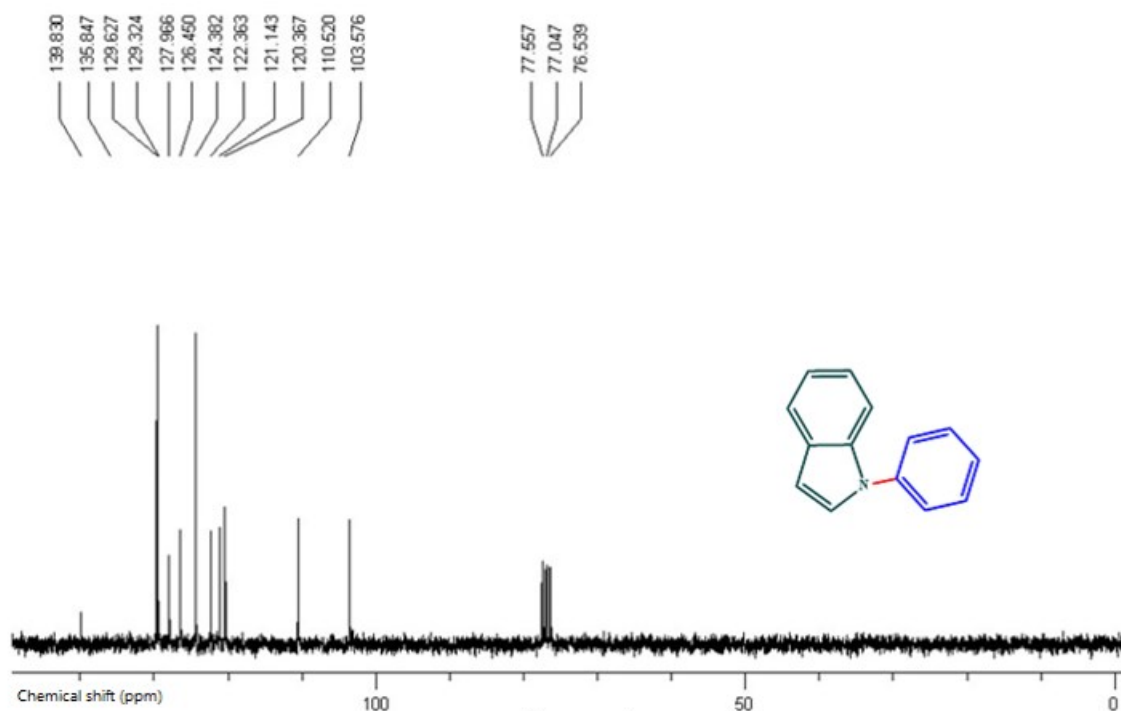

Figure S15. <sup>13</sup>C NMR spectrum of 9c

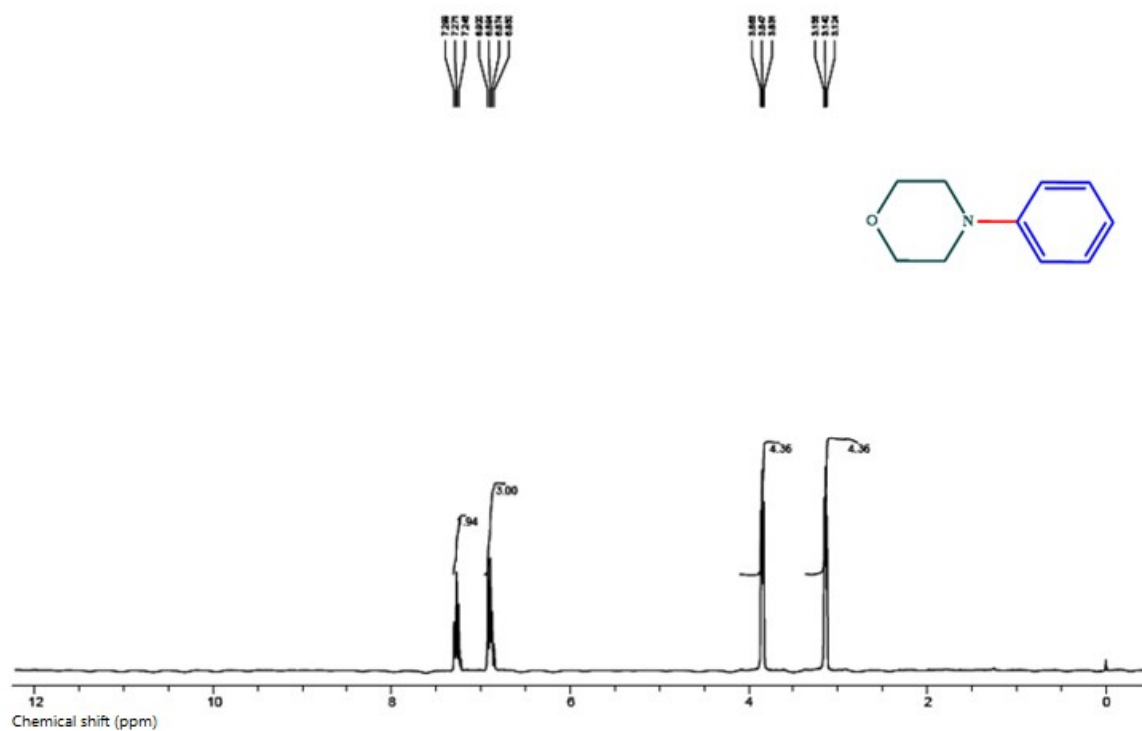

Figure S16.  $^1\text{H}$ NMR spectrum of **9d**

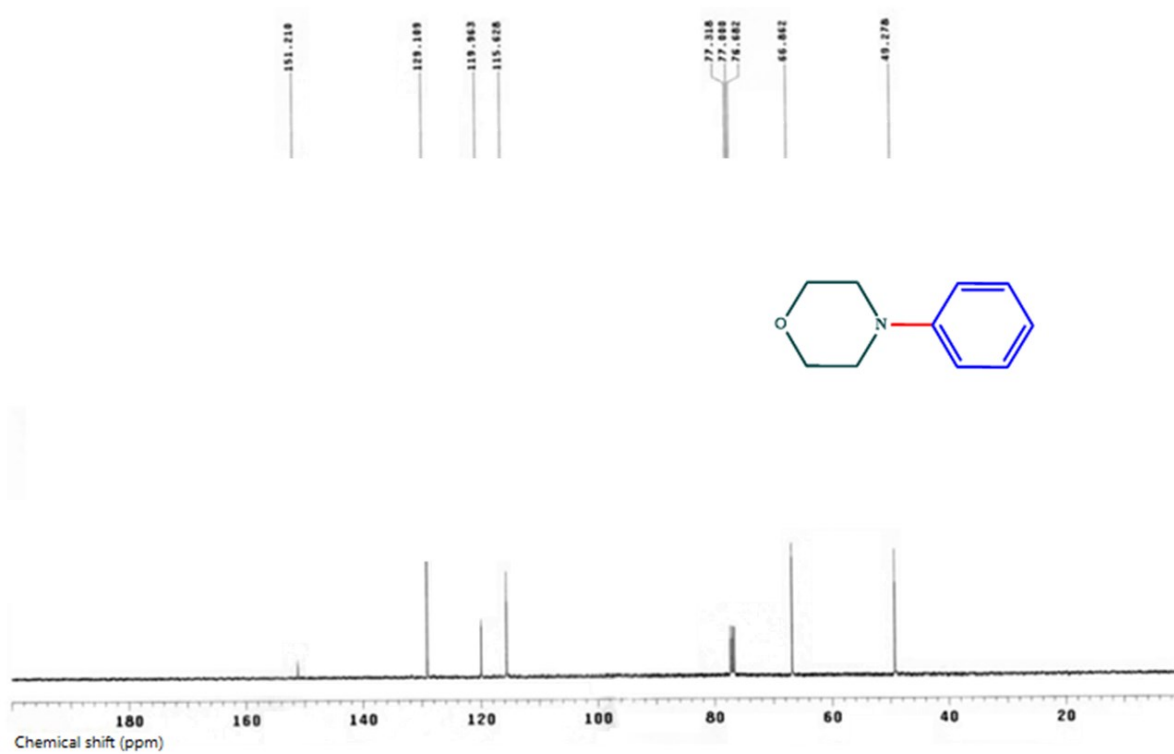

Figure S17.  $^{13}\text{C}$ NMR spectrum of **9d**

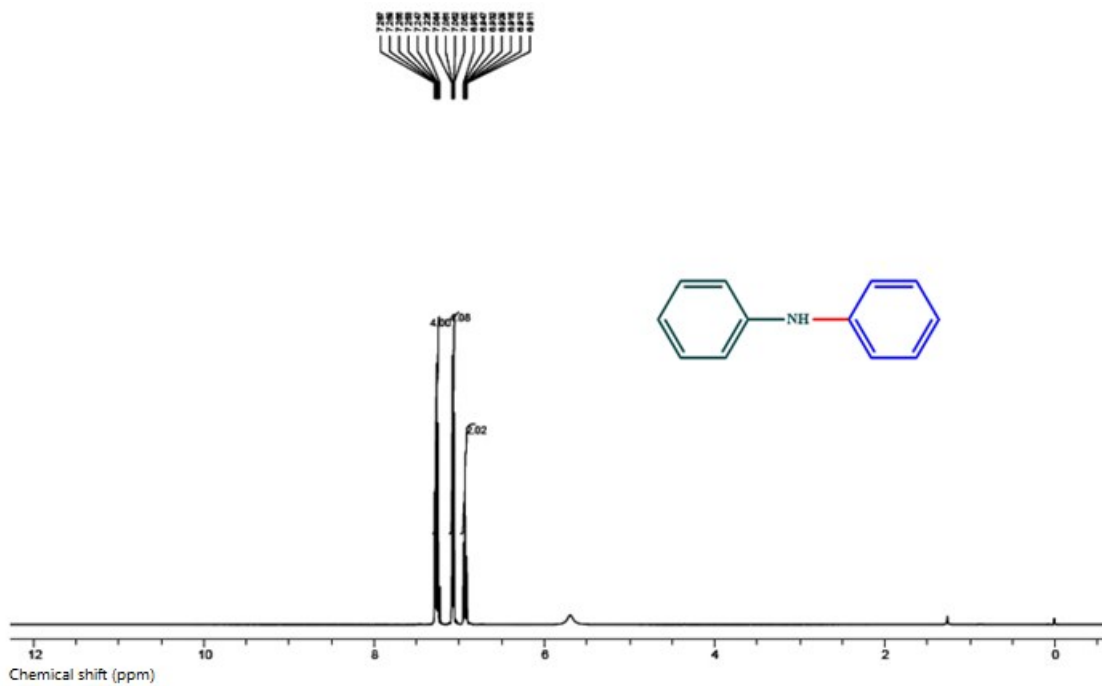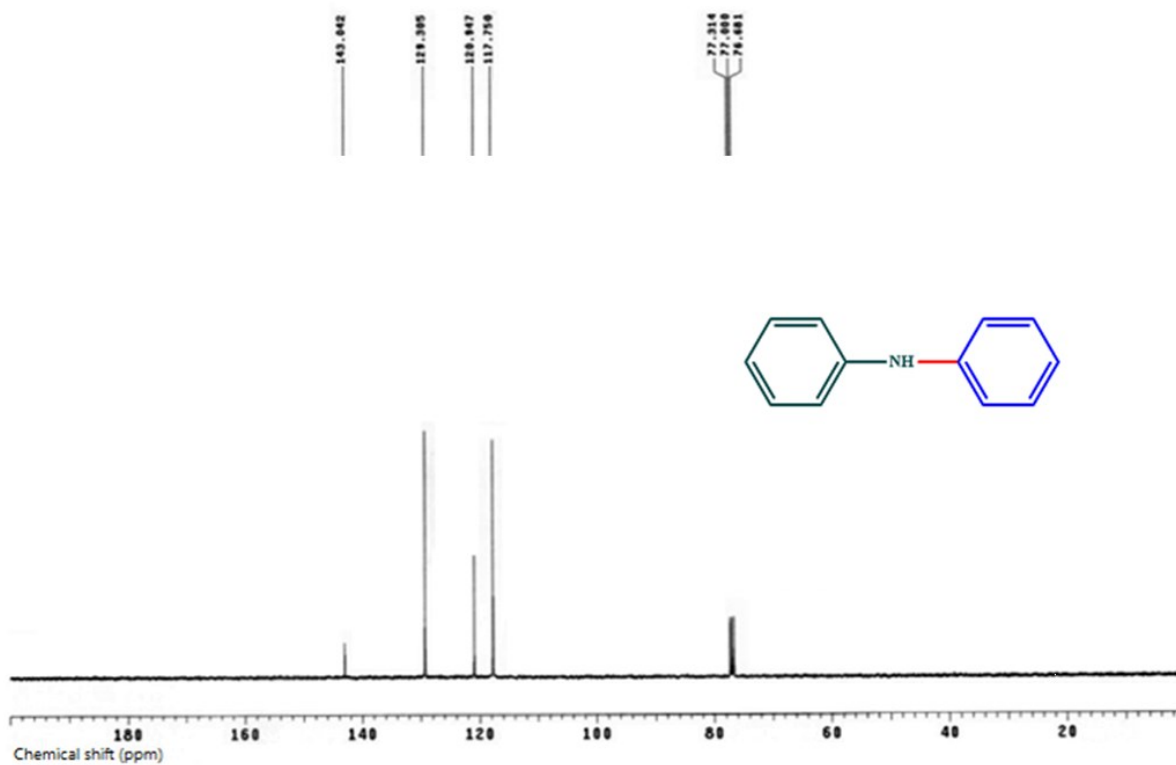

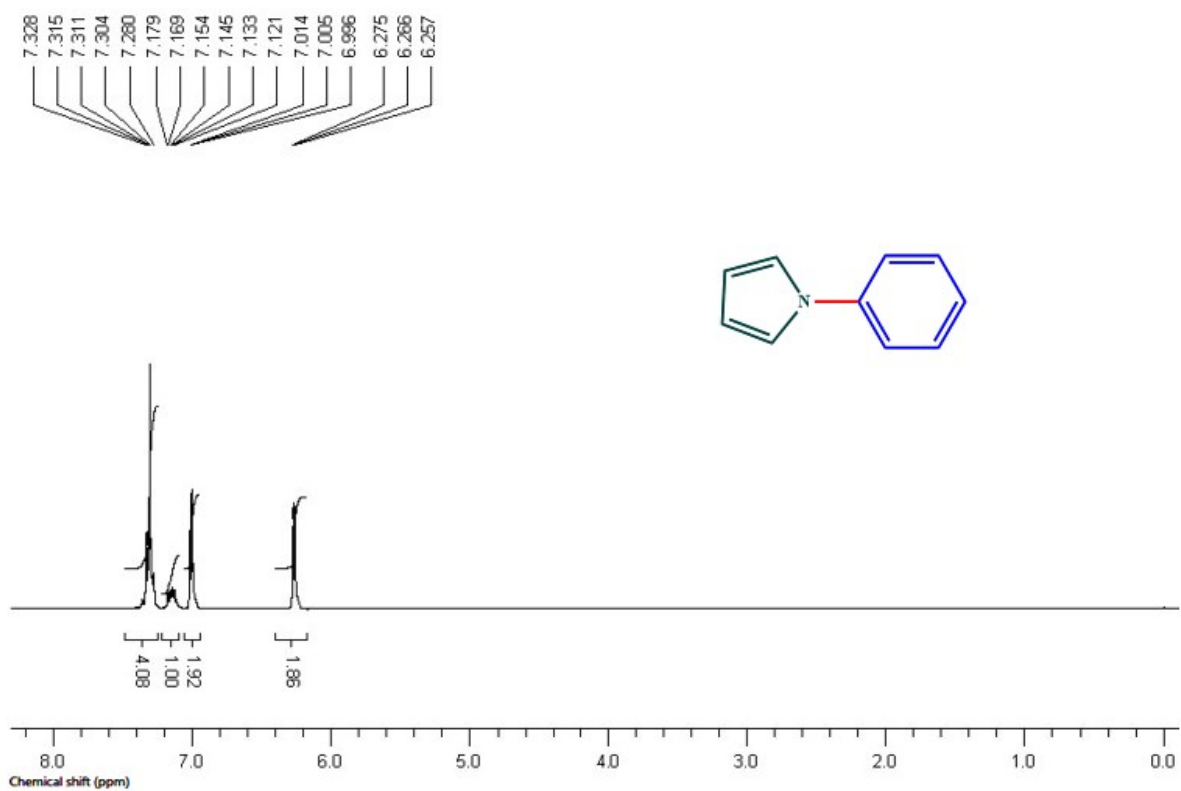

Figure S20.  $^1\text{H}$ NMR spectrum of **9f**

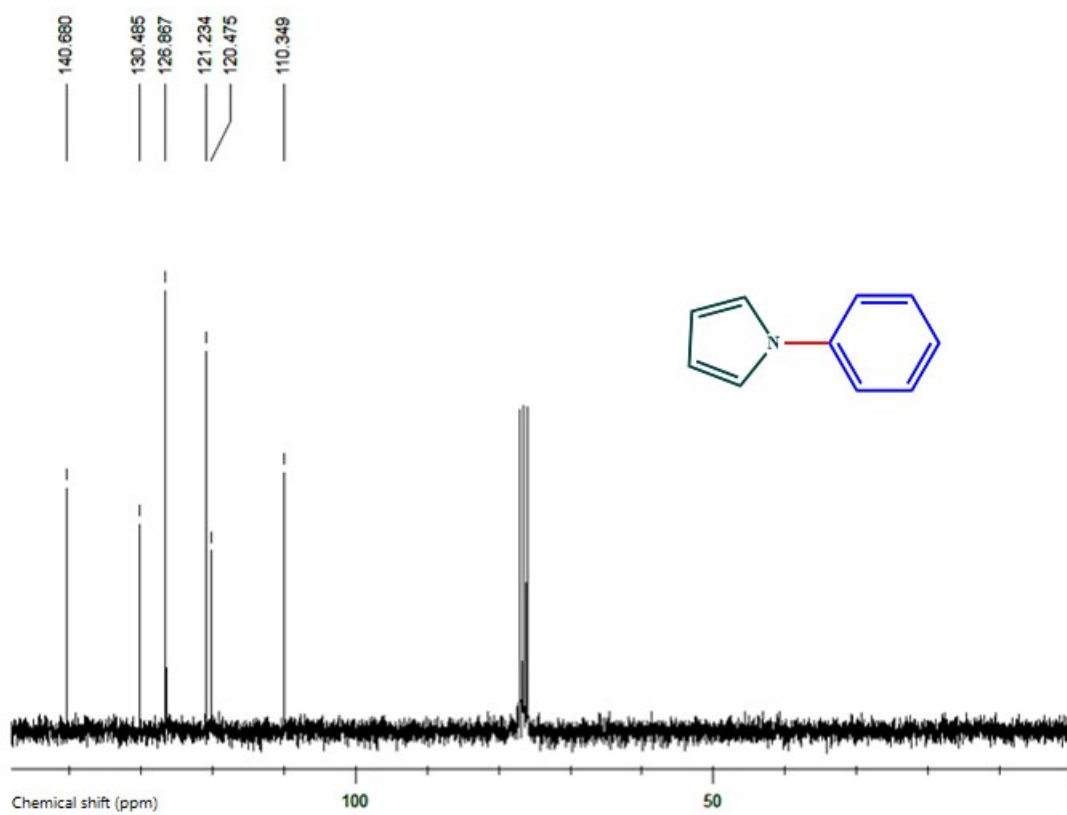

Figure S21.  $^{13}\text{C}$ NMR spectrum of **9f**

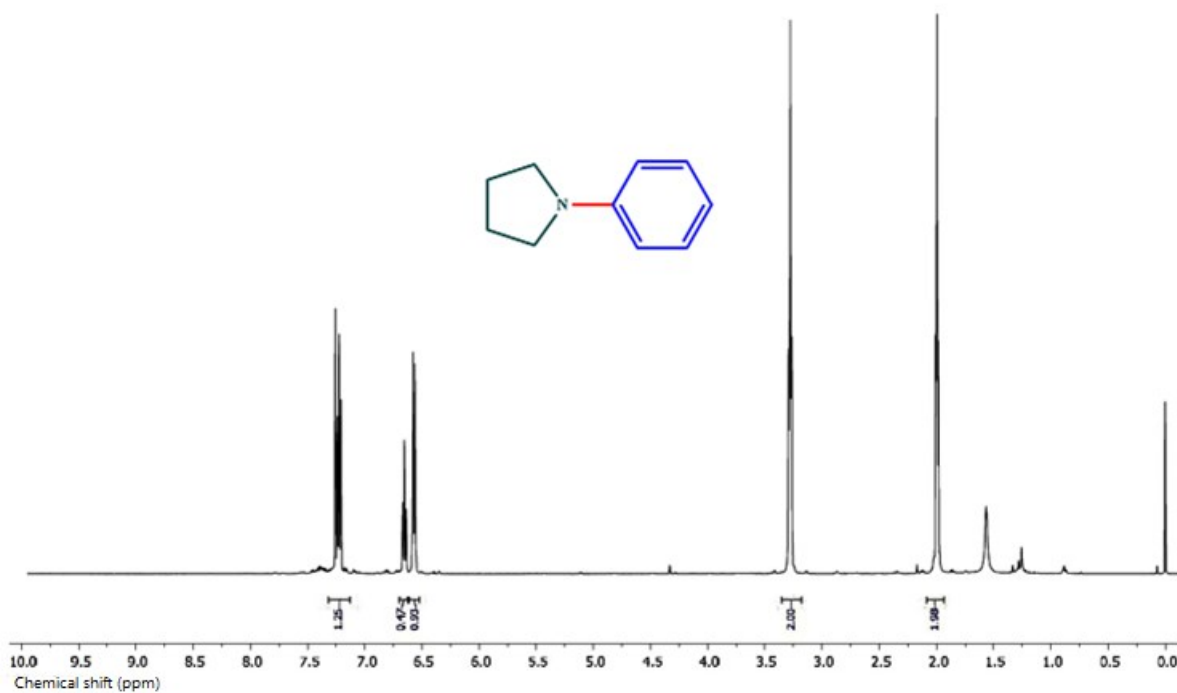

Figure S22.  $^1\text{H}$ NMR spectrum of **9g**

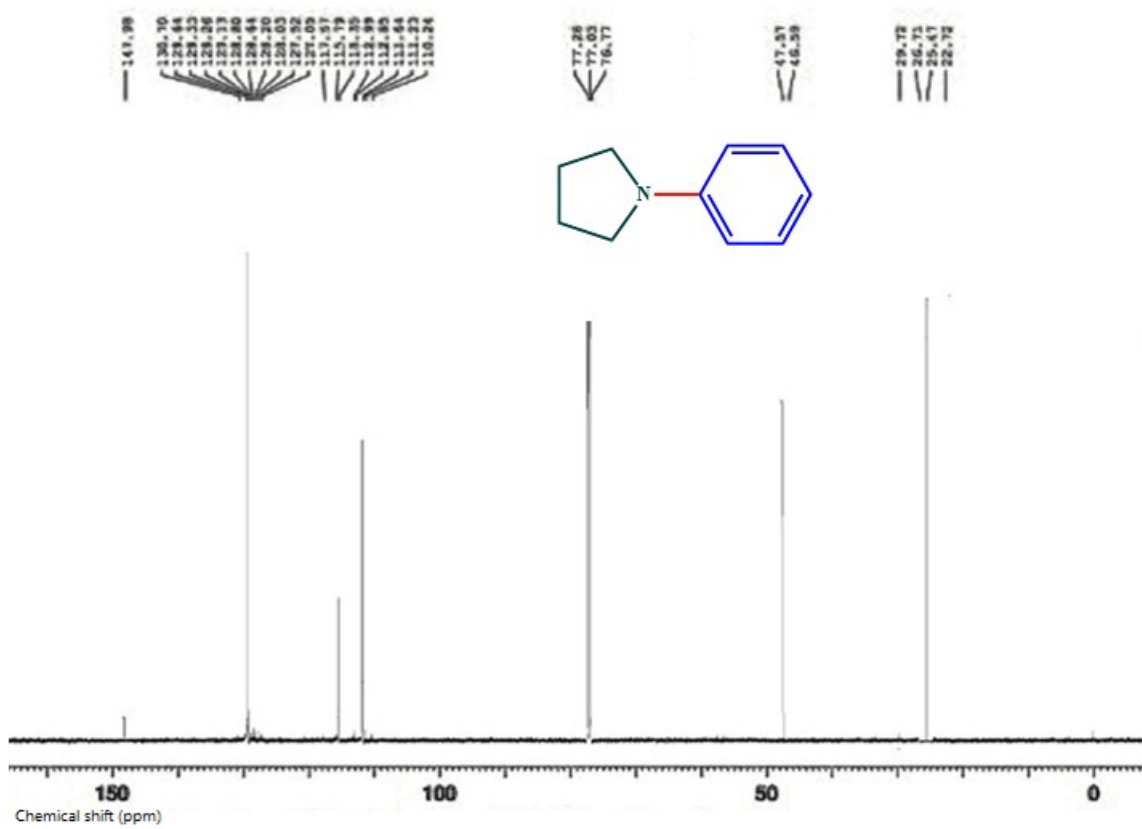

Figure S23.  $^{13}\text{C}$ NMR spectrum of **9g**

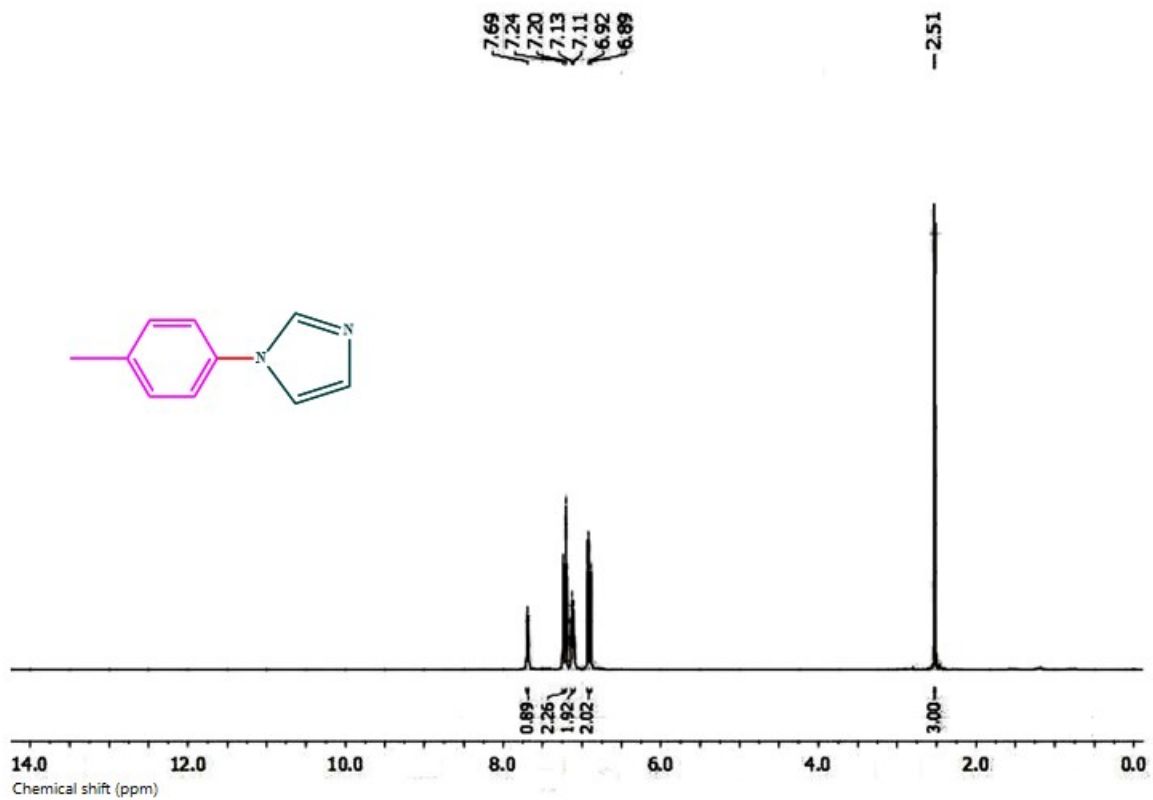

Figure S24. <sup>1</sup>H NMR spectrum of 9h

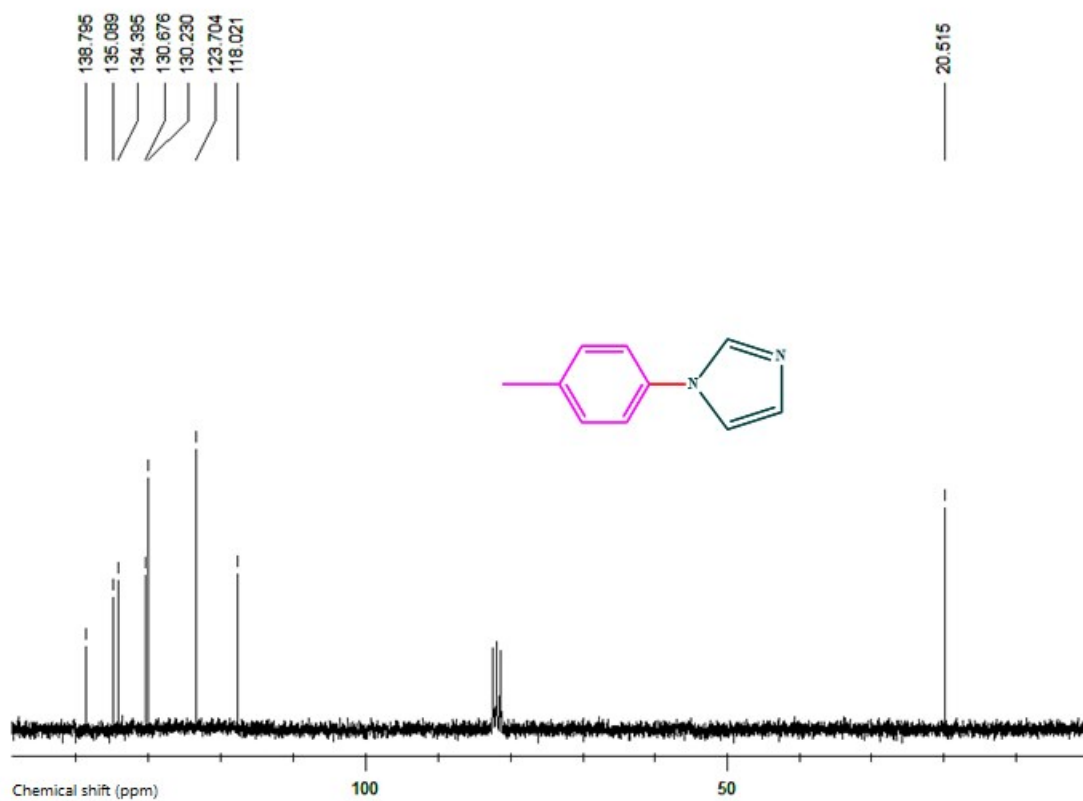

Figure S25. <sup>13</sup>C NMR spectrum of 9h

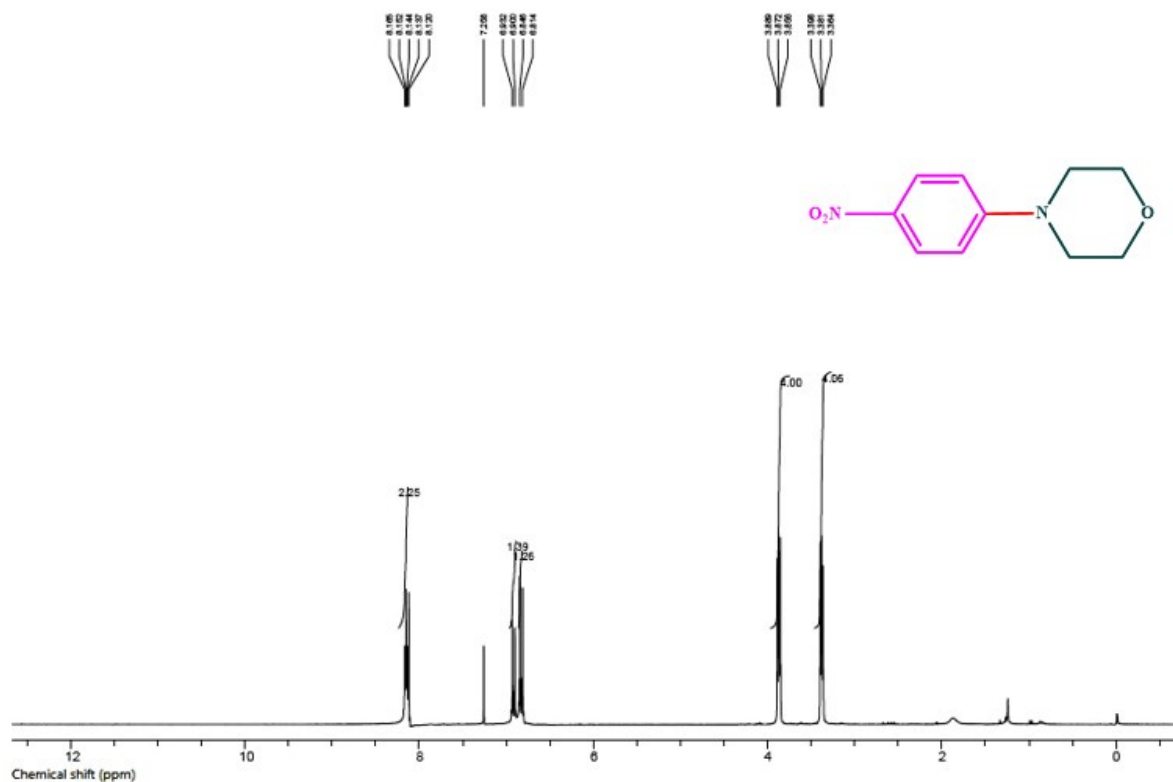

Figure S26. <sup>1</sup>H NMR spectrum of 9i

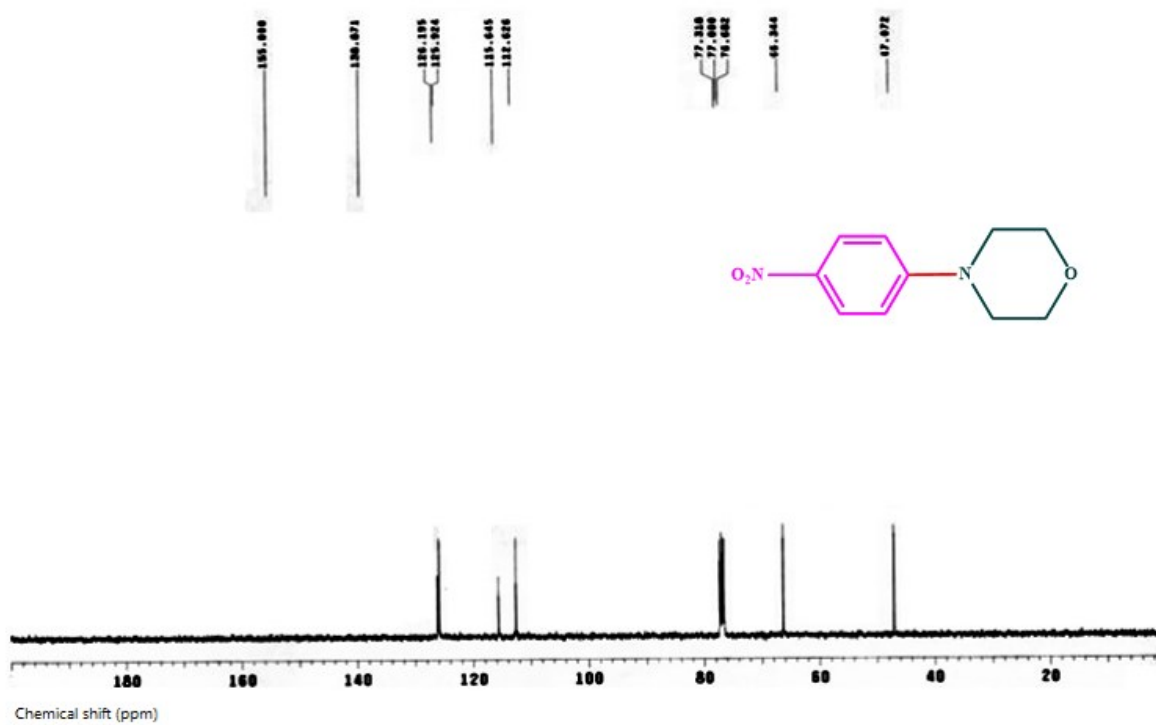

Figure S27. <sup>13</sup>C NMR spectrum of 9i



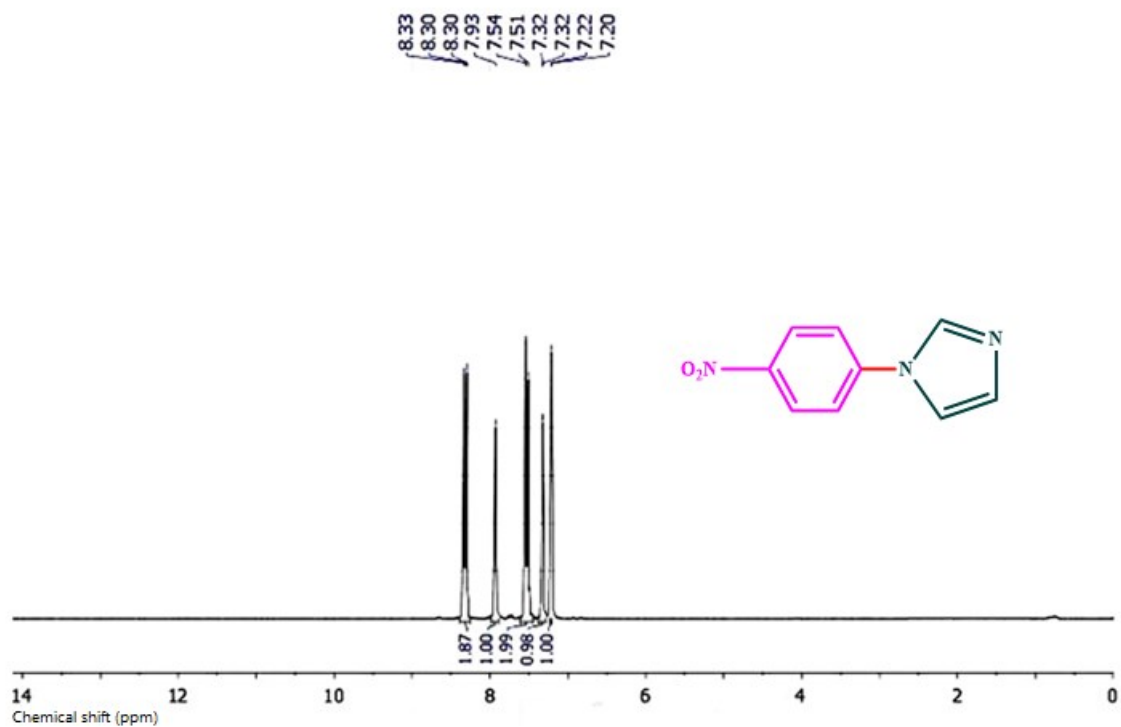

Figure S28.  $^1\text{H}$ NMR spectrum of **9j**

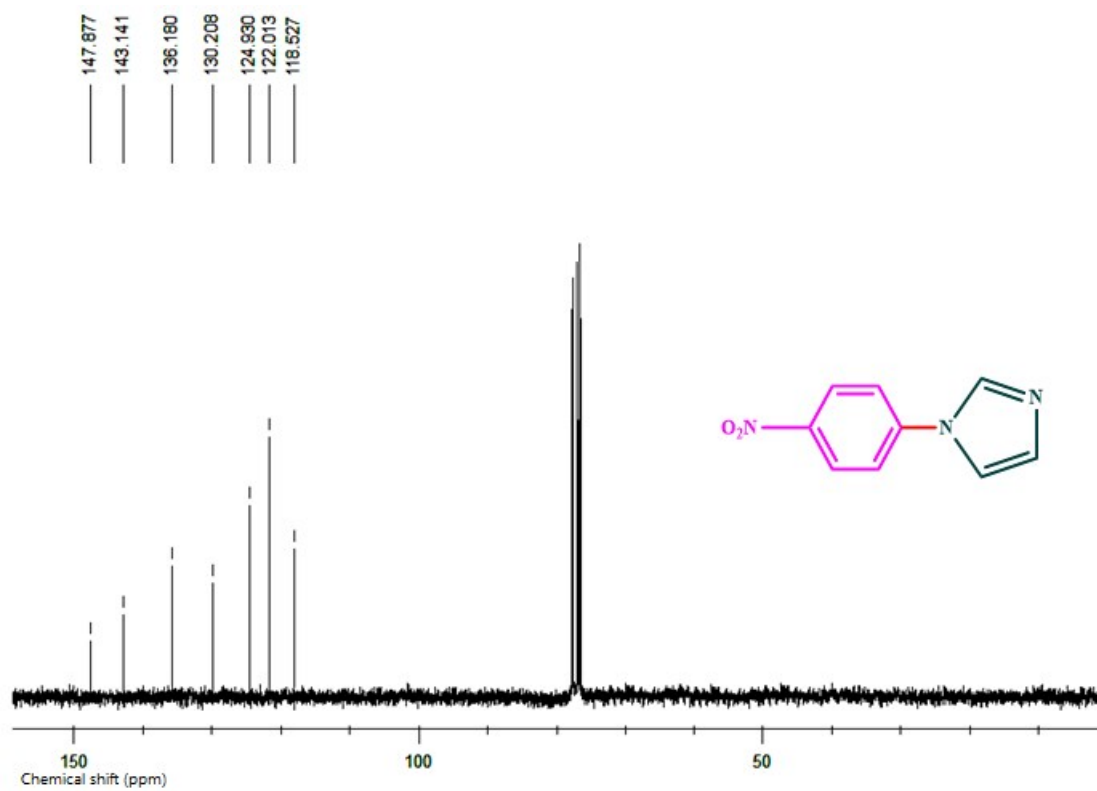

Figure S29.  $^{13}\text{C}$ NMR spectrum of **9j**

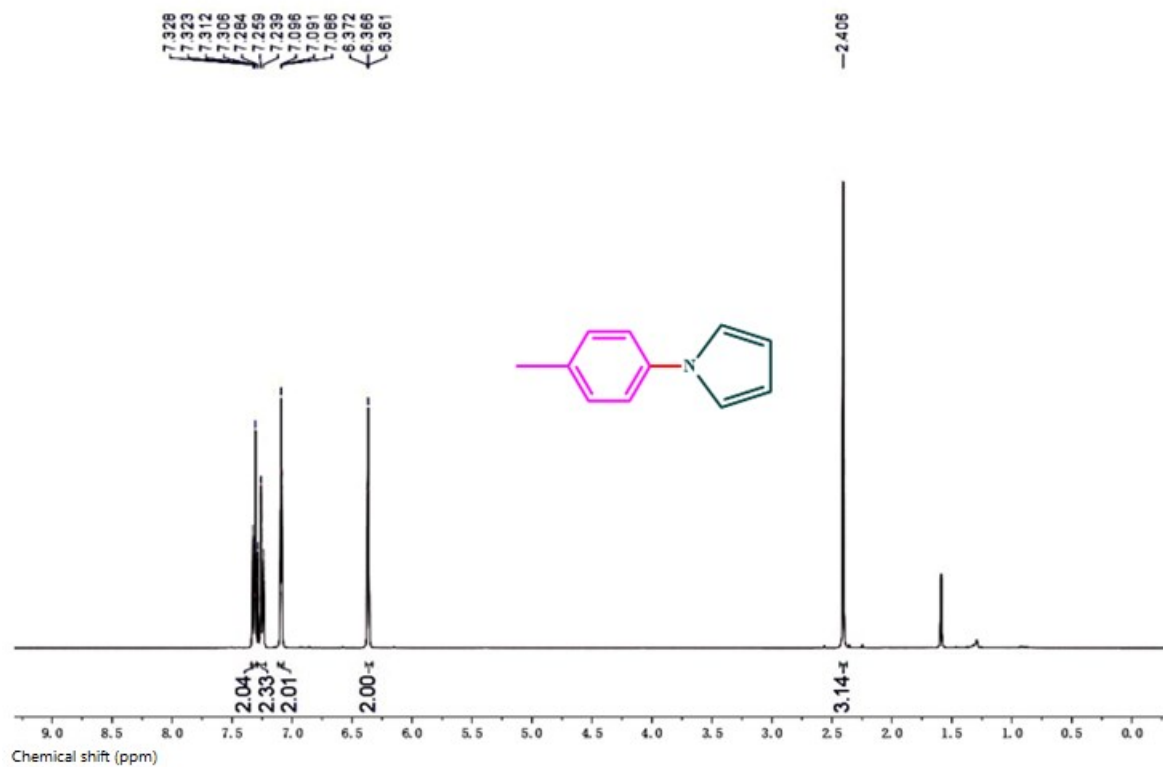

Figure S30. <sup>1</sup>H NMR spectrum of **9k**

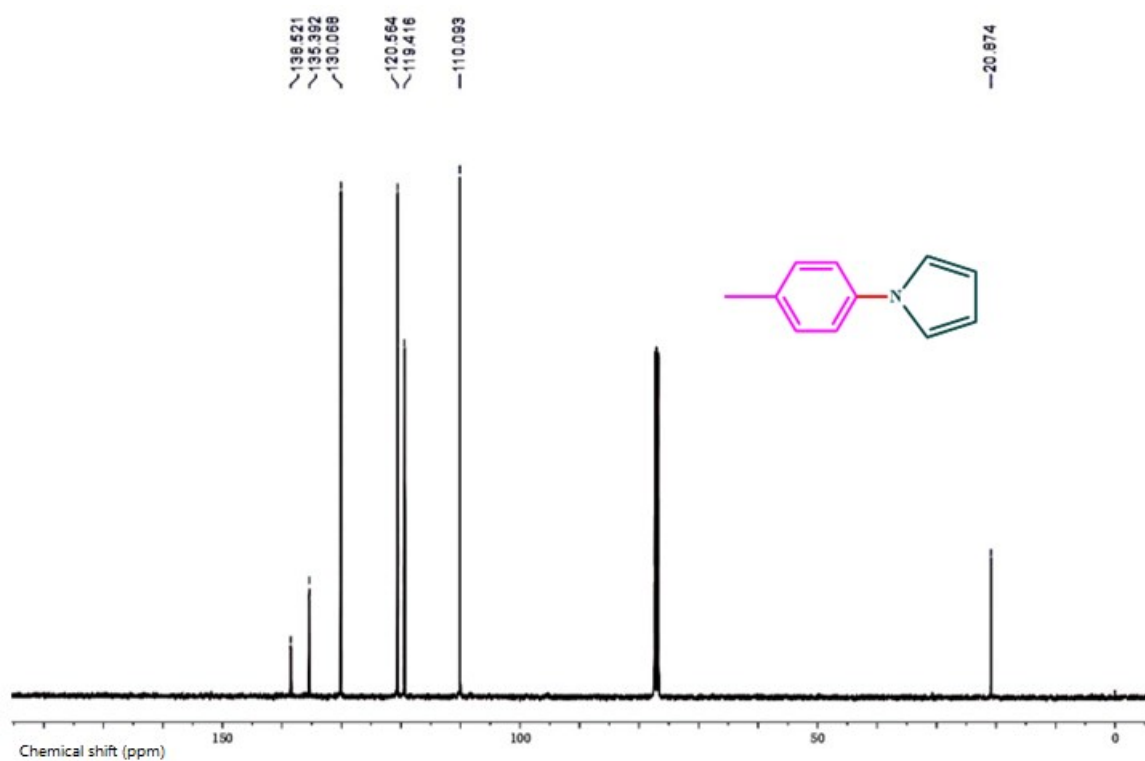

Figure S31. <sup>13</sup>C NMR spectrum of **9k**

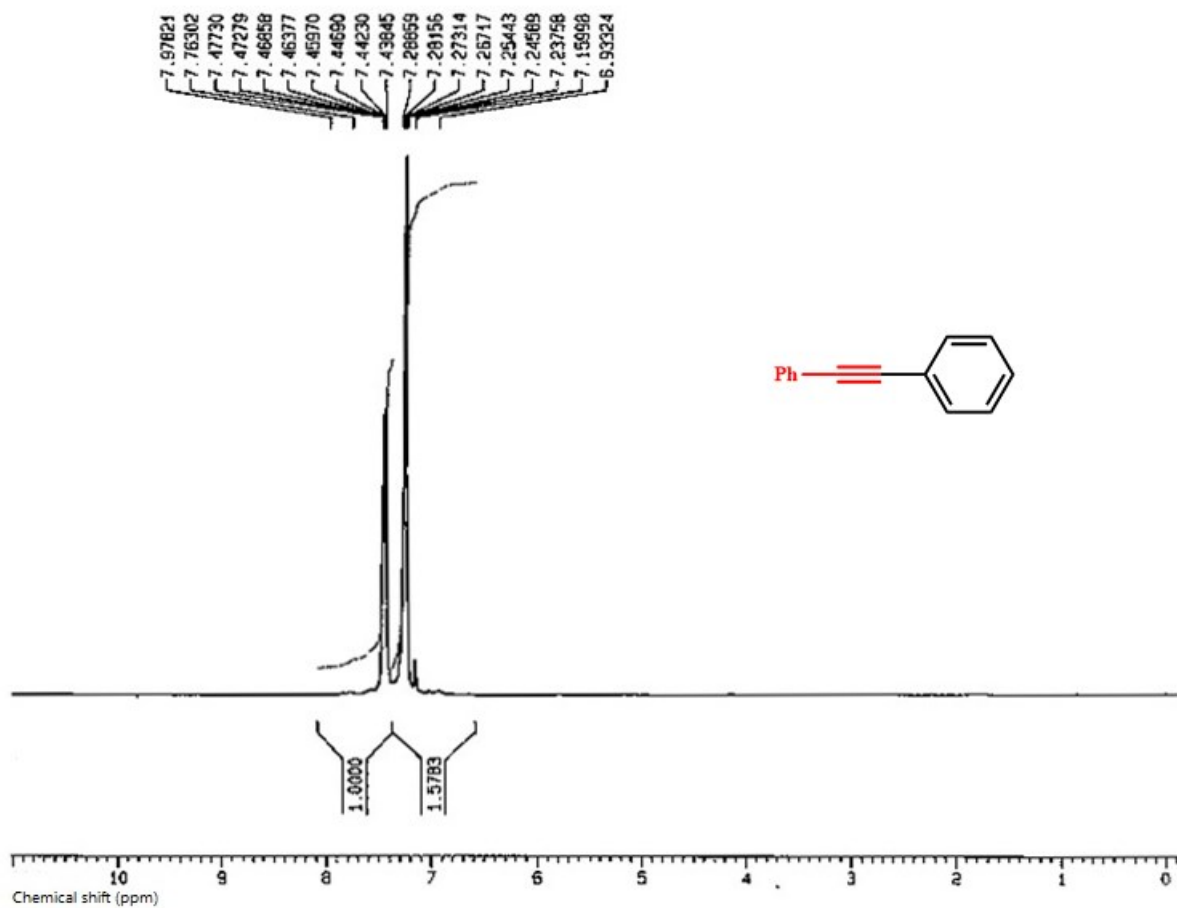

Figure S32. <sup>1</sup>H NMR spectrum of 11a

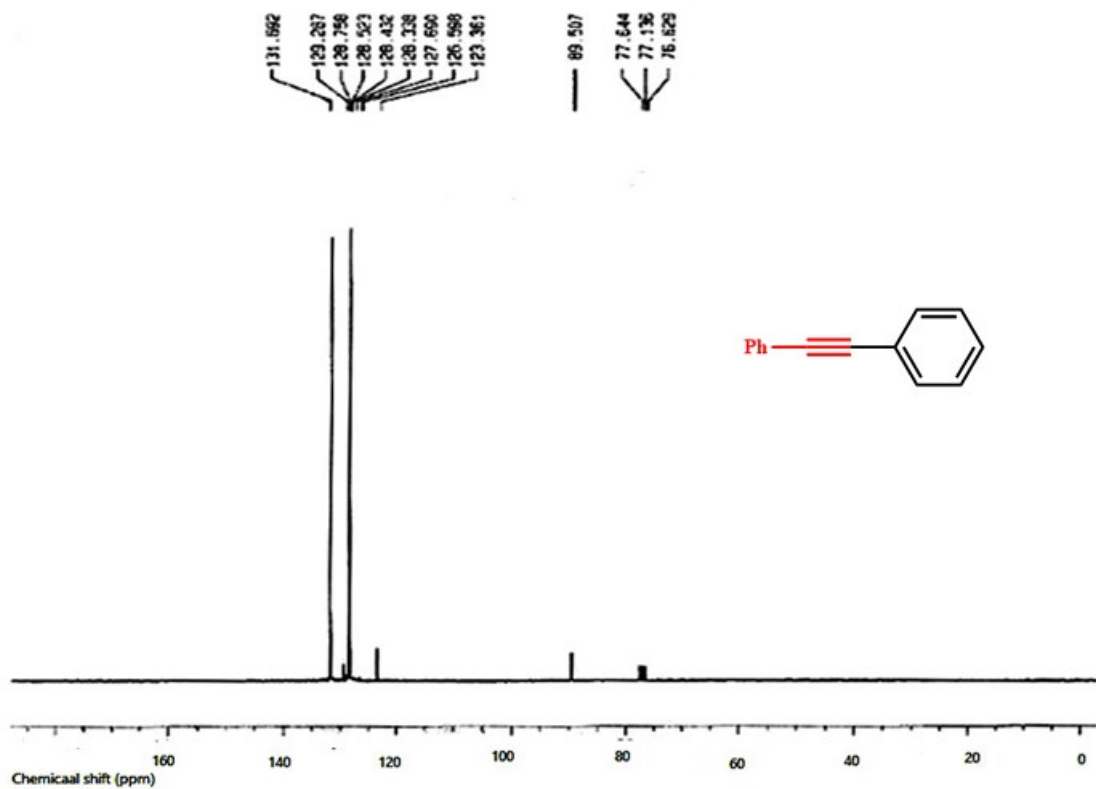

Figure S33. <sup>13</sup>C NMR spectrum of 11a

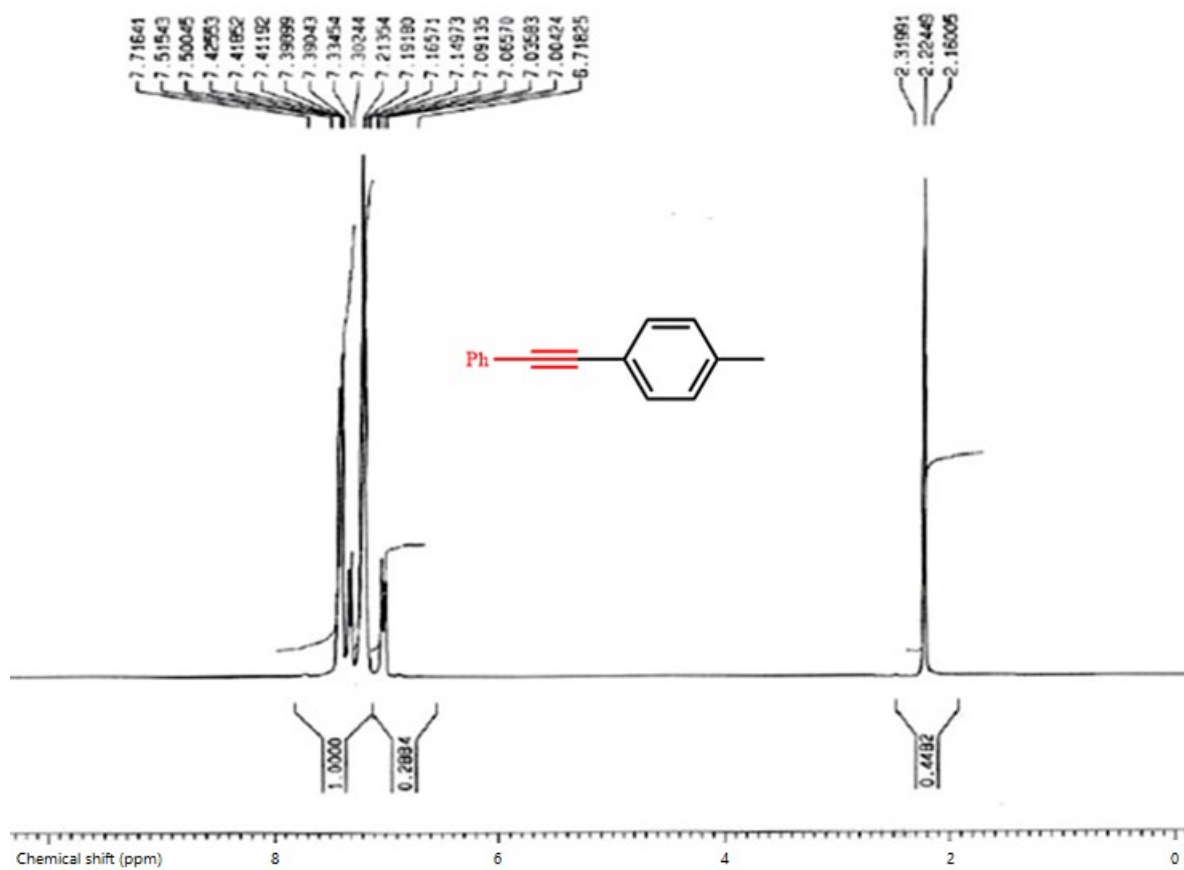

Figure S34. <sup>1</sup>H NMR spectrum of 11b

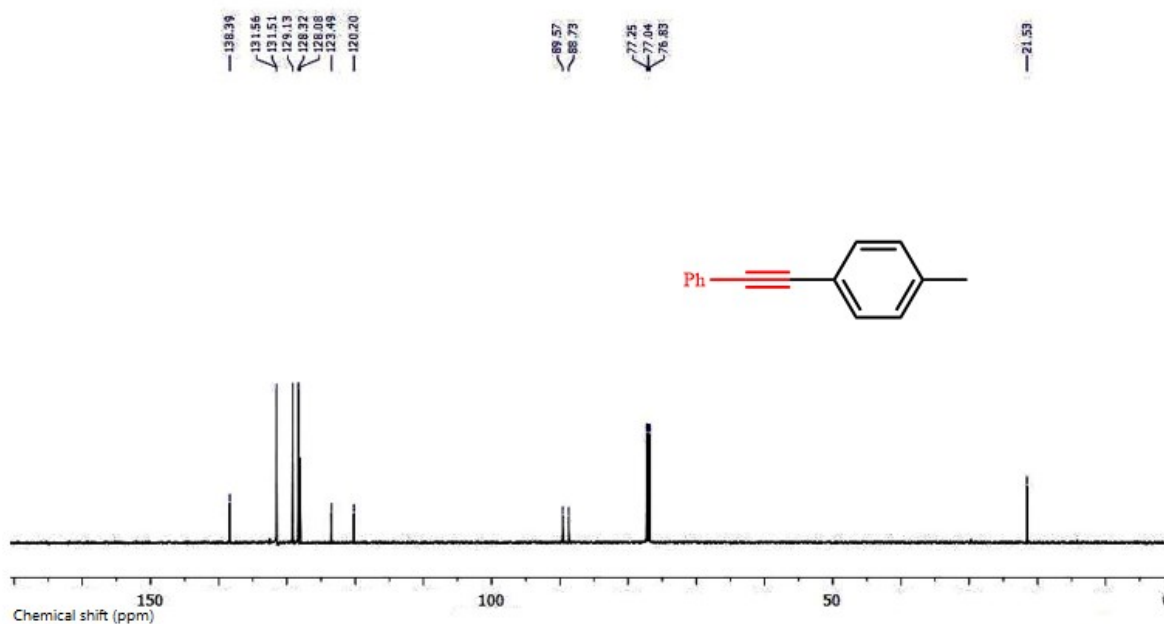

Figure S35. <sup>13</sup>C NMR spectrum of 11b

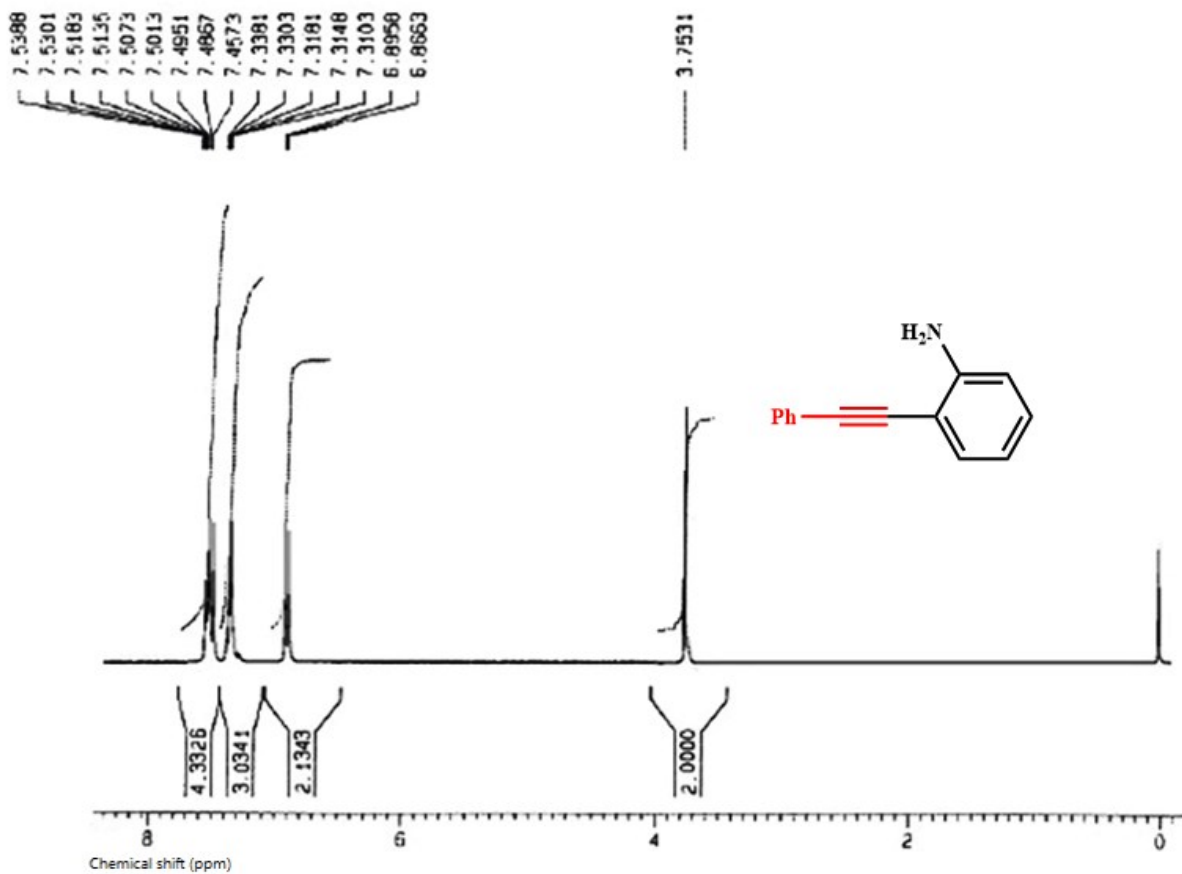

Figure S36.  $^1\text{H}$ NMR spectrum of **11c**

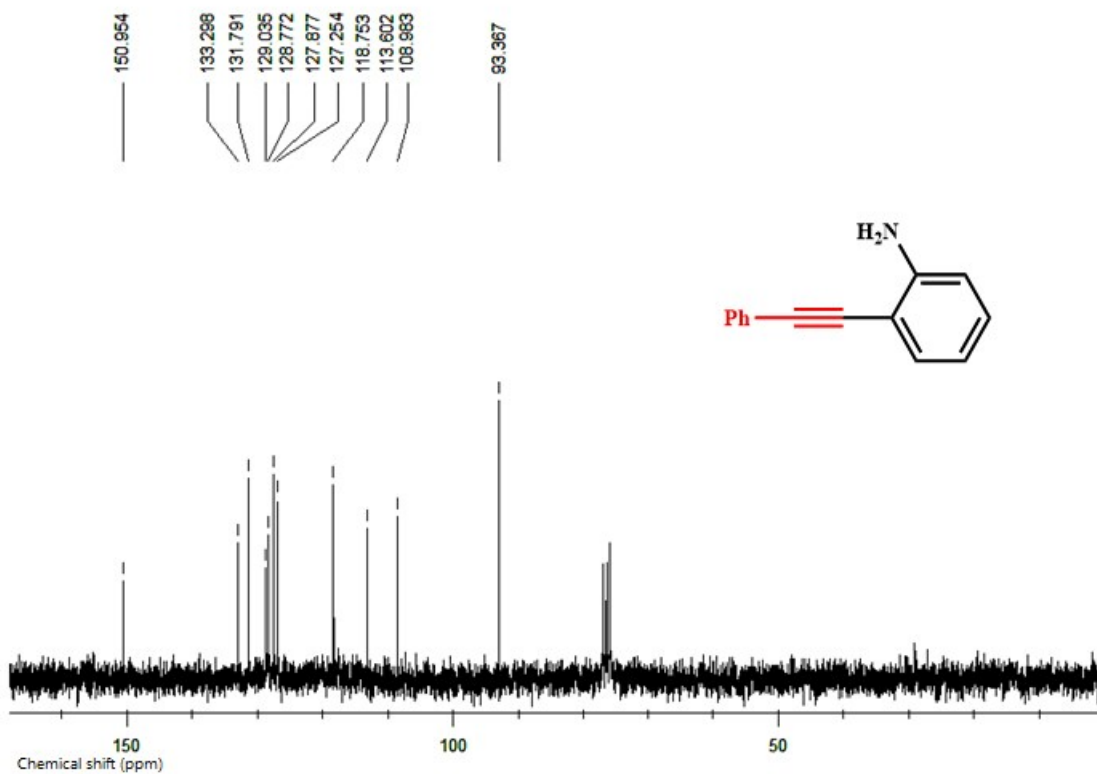

Figure S37.  $^{13}\text{C}$ NMR spectrum of **11c**

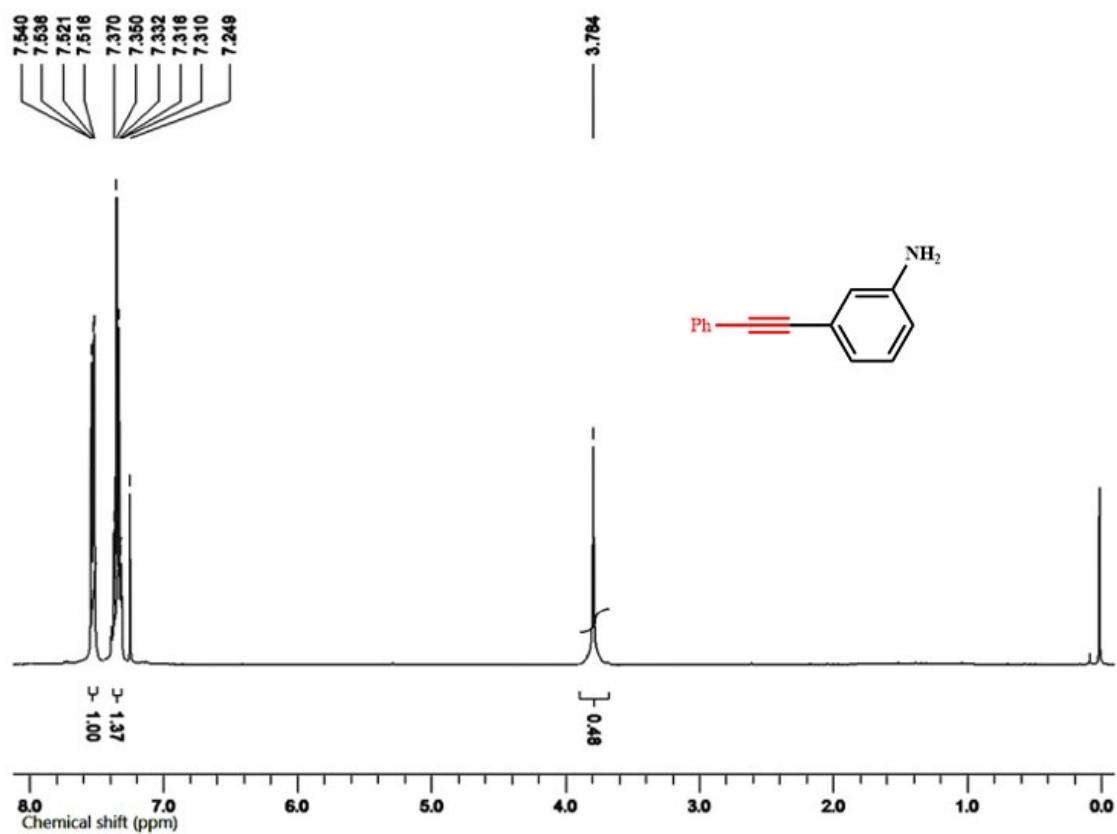

Figure S38. <sup>1</sup>H NMR spectrum of 11d

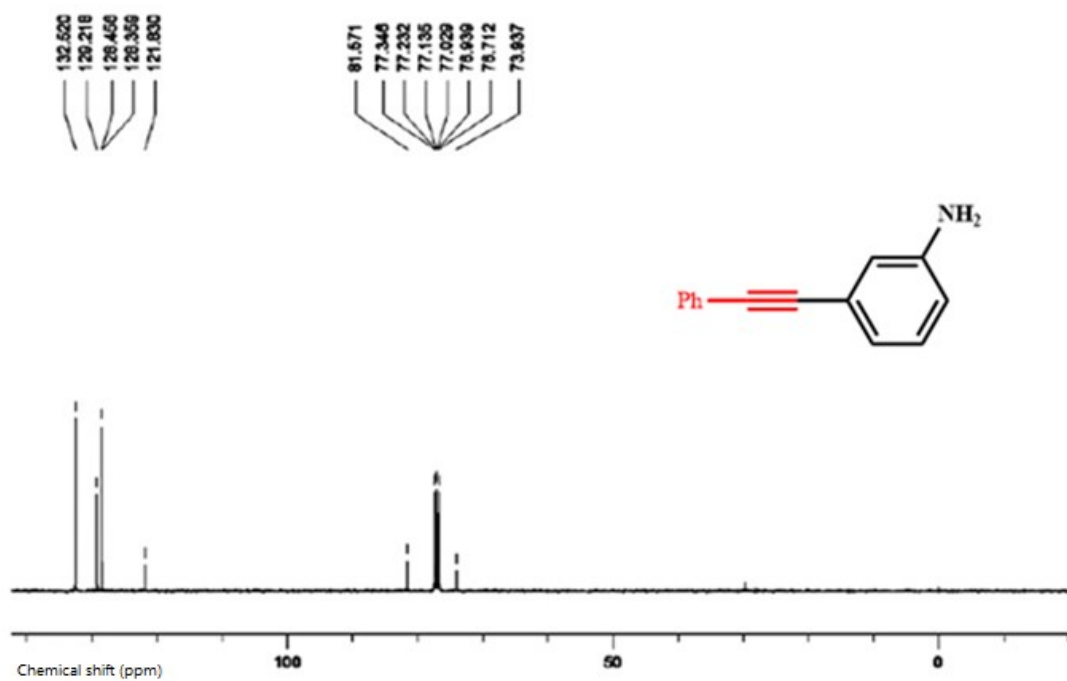

Figure S39. <sup>13</sup>C NMR spectrum of 11d

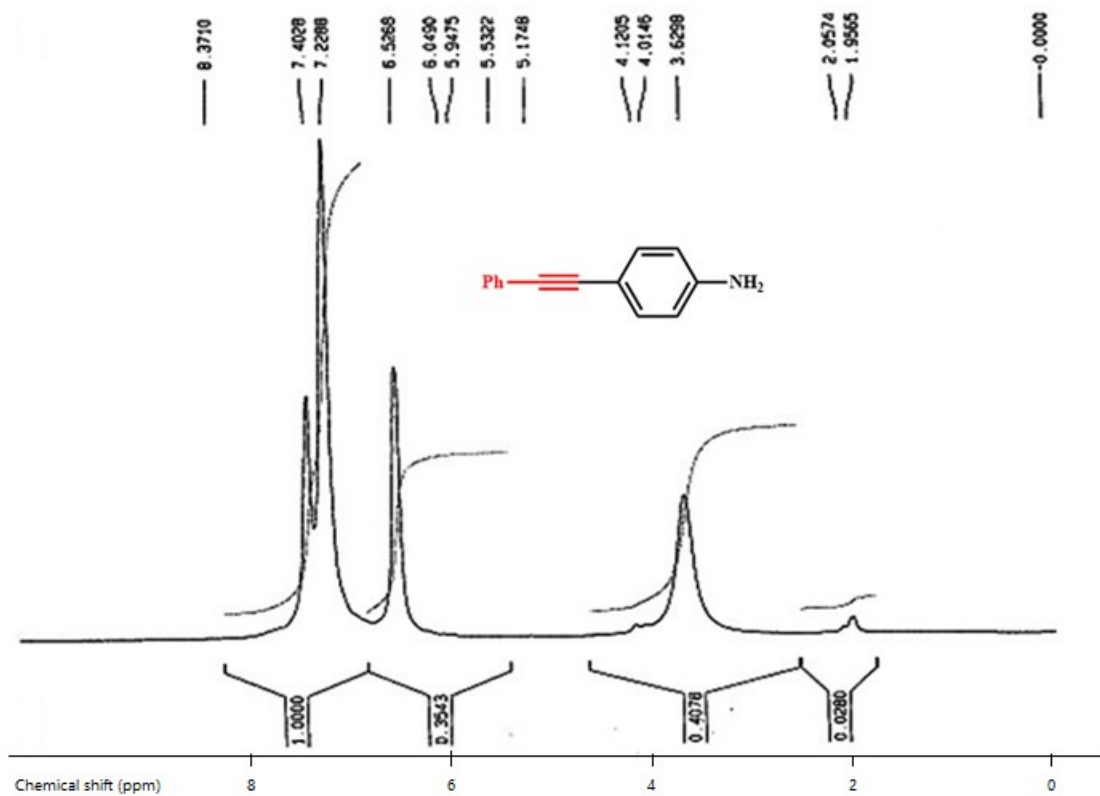

Figure S40. <sup>1</sup>H NMR spectrum of 11e

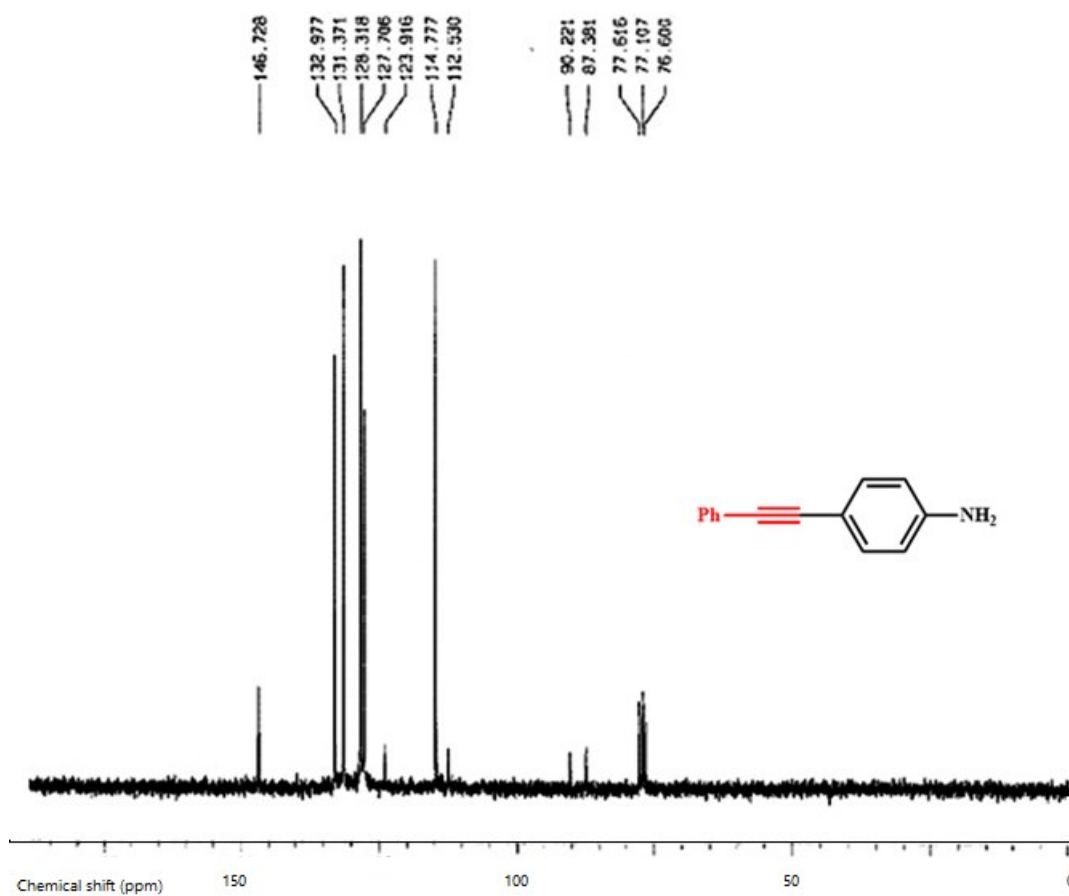

Figure S41. <sup>13</sup>C NMR spectrum of 11e

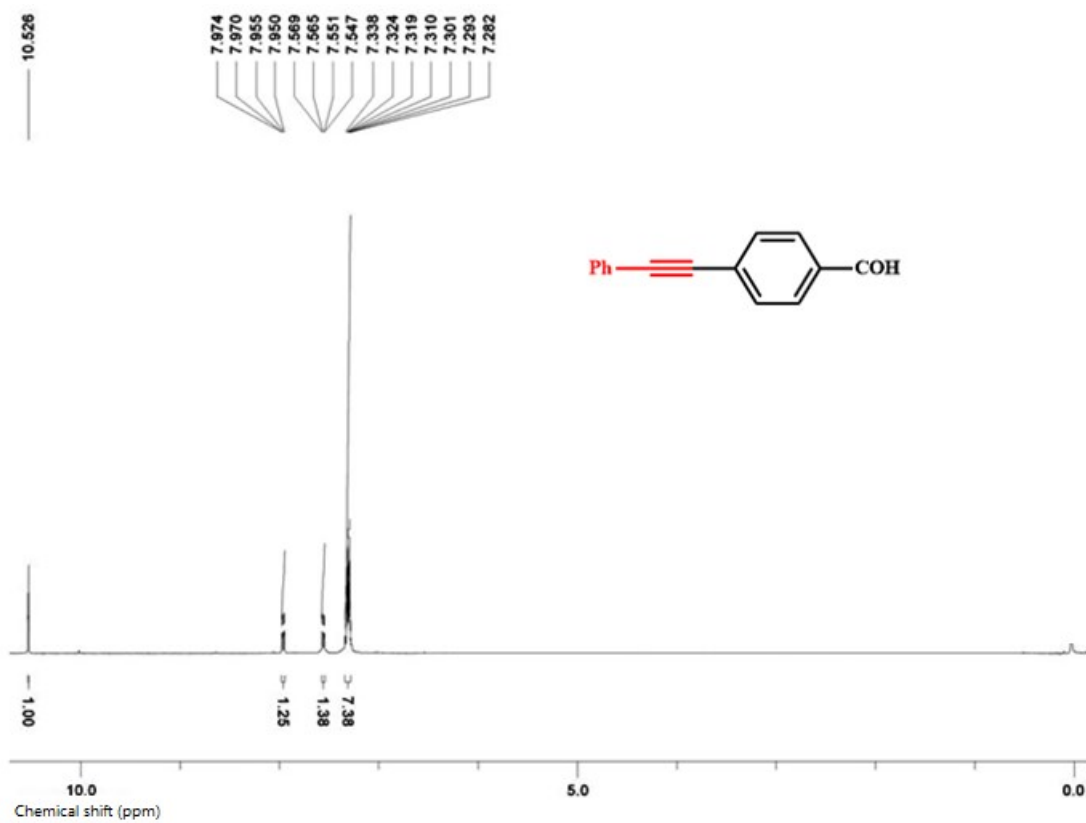

Figure S42. <sup>1</sup>H NMR spectrum of **11f**

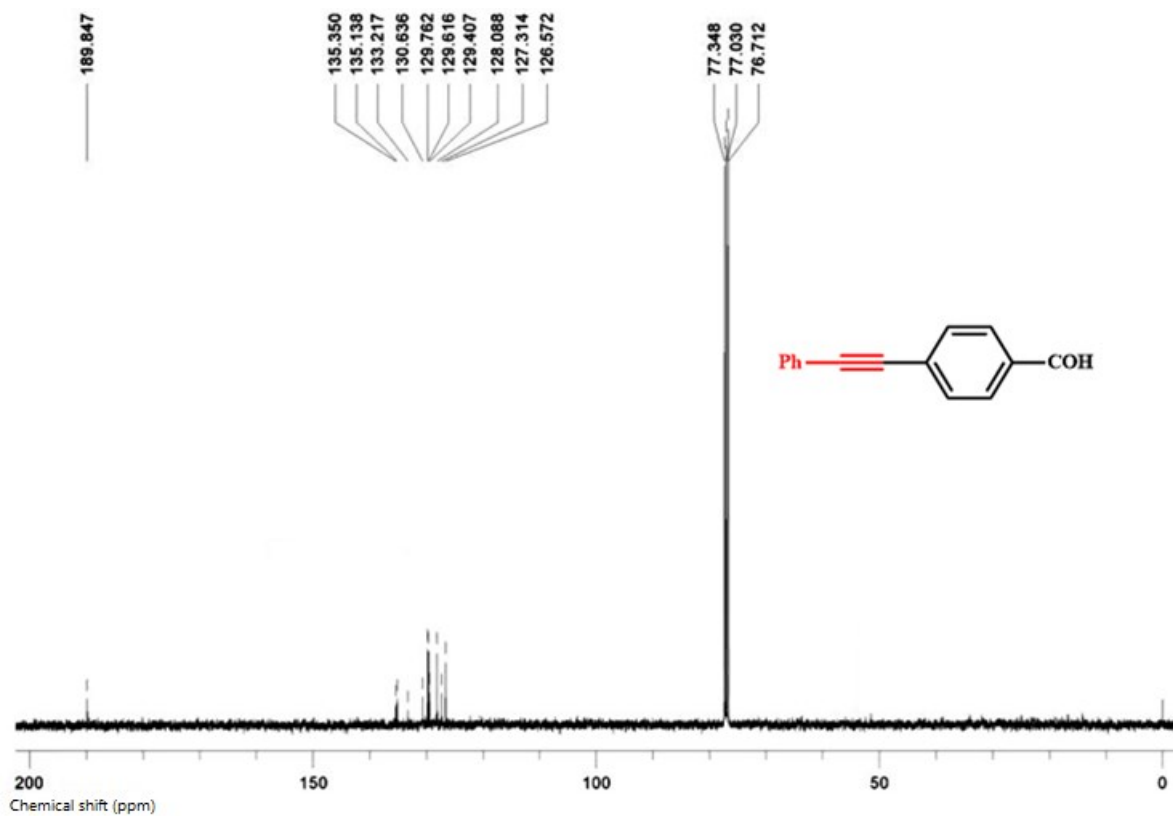

Figure S43. <sup>13</sup>C NMR spectrum of **11f**



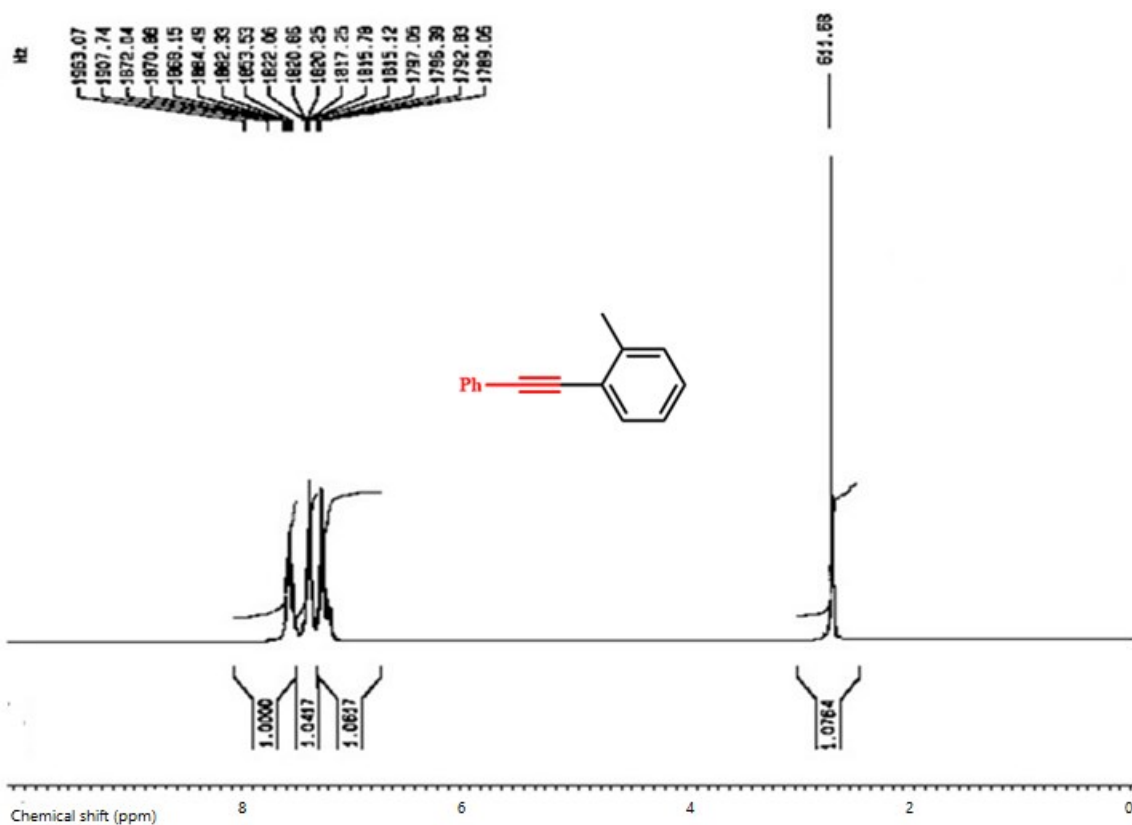

Figure S44. <sup>1</sup>H NMR spectrum of 11g

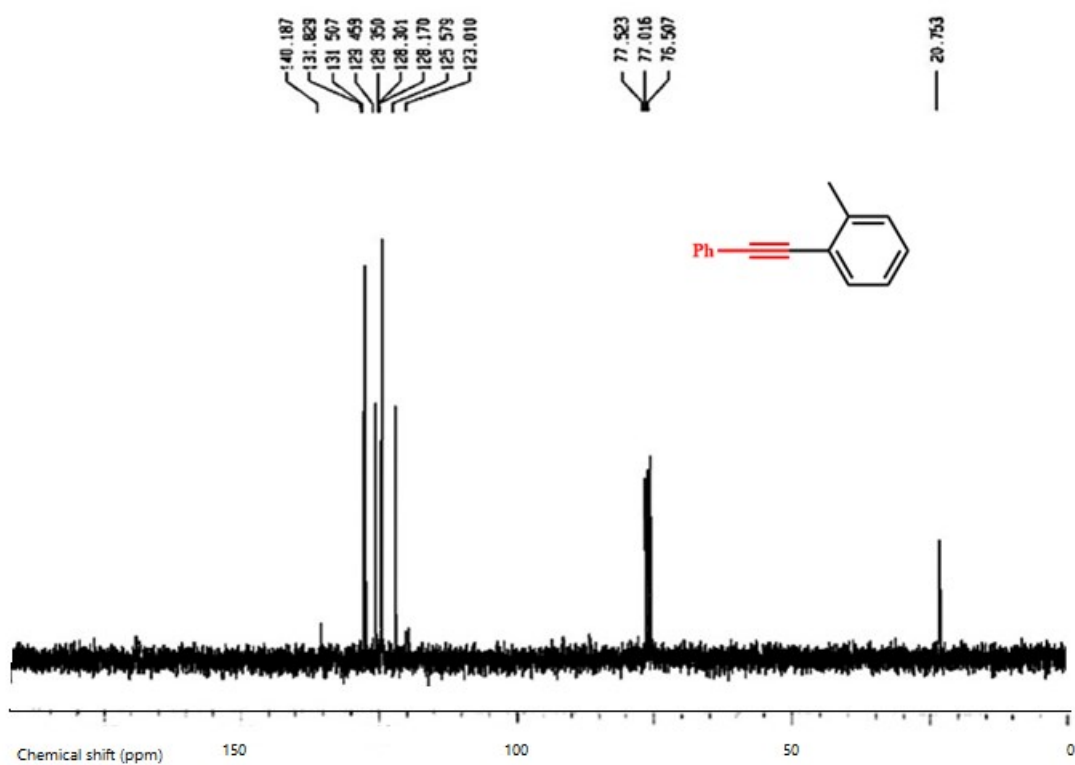

Figure S45. <sup>13</sup>C NMR spectrum of 11g

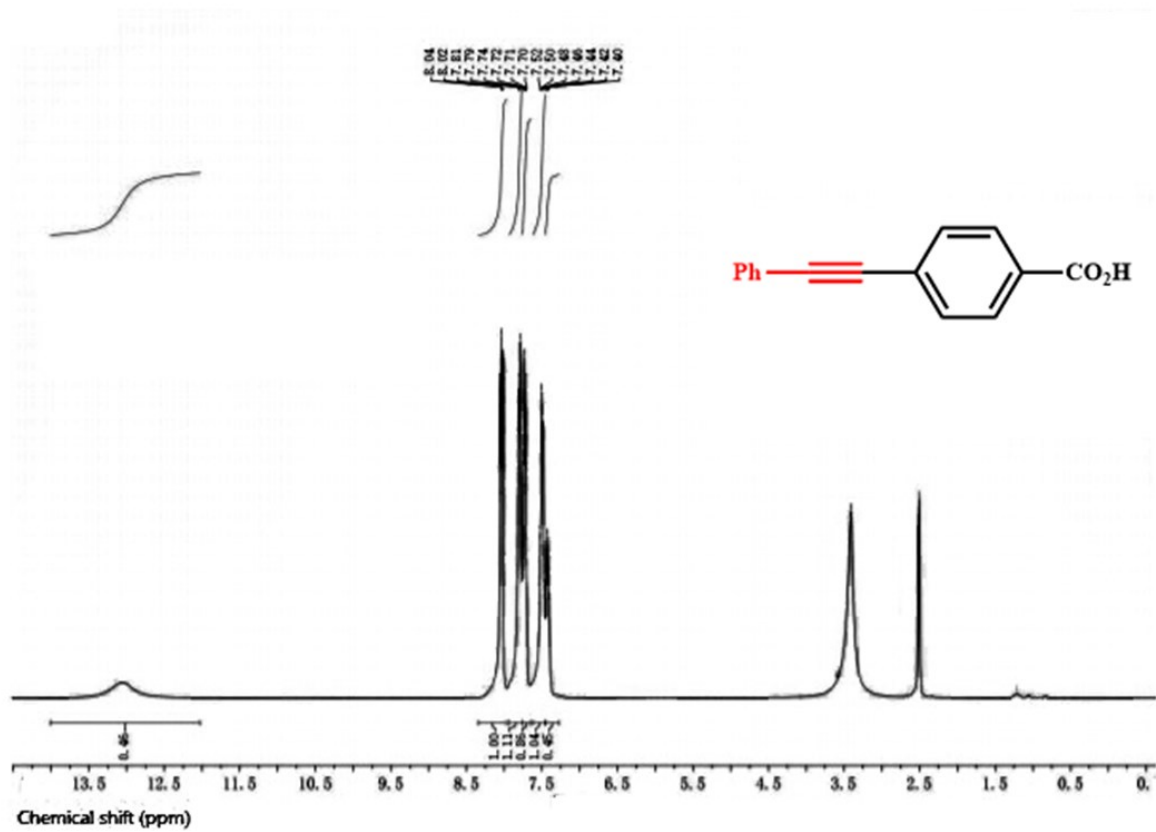

Figure S46. <sup>1</sup>H NMR spectrum of 11h

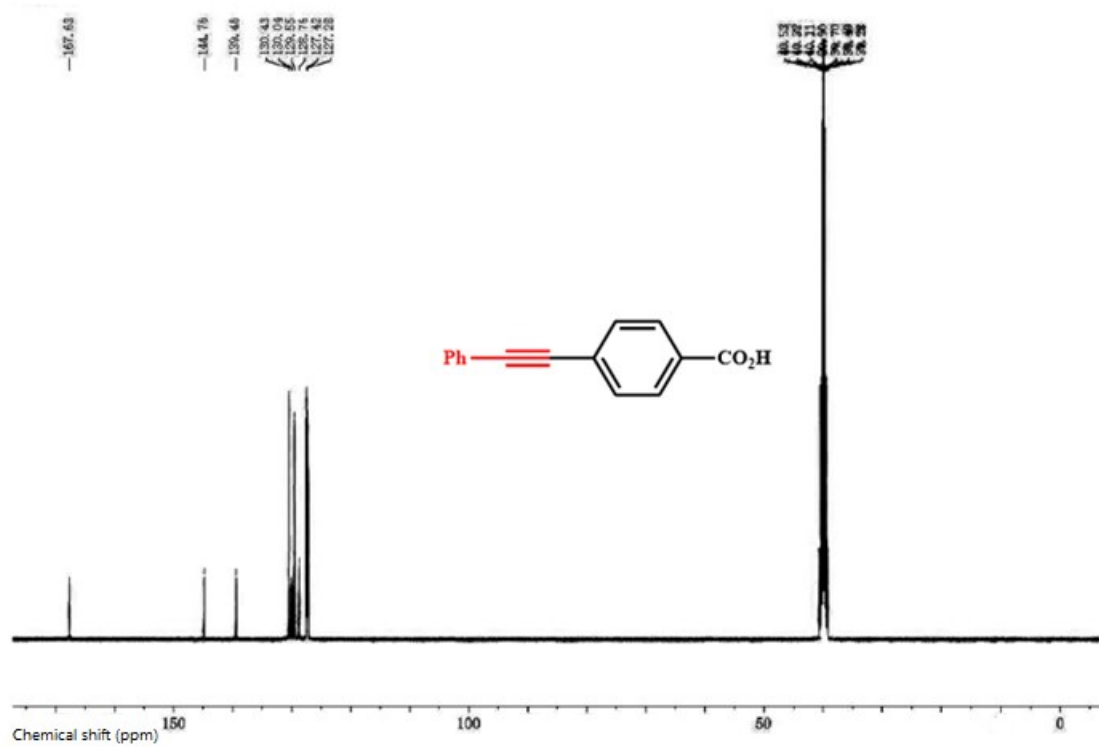

Figure S47. <sup>13</sup>C NMR spectrum of 11h

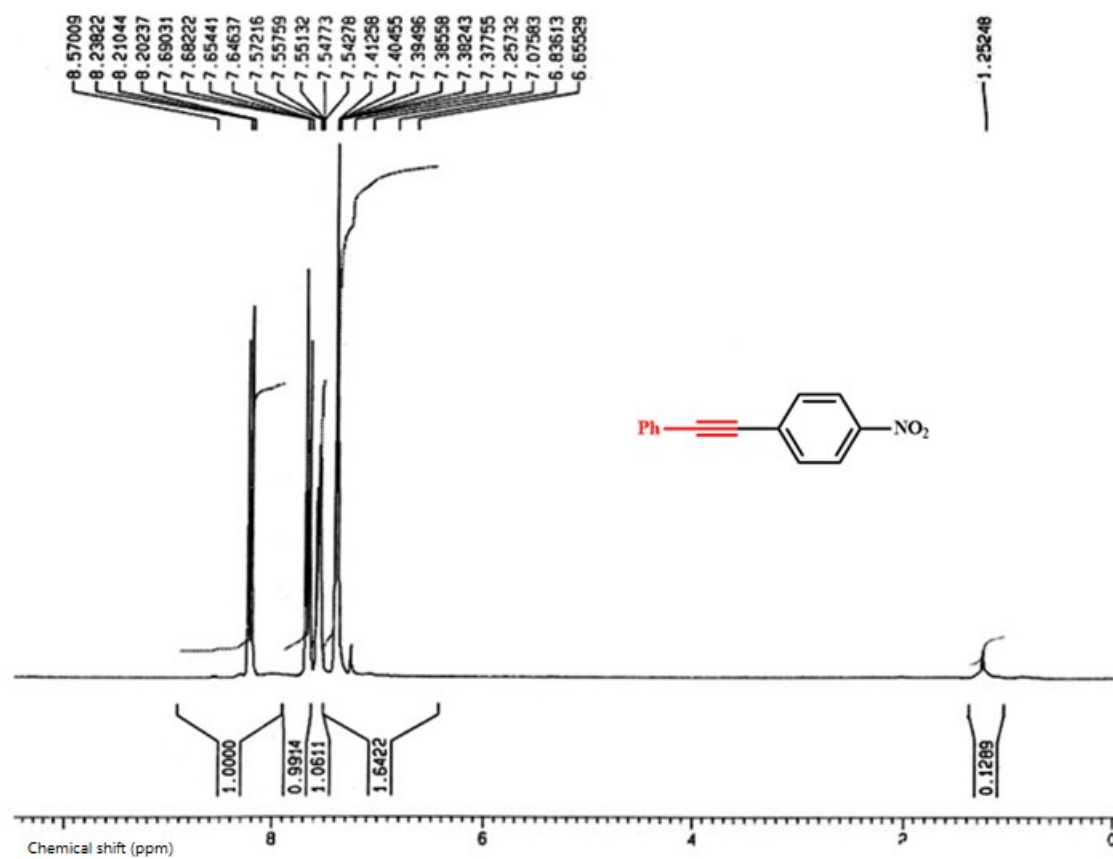

Figure S48. <sup>1</sup>H NMR spectrum of 11i

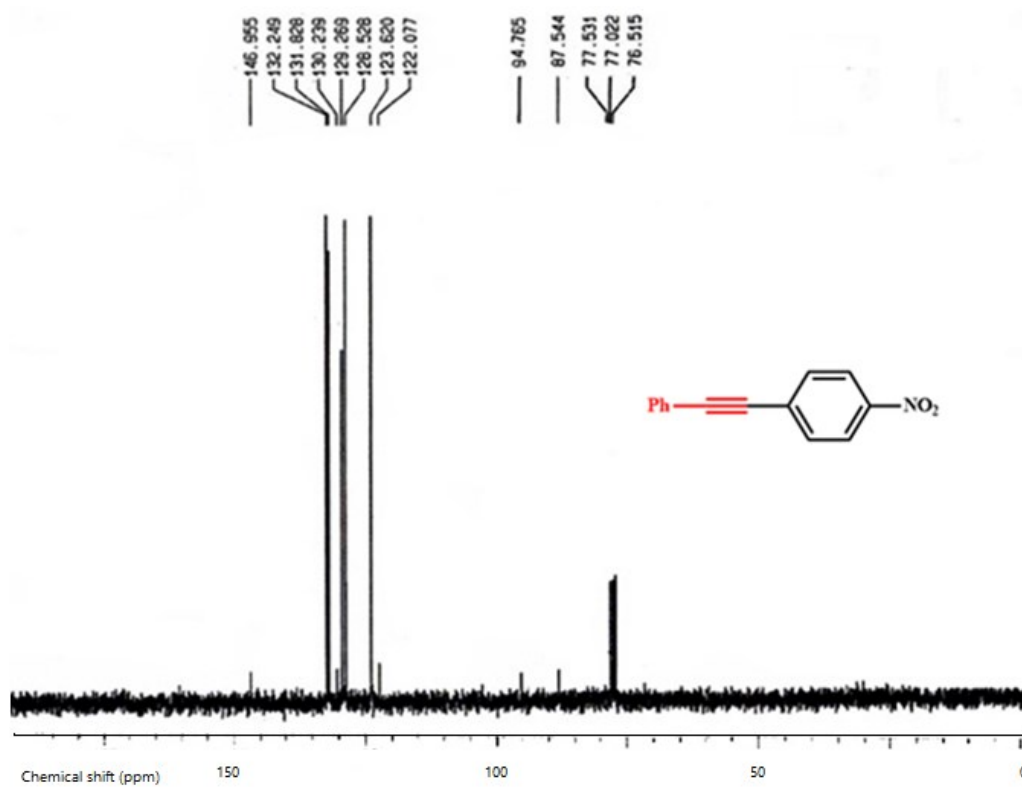

Figure S49. <sup>13</sup>C NMR spectrum of 11i

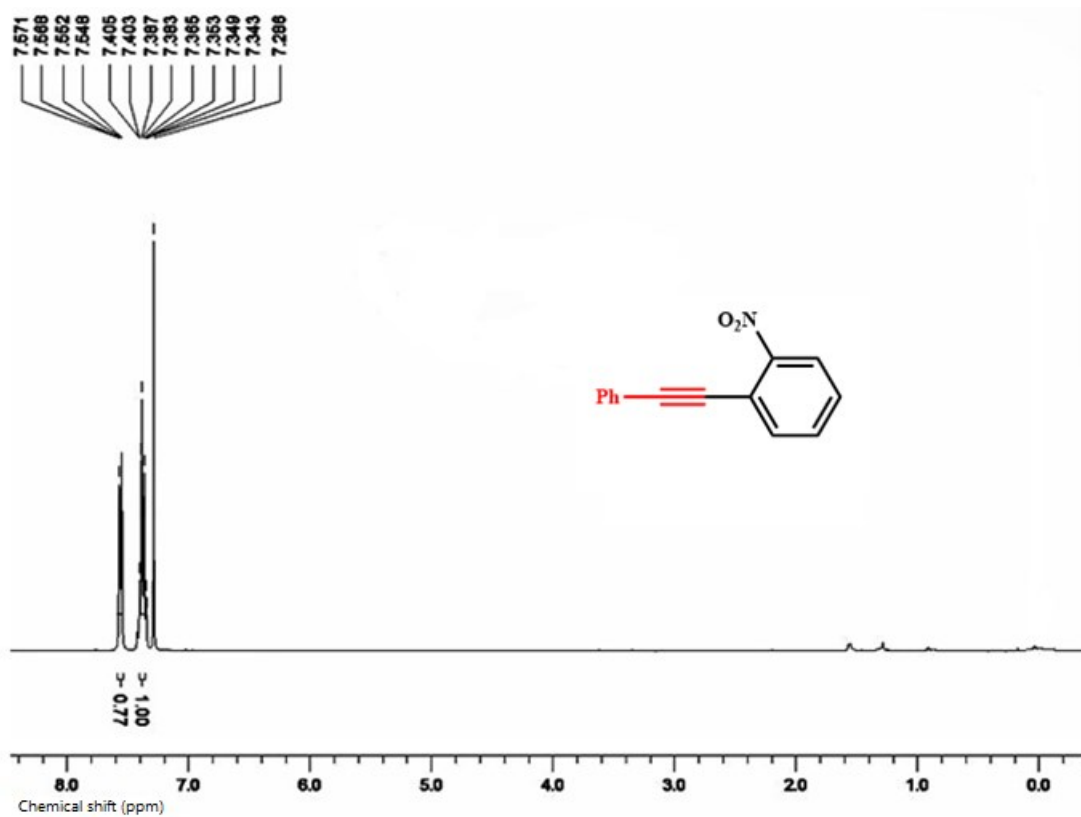

Figure S50. <sup>1</sup>H NMR spectrum of 11j

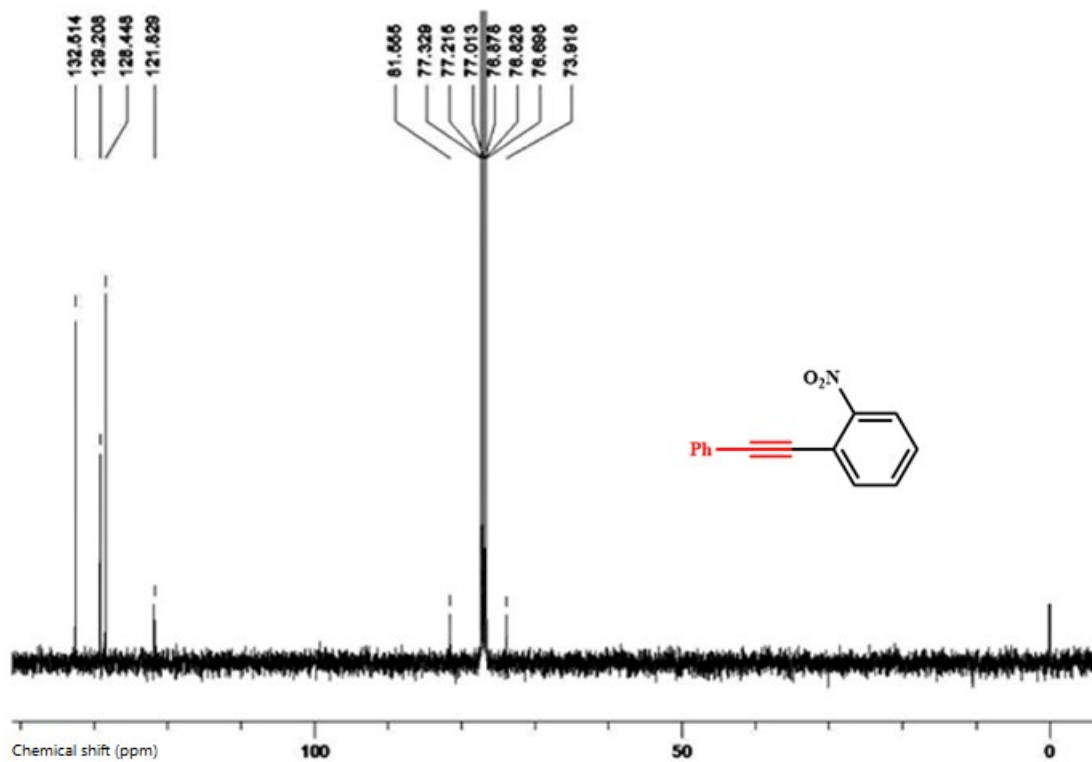

Figure S51. <sup>13</sup>C NMR spectrum of 11j

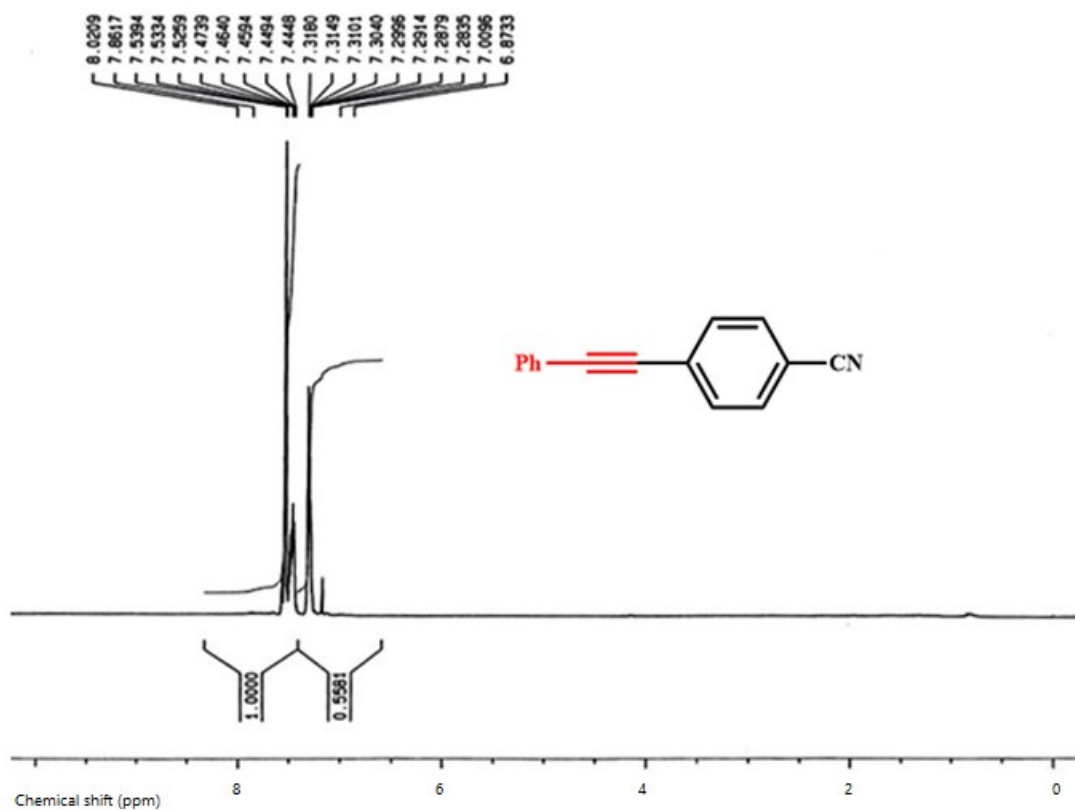

Figure S52. <sup>1</sup>H NMR spectrum of 11k

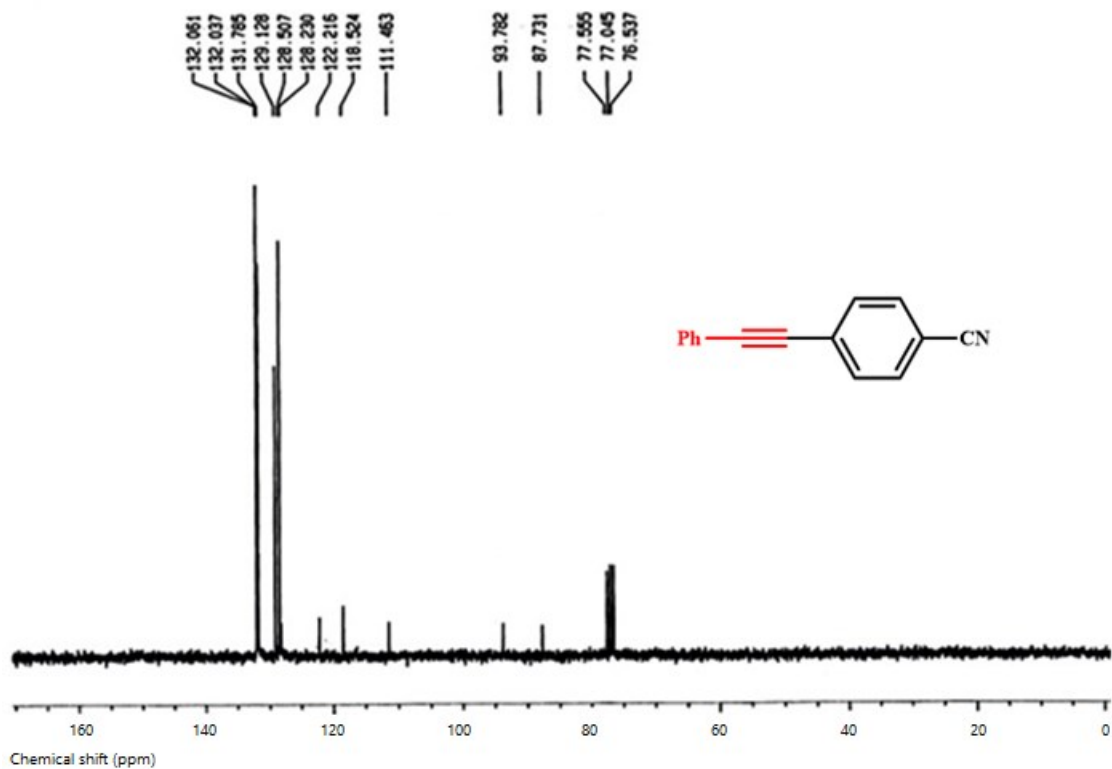

Figure S53. <sup>13</sup>C NMR spectrum of 11k

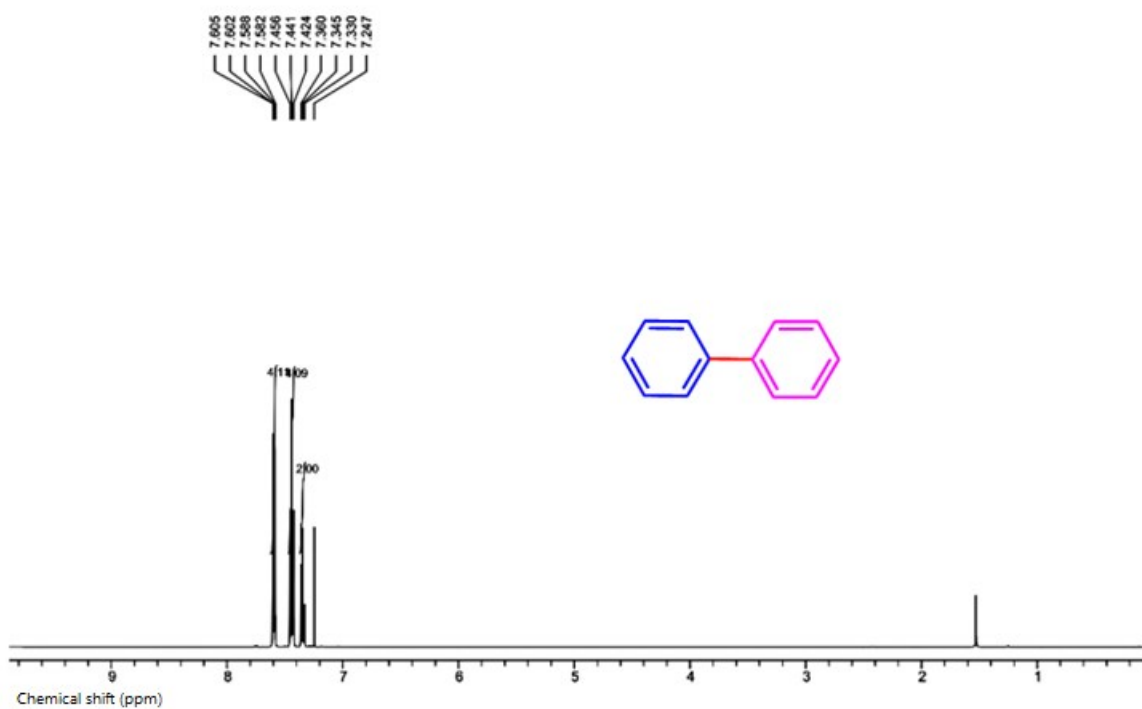

Figure S54.  $^1\text{H}$ NMR spectrum of **12a**

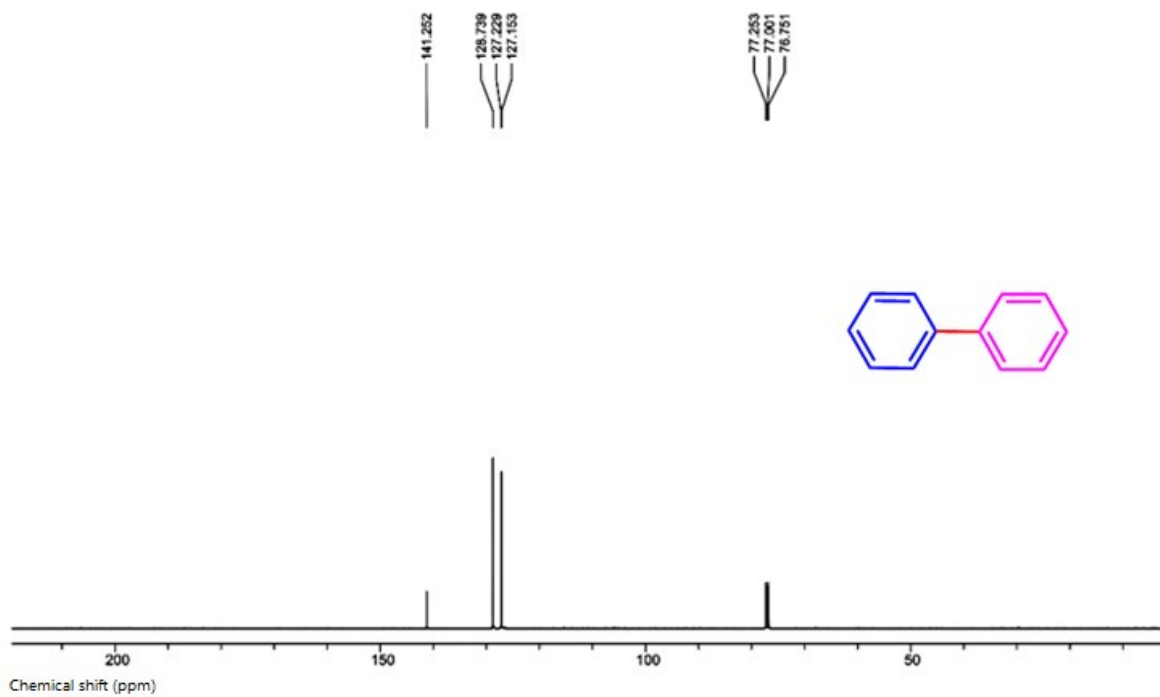

Figure S55.  $^{13}\text{C}$ NMR spectrum of **12a**

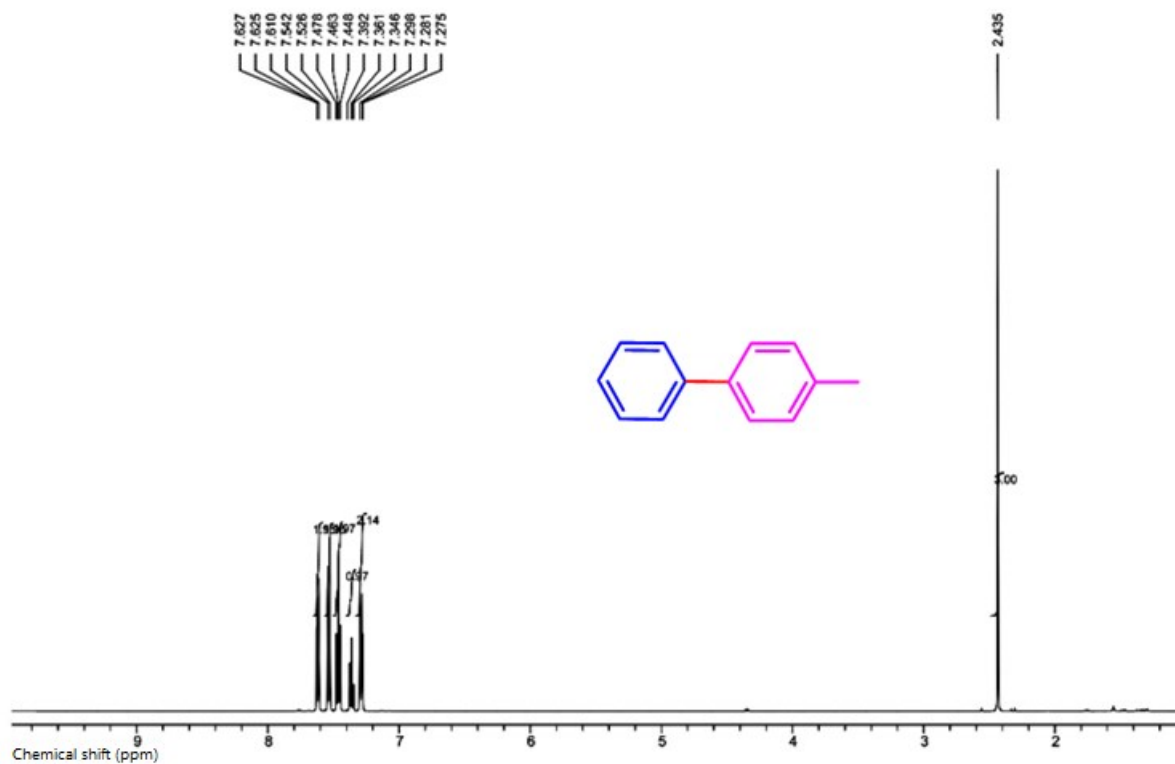

Figure S56. <sup>1</sup>H NMR spectrum of 12b

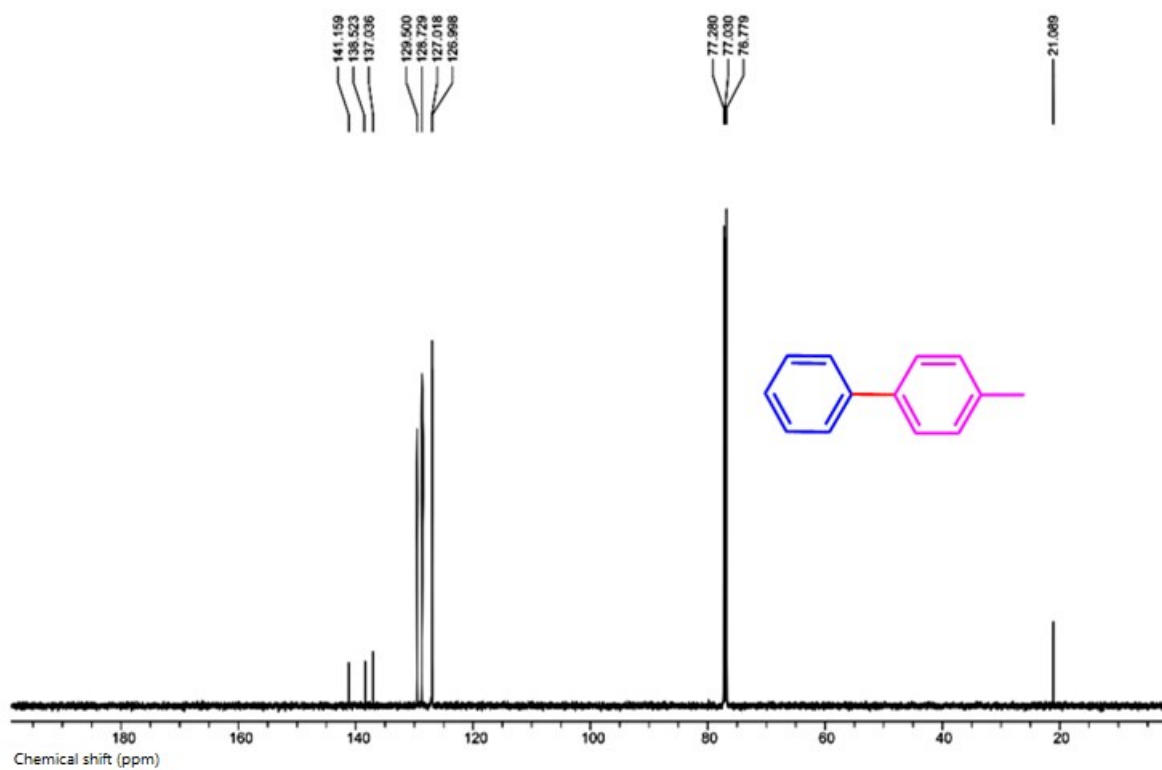

Figure S57. <sup>13</sup>C NMR spectrum of 12b

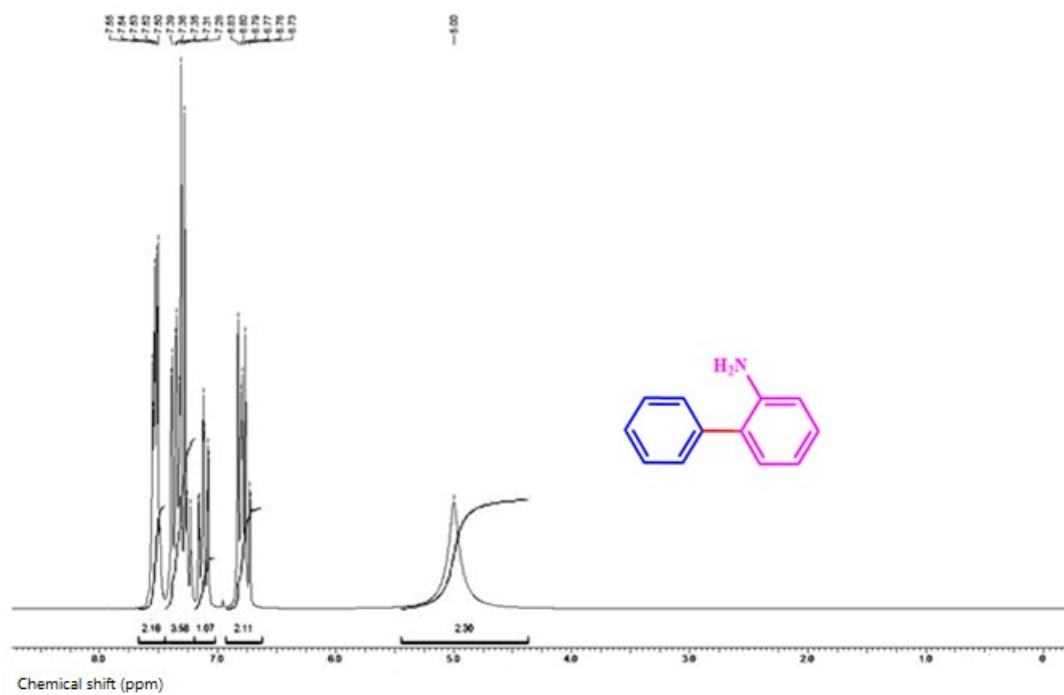

Figure S58.  $^1\text{H}$ NMR spectrum of **12c**

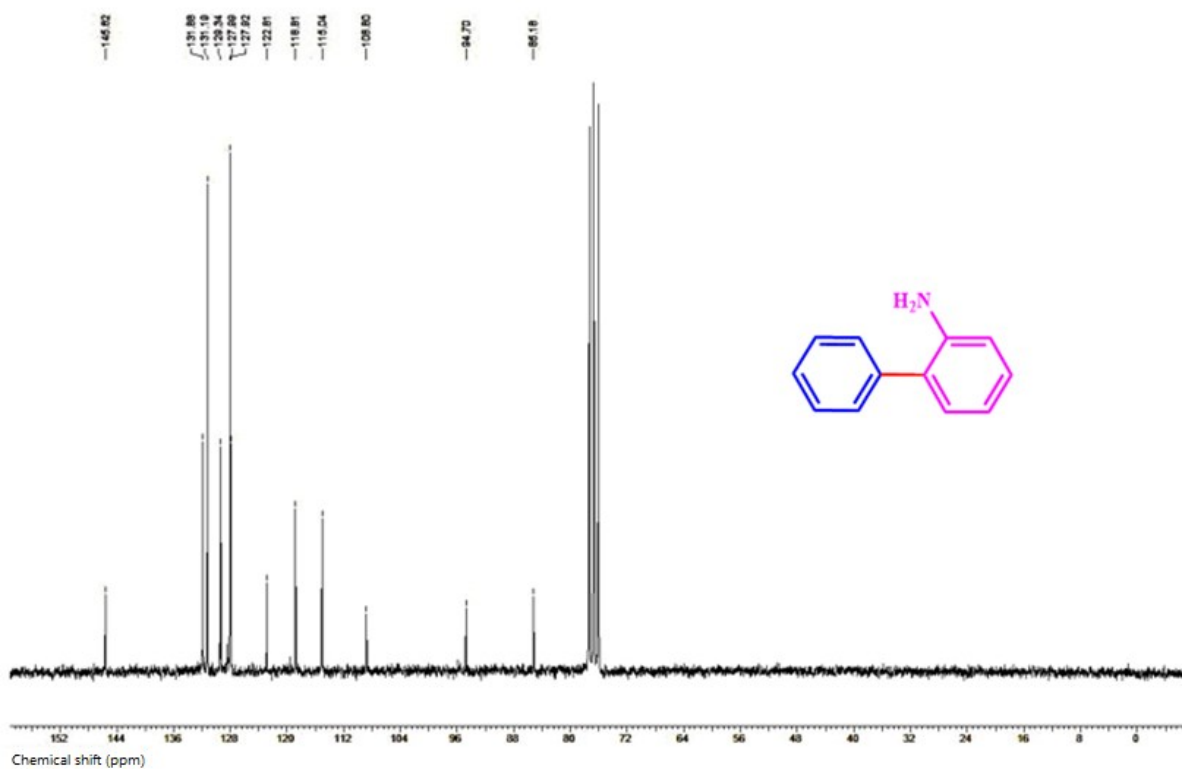

Figure S59.  $^{13}\text{C}$ NMR spectrum of **12c**



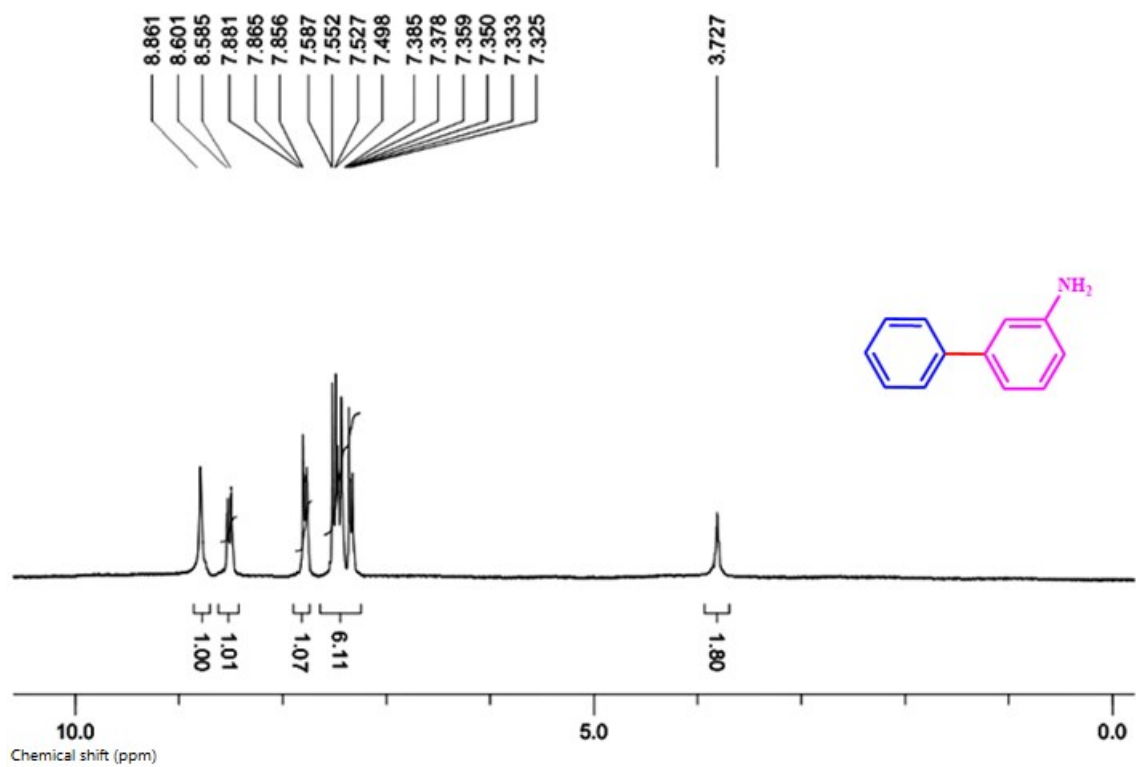

Figure S60.  $^1\text{H}$ NMR spectrum of 12d

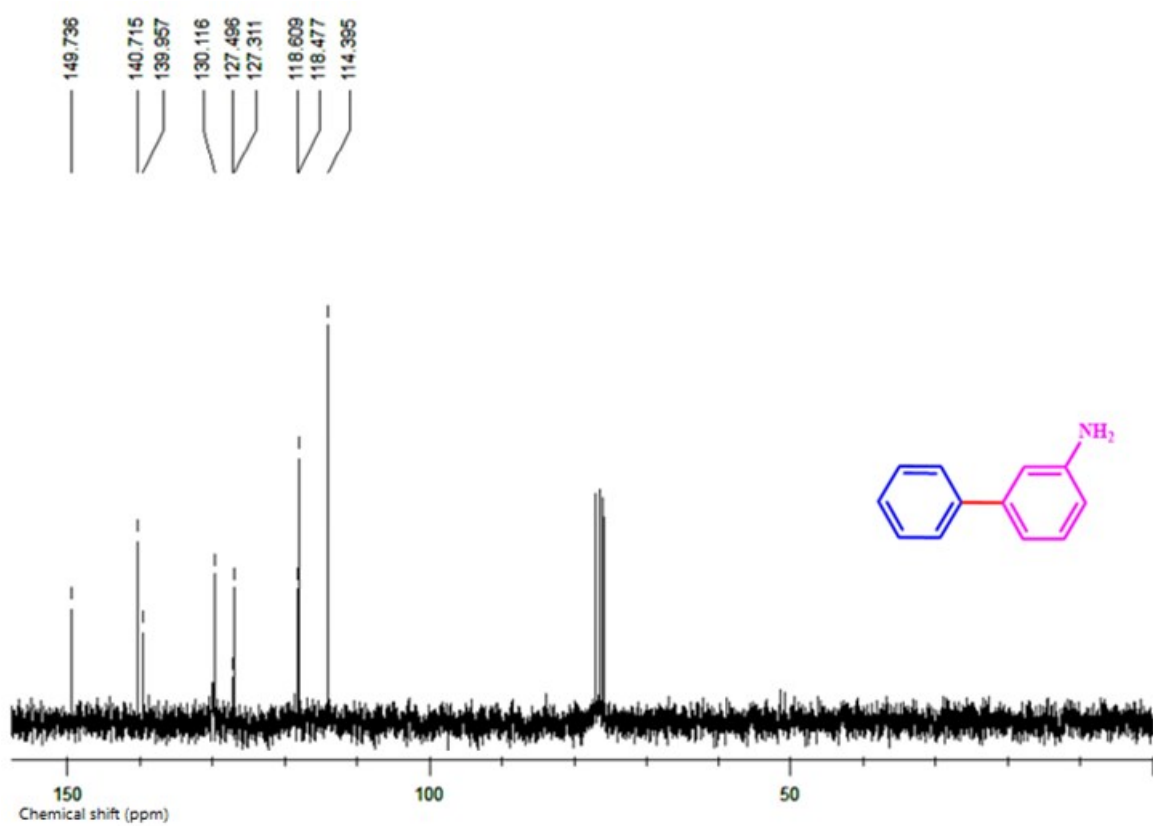

Figure S61.  $^{13}\text{C}$ NMR spectrum of 12d

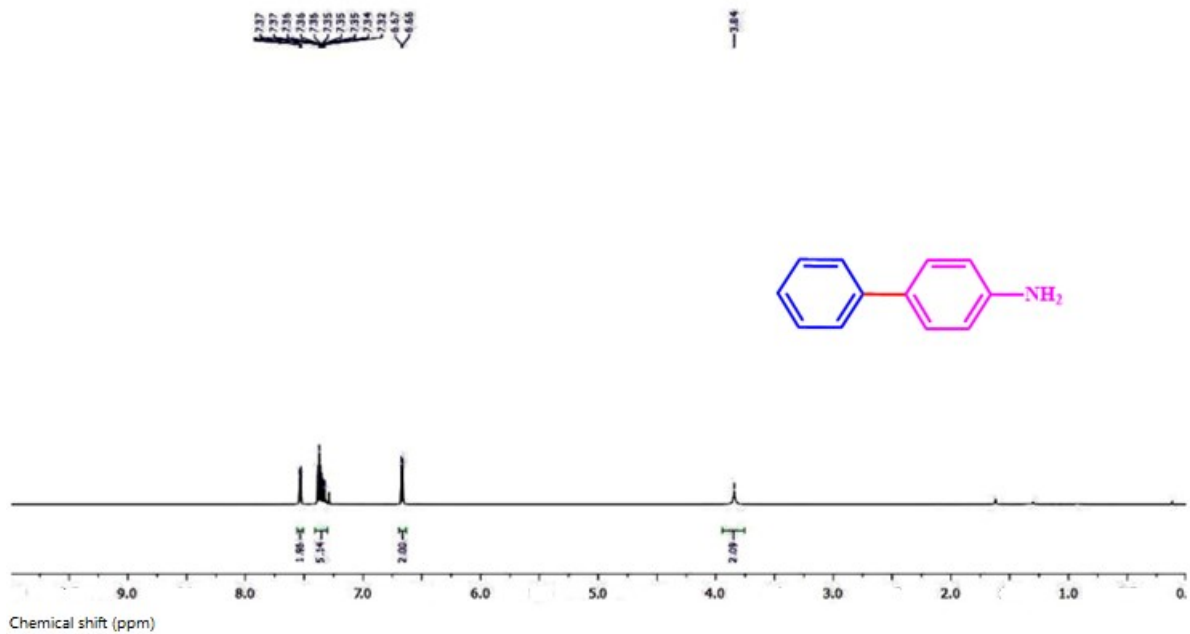

Figure S62. <sup>1</sup>H NMR spectrum of 12e

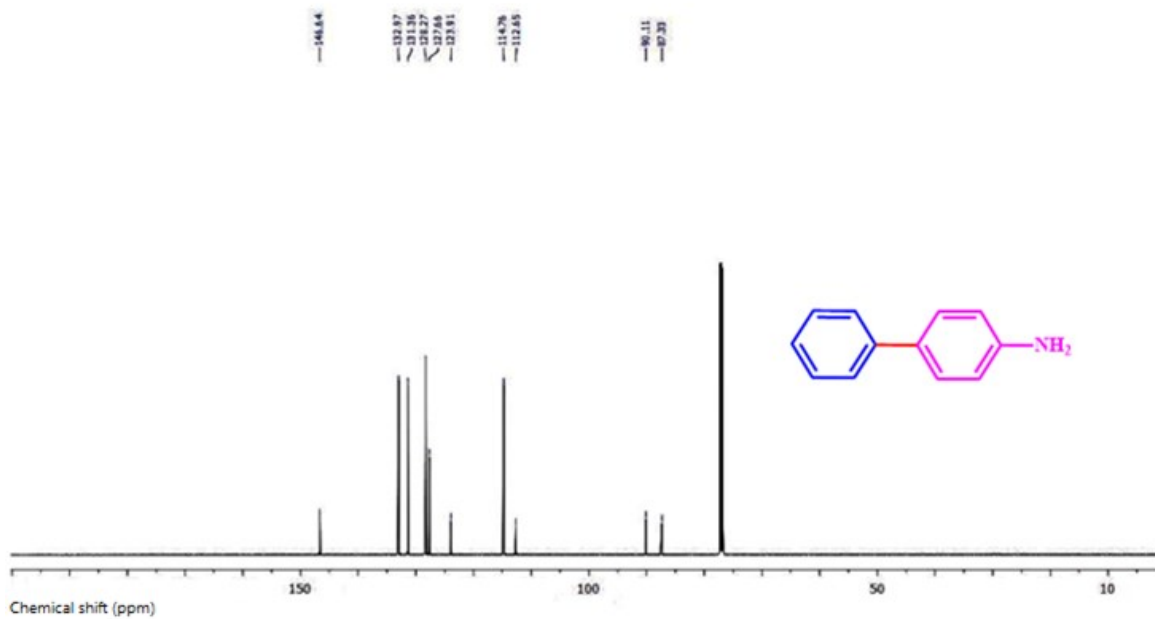

Figure S63. <sup>13</sup>C NMR spectrum of 12e

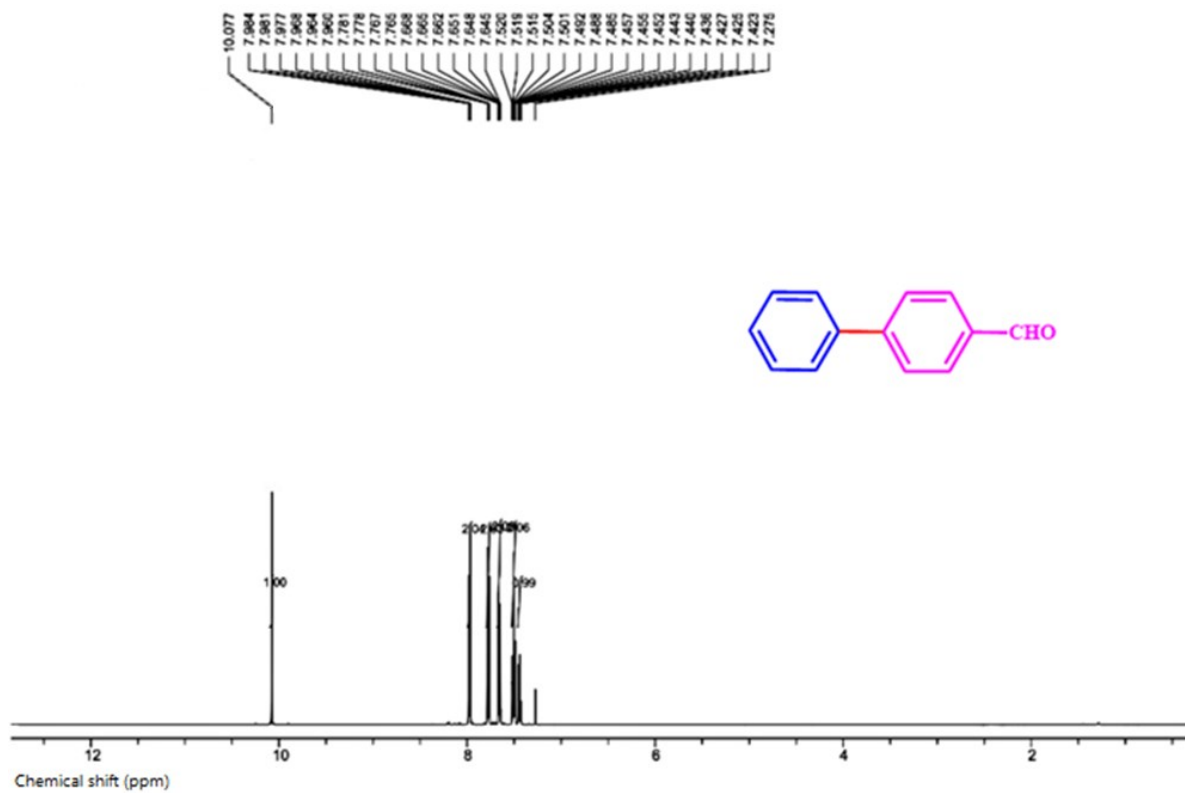

Figure S64. <sup>1</sup>H NMR spectrum of **12f**

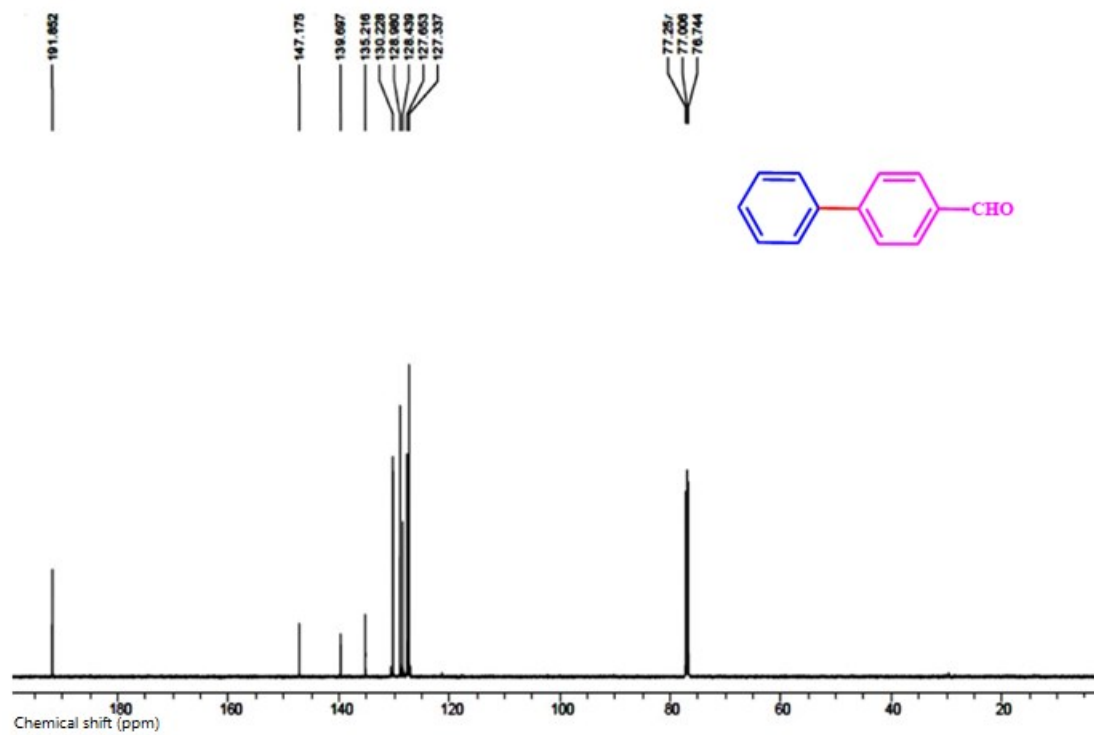

Figure S65. <sup>13</sup>C NMR spectrum of **12f**

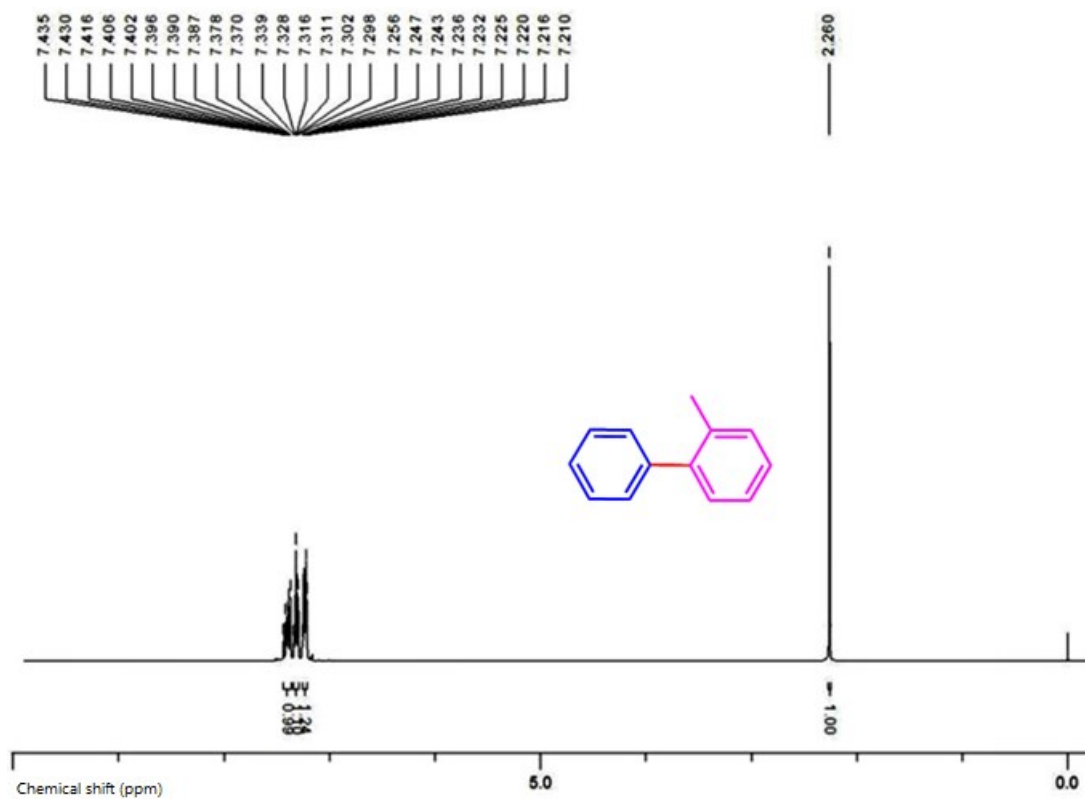

Figure S66. <sup>1</sup>H NMR spectrum of 12g

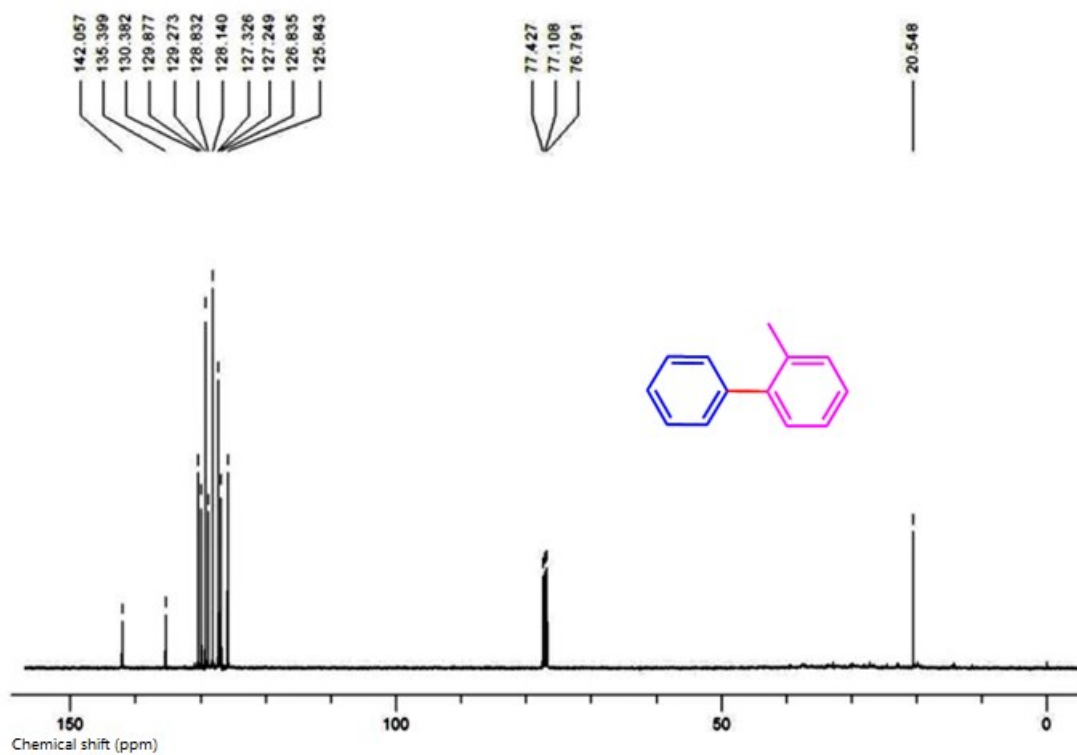

Figure S67. <sup>13</sup>C NMR spectrum of 12g

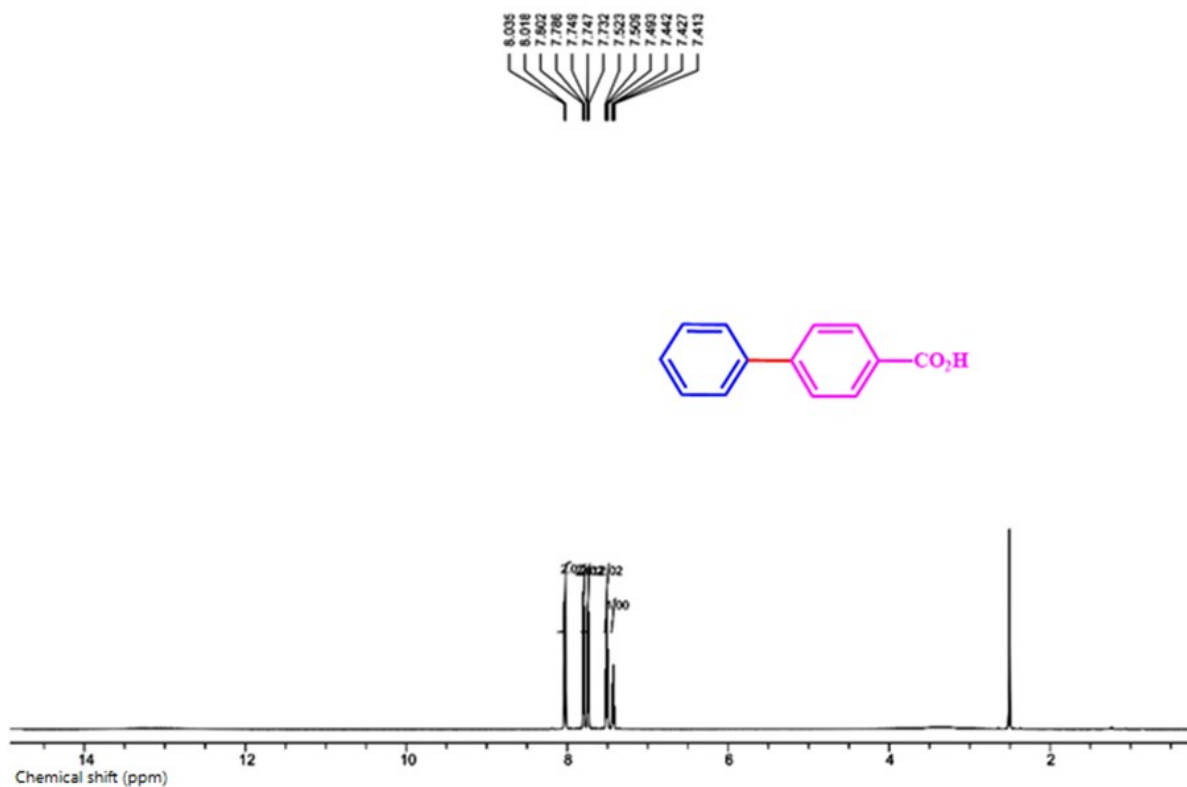

Figure S68. <sup>1</sup>H NMR spectrum of 12h

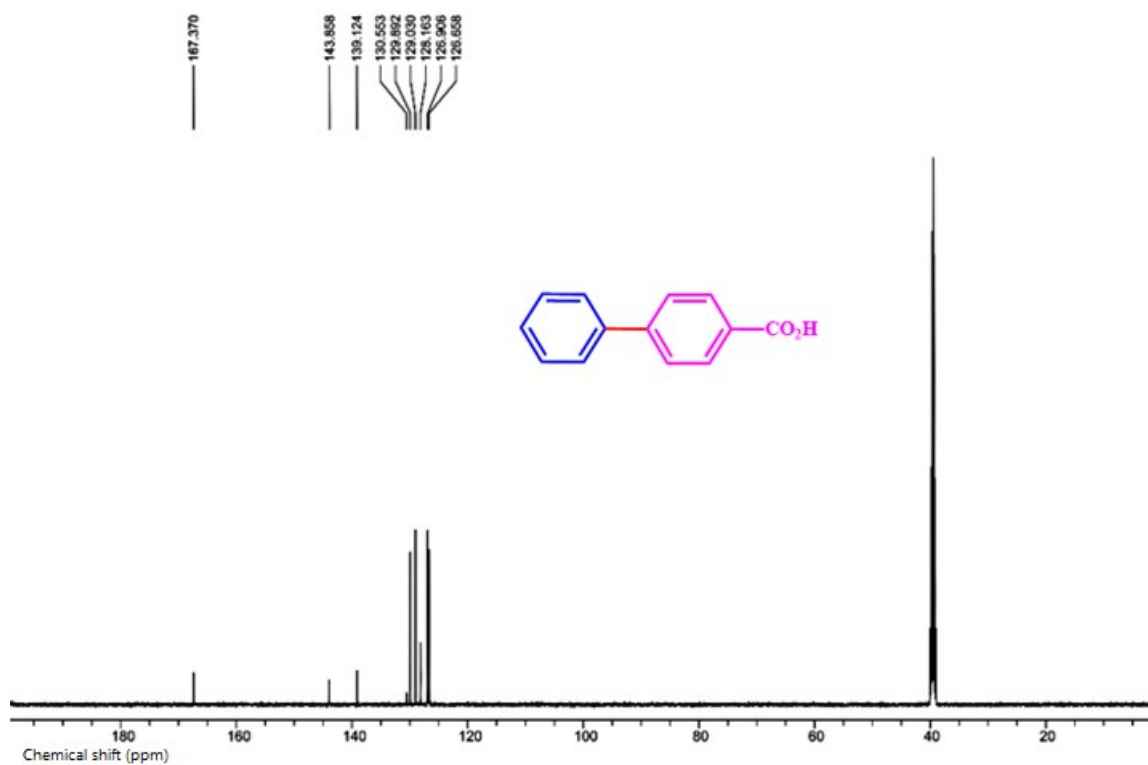

Figure S69. <sup>13</sup>C NMR spectrum of 12h

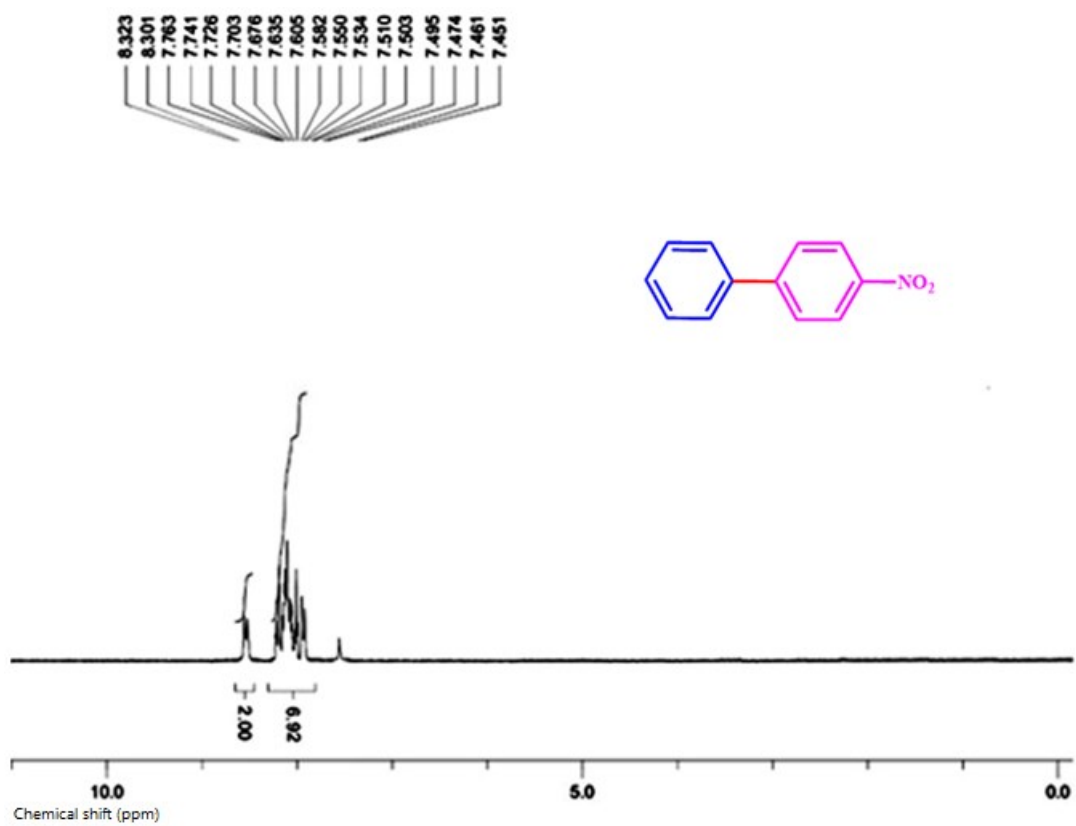

Figure S70. <sup>1</sup>H NMR spectrum of 12i

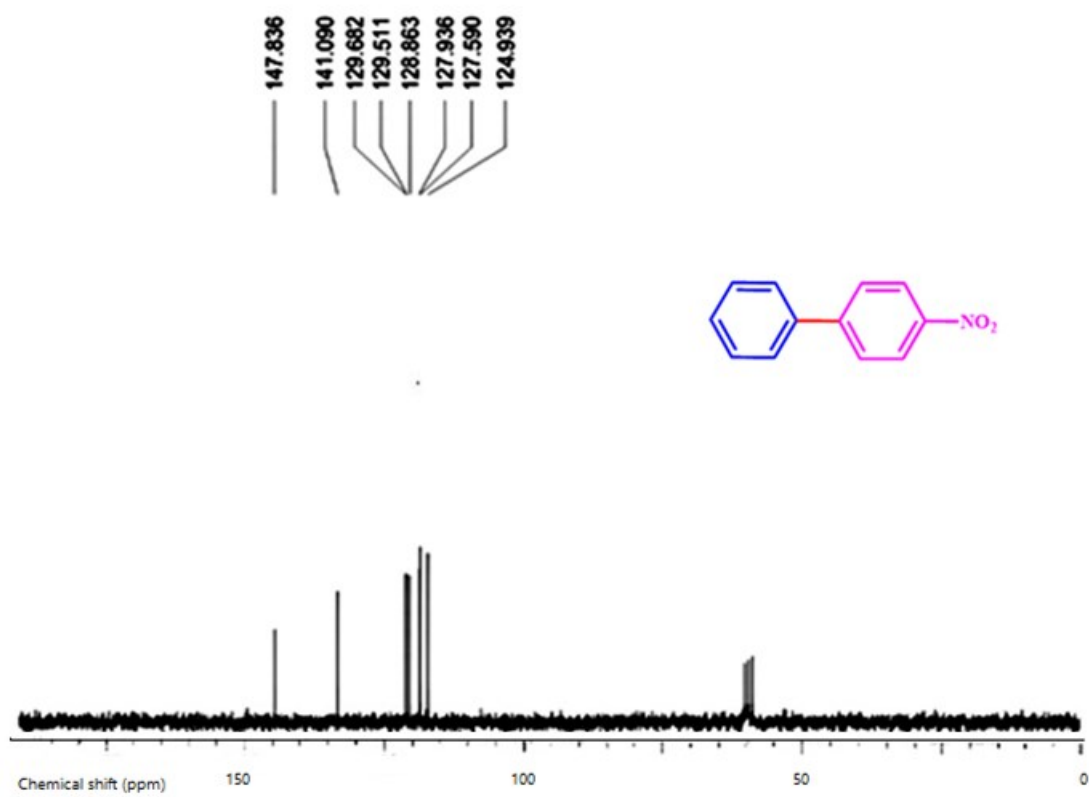

Figure S71. <sup>13</sup>C NMR spectrum of 12i

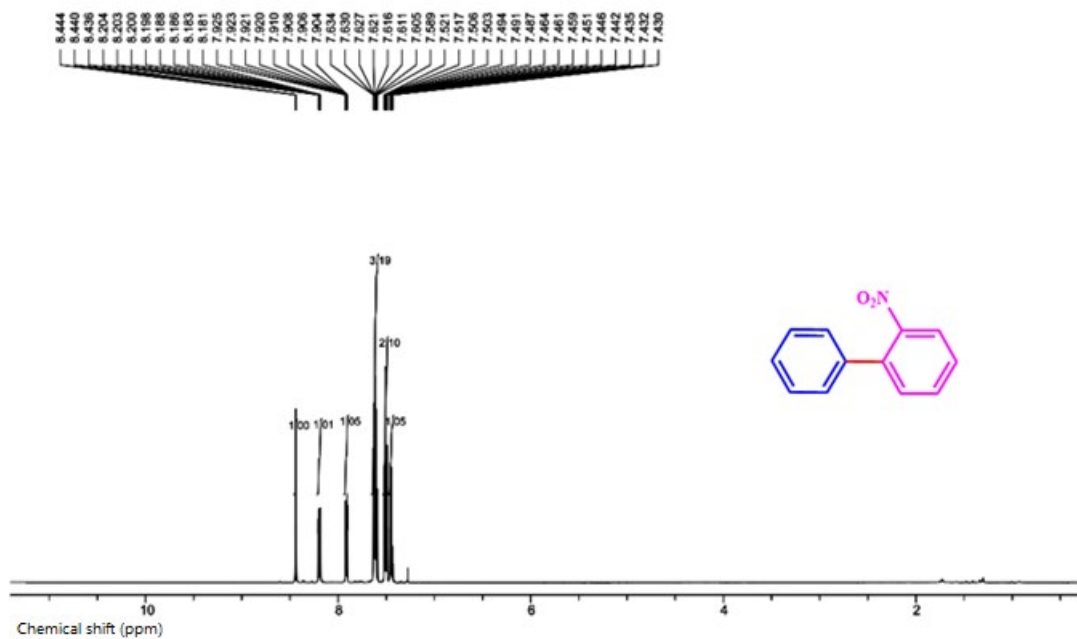

Figure S72. <sup>1</sup>H NMR spectrum of 12j

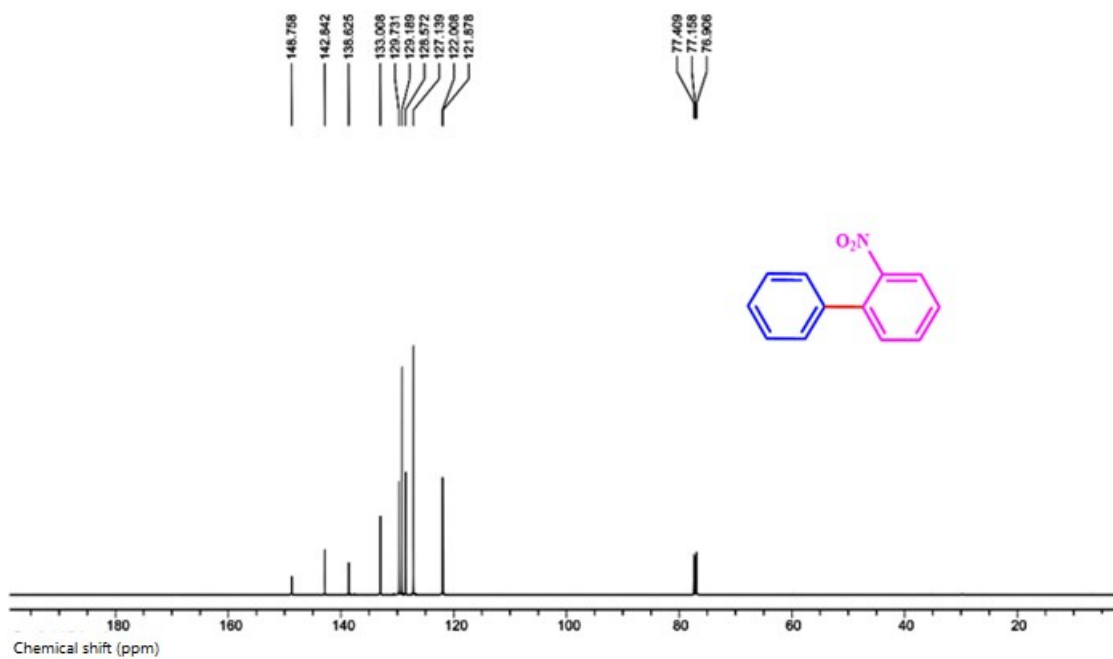

Figure S73. <sup>13</sup>C NMR spectrum of 12j

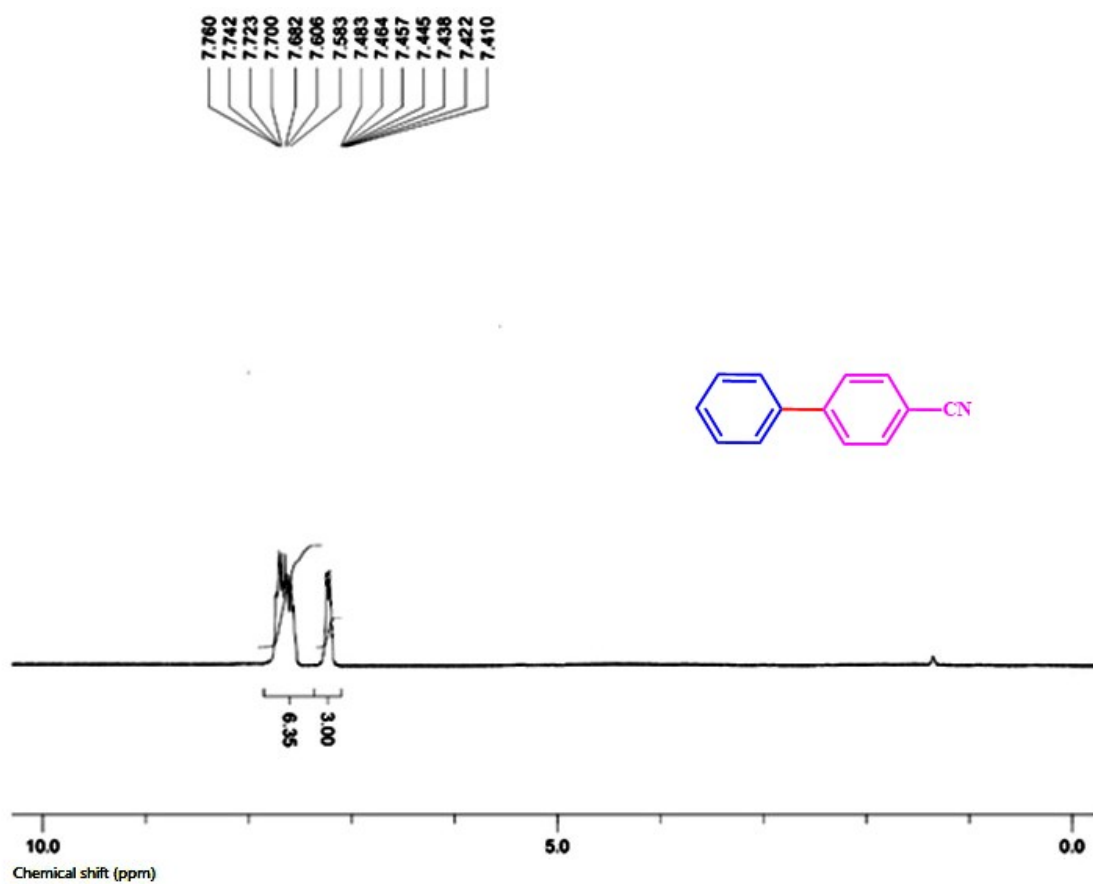

Figure S74. <sup>1</sup>H NMR spectrum of 12k

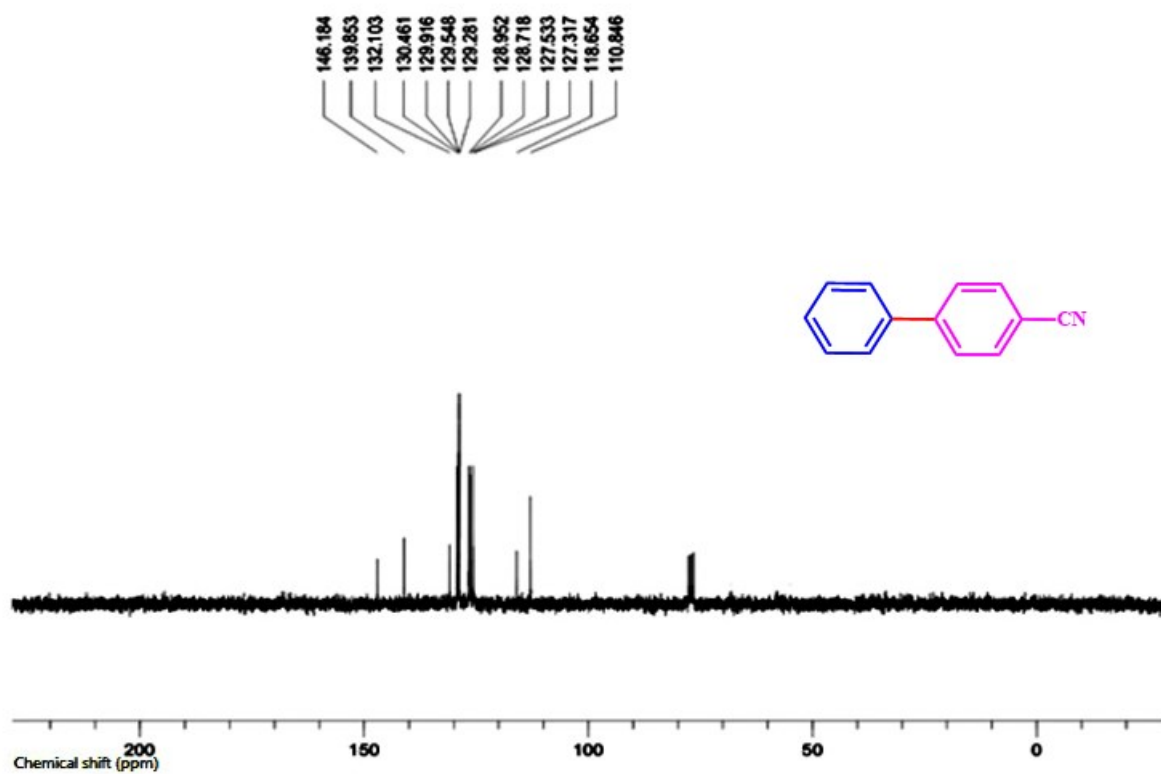

Figure S75. <sup>13</sup>C NMR spectrum of 12k
